# Supplementary material
Source: PubMed Central journal article supplement (PMC2863089)

# **Cooperative *N*-Heterocyclic Carbene/Lewis Acid Catalysis for Highly Stereoselective Annulation Reactions with Homoenolates**

**Benoit Cardinal-David, Dustin E. A. Raup, and Karl A. Scheidt\***

*Department of Chemistry, Center for Molecular Innovation and Drug Discovery,  
Chemistry of Life Processes Institute, Northwestern University, Silverman Hall,  
Evanston, Illinois 60208*

## **Supporting Information**

|                                                                                                                                   |     |
|-----------------------------------------------------------------------------------------------------------------------------------|-----|
| General Information .....                                                                                                         | S2  |
| General Procedure for the Enantioselective Synthesis of <i>cis</i> -cyclopentenes .....                                           | S4  |
| Characterization of Cyclopentenes .....                                                                                           | S5  |
| General Procedure for the Lewis Acid Catalyzed Enantioselective Synthesis of <i>cis</i> - $\gamma$ -butyrolactone <b>24</b> ..... | S24 |
| HPLC Traces of Racemic and Enantioenriched Cyclopentenes .....                                                                    | S25 |
| Selected NMR Spectra .....                                                                                                        | S48 |
| X-Ray Crystallography of <b>20</b> .....                                                                                          | S90 |

## General Information

All reactions were carried out under a nitrogen atmosphere in flame-dried glassware with magnetic stirring.  $\text{CH}_2\text{Cl}_2$  was purified by passage through a bed of activated alumina.<sup>1</sup> Reagents were purified prior to use following the guidelines of Perrin and Armarego unless otherwise stated.<sup>2</sup> Purification of reaction products was carried out by flash chromatography using EM Reagent silica gel 60 (230-400 mesh). Analytical thin layer chromatography was performed on EM Reagent 0.25 mm silica gel 60-F plates. Visualization was accomplished with UV light and ceric ammonium nitrate stain or potassium permanganate stain followed by heating. Infrared spectra were recorded on a Perkin Elmer 1600 series FT-IR spectrometer.  $^1\text{H}$ -NMR spectra were recorded on a Varian Inova 500 (500 MHz) spectrometer and are reported in ppm using solvent as an internal standard ( $\text{CDCl}_3$  at 7.26 ppm). Data are reported as (s = singlet, d = doublet, t = triplet, q = quartet, m = multiplet; coupling constant(s) in Hz; integration). Proton-decoupled  $^{13}\text{C}$ -NMR spectra were recorded on a Varian Inova 500 (125 MHz) spectrometer and are reported in ppm using solvent as an internal standard ( $\text{CDCl}_3$  at 77.0 ppm). Mass spectra data were obtained on a Hewlett-Packard/Agilent 5972-A GC-MSD system with electron impact (EI) ionization source.

4-bromo cinnamaldehyde was prepared according to a procedure analogous to Moloney and coworkers.<sup>3</sup> 4-chloro cinnamaldehyde, 4-fluoro cinnamaldehyde and 3-(naphthalen-1-yl)acrylaldehyde were prepared according to the general procedure of Cacchi and coworkers.<sup>4</sup> 4-Methoxy cinnamaldehyde was purchased from Acros Chemical Company and the remaining aldehydes were purchased from Sigma-Aldrich Chemical Company and distilled over  $\text{CaH}_2$  prior use.

*trans*-Chalcone was purchased from Sigma-Aldrich Chemical Company and was recrystallized once from hot hexanes prior use. (*E*)-3-(4-bromophenyl)-1-(4-chlorophenyl)prop-2-en-1-one, (*E*)-1,3-bis(4-chlorophenyl)prop-2-en-1-one, (*E*)-3-(2-chlorophenyl)-1-(4-chlorophenyl)prop-2-en-1-one, (*E*)-1-(4-chlorophenyl)-3-(4-fluorophenyl)prop-2-en-1-one, (*E*)-1-(4-chlorophenyl)-3-(3-nitrophenyl)prop-2-en-1-one, (*E*)-1-(4-chlorophenyl)-3-*p*-tolylprop-2-en-1-one and (*E*)-1-(furan-2-yl)-3-phenylprop-2-en-1-one were prepared according to the general procedure of Dannhardt and coworkers.<sup>5</sup> (*E*)-1-(4-chlorophenyl)-3-(4-methoxyphenyl)prop-2-en-1-one, (*E*)-1-(4-chlorophenyl)-3-(furan-2-yl)prop-2-en-1-one and (*E*)-1-(4-chlorophenyl)-3-(thiophen-2-yl)prop-2-en-1-one were prepared according to the procedure of Emerson and coworkers.<sup>6</sup> If precipitation of the compound did not occur, the organic solvents were removed under reduced pressure. Water was added and the mixture was extracted twice with EtOAc. The combined organic layers were then dried over  $\text{Na}_2\text{SO}_4$ , filtered and concentrated. The crude mixture was finally purified by flash chromatography. In the case of (*E*)-1-(furan-2-yl)-3-phenylprop-2-en-1-

- 
1. Pangborn, A. B.; Giardello, M. A.; Grubbs, R. H.; Rosen, R. K.; Timmers, F. J. *Organometal.* **1996**, *15*, 1518-1520.
  2. Perrin, D. D. and Armarego, W. L. *Purification of Laboratory Chemicals*; 3rd Ed., Pergamon Press, Oxford. 1988.
  3. Baldwin, J. E.; Turner, S. C. M.; Moloney, M. G. *Tetrahedron* **1994**, *50*, 9411-9424.
  4. Battistuzzi, G.; Cacchi, S.; Fabrizi, G. *Org. Lett.* **2003**, *5*, 777-780.
  5. Dannhardt, G.; Kiefer, W.; Kramer, G.; Maehrlin, S.; Nowe, U.; Fiebich, B. *Eur. J. Med. Chem.* **2000**, 499-510.
  6. Emerson, W. S.; Patrick, T. M., Jr. *J. Org. Chem.* **1949**, *14*, 790-797.

one, flash chromatography was followed by recrystallization from hot hexanes/EtOAc (20:1) to afford the pure compound.

### Procedure for the Synthesis of (*E*)-1-phenyl-3-(pyridin-4-yl)prop-2-en-1-one<sup>7</sup>

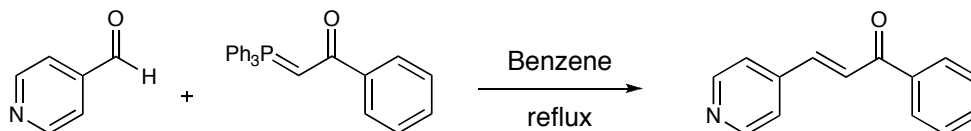

Into a flame-dried round bottom flask equipped with magnetic stirring bar was dissolved 4-pyridinecarboxaldehyde (1.07g, 10.0 mmol) in 50 mL of dry benzene under positive N<sub>2</sub> atmosphere. The Wittig reagent was then added in one portion and the reaction mixture was refluxed for 6 hours. The mixture was concentrated under vacuum and purified twice by flash chromatography using 30% EtOAc/hexanes to 50% EtOAc/hexanes to afford a yellowish solid (1.71 g, 82%).

### Preparation of the Chiral Triazolium Catalyst D

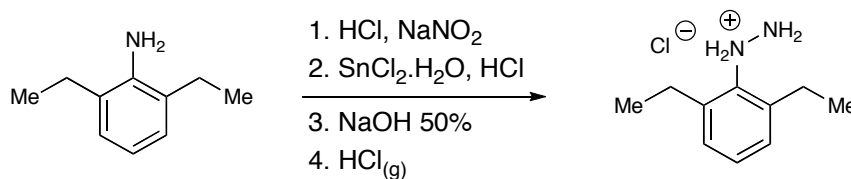

**2,6-diethylphenylhydrazine hydrochloride salt.** To a rapidly stirring solution of 10.93 mL 12M HCl in 4.91 mL water was added 5.0 mL (30 mmol) 2,6-diethylaniline dropwise over 1 hour. Slurry was placed under N<sub>2</sub>, cooled to 0 °C and a solution of NaNO<sub>2</sub> (2.26 g, 1.08 equiv., in 3.40 mL water) was added dropwise over 2.5 hours. (Note: while adding the NaNO<sub>2</sub> it is better to add more slowly in the beginning of the addition. The mixture will be a thick slurry and the nitrite solution must be mixed in slowly and thoroughly to avoid expulsion of NO gas.) Upon completed addition of NaNO<sub>2</sub>, the solution is mostly homogeneous and orange. Continue to stir for 30 minutes at 0 °C then add a solution of 15.24 g (2.24 equiv.) SnCl<sub>2</sub>•H<sub>2</sub>O in 20.52 mL of aqueous 6M HCl slowly dropwise. Over the course of this addition, the mixture will becoming a very thick cream to light orange colored slurry. A small amount of water may be added if the slurry solidifies. At this stage, the mixture is allowed to warm to room temperature and stir for 3-5 days. (Note: This long reduction time is necessary to achieve reproducible results.) After stirring is complete, the slurry is filtered and washed with a small amount of water then a small amount of ether. Most of the orange color from the slurry should wash out with the ether. The solid was then added gradually to a cold (-10 °C) 50% (w/w) solution of NaOH (100 mL) and 70 mL ether under nitrogen. (Note: At this point the compound becomes very air sensitive.) Allow the biphasic mixture to stir rapidly at -10 °C until the solid all dissolves, about 2-3 hours. After 2-3 hours, separate the layers, extract the aqueous layer twice with diethyl ether. Combine the organic fractions and stir briefly over MgSO<sub>4</sub> under nitrogen. Filter the dried solution and treat

7. Robinson, C. N.; Wiseman, L. J., Jr.; Slater, C. D. *Tetrahedron* **1989**, *45*, 4103-4112.

with HCl gas to precipitate out the hydrazine hydrochloride (3.13 g, 52% yield.) Spectral data matched that found in the literature.<sup>8</sup>

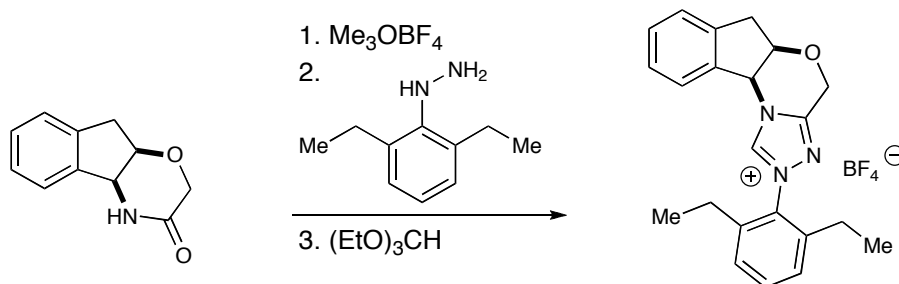

**(5aR,10bS)-2-(2,6-diethylphenyl)-4,5a,6,10b-tetrahydroindeno[2,1-b][1,2,4]triazolo[4,3-d][1,4]oxazin-2-ium tetrafluoroborate (D).** Prepared according to the general procedure by Rovis and coworkers<sup>9</sup> with modifications from the corresponding morpholin-3-one (643 mg, 3.4 mmol). 2,6-Diethylphenylhydrazine hydrochloride (750 mg, 1.1 equiv) was freebased immediately prior to use with 1 M NaOH and was isolated by subsequent extraction with diethyl ether, drying with MgSO<sub>4</sub> and concentration *in vacuo*. The intensely orange oil was added as a solution in a minimal amount of dichloromethane to the preformed imidate. The condensation of the hydrazine and imidate was allowed to proceed at room temperature until judged complete by <sup>1</sup>H NMR spectroscopy. The solution was then concentrated *in vacuo* and placed under high vacuum for 1 hour. The red residue was then dissolved in chlorobenzene (0.15 M) and 5 equivalents of triethylorthoformate. The red solution was then heated to 110 °C. The resultant darkened solution was concentrated and purified by flash column chromatography (50-90% EtOAc/hexanes) followed by precipitation from the resultant orange oil with a minute amount of dichloromethane and hexanes followed by a generous portion of diethyl ether to yield 884 mg (60%) **D** as a white solid. Analytical Data for **D**: IR (film): 3088, 2981, 2942, 2881, 1580, 1185, 1085; <sup>1</sup>H NMR (500 MHz; D<sub>3</sub>COD): δ 11.04 (s, 1H), 7.62 (t, J = 7.7 Hz, 1H), 7.47-7.34 (m, 6H), 6.10 (d, J = 4.1 Hz, 1H), 5.24 (d, J = 16.1 Hz, 1H), 5.11 (d, J = 16.1 Hz, 1H), 5.09 (t, J = 4.5 Hz, 1H), 3.48 (dd, J = 17.1 Hz, 4.9 Hz, 1H), 3.29 (d, J = 18.0 Hz, 2H), 2.54 (bs, 2H), 2.33 (bs, 1H), 1.22 (bs, 3H), 1.14 (bs, 3H); <sup>13</sup>C NMR (125 MHz; D<sub>3</sub>COD): δ 152.1, 142.1, 137.0, 133.8, 133.6, 130.9, 128.7, 127.0, 124.2, 78.7, 63.3, 61.1, 38.3, 25.1, 24.9, 15.6, 15.4. LRMS (electrospray): Exact mass calcd for C<sub>22</sub>H<sub>24</sub>BF<sub>4</sub>N<sub>3</sub>O [M] = 433 Found [M-BF<sub>4</sub>] 346. [α]<sub>D</sub><sup>20</sup>: (c 1.00, MeOH): +10.2.

### General Procedure for the Enantioselective Synthesis of *cis*-cyclopentenes

Into an oven-dried screw-capped vial equipped with a magnetic stirbar were weighed the α,β-unsaturated ketone (3 equiv) and azolium salt **B** (0.1 equiv) in a nitrogen-filled drybox. The vial with reagents was capped and removed from the drybox. Into the vial were then successively added degassed (three freeze-pump-thaw cycles) CH<sub>2</sub>Cl<sub>2</sub> (1 mL for 0.1 mmol of aldehyde, 0.1M), cinnamaldehyde (1 equiv), Ti(O*i*-Pr)<sub>4</sub> (0.2 equiv unless otherwise noted), *i*-PrOH (0.2 equiv) and finally DBU (0.15 equiv). Upon consumption of the aldehyde (all reactions were completed within 24 hours), the reaction mixture was filtered through a short plug of SiO<sub>2</sub> (in a

8. Miller, B.; Matjeka, E. R. *J. Am. Chem. Soc.* **1980**, *102*, 4772-4780.

9. Kerr, M. S.; Read de Alaniz, J.; Rovis, T. *J. Org. Chem.* **2005**, *70* 5725-5728.

pipette) and washed with EtOAc. The solution was then concentrated under reduced pressure and purified by flash chromatography with EtOAc/hexanes to afford the corresponding *cis*-cyclopentene.

The corresponding racemic compounds were prepared by employing the same protocol but with achiral azolium salt **A** (15 mol%).

### Characterization of Cyclopentenes

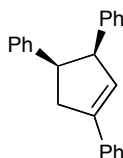

***cis*-1,3(*S*)-4(*R*)-Triphenylcyclopent-1-ene (3)**: Prepared according to general procedure using cinnamaldehyde (21.5  $\mu$ L, 0.17 mmol) and chalcone (106 mg, 0.51 mmol) and purified by flash chromatography using 1% EtOAc/hexanes to afford 37 mg (74% yield) of **1** (>20:1 dr) as a white solid.  $^1\text{H}$  NMR (500 MHz,  $\text{CDCl}_3$ )  $\delta$  7.61 (d,  $J$  = 7.3 Hz, 2H), 7.41 (t,  $J$  = 7.6 Hz, 2H), 7.32 (t,  $J$  = 7.3 Hz, 1H), 7.07-7.00 (m, 6H), 6.89 (dd,  $J$  = 7.7, 1.8 Hz, 2H), 6.84 (dd,  $J$  = 7.5, 1.9 Hz, 2H), 6.37 (s, 1H), 4.36 (d,  $J$  = 8.5 Hz, 1H), 4.06 (ddd,  $J$  = 8.3, 8.3, 8.3 Hz, 1H), 3.19 (dddd,  $J$  = 15.6, 8.3, 1.7, 1.7 Hz, 1H), 3.12 (dddd,  $J$  = 15.5, 8.2, 0.8, 0.8 Hz, 1H);  $^{13}\text{C}$  NMR (125 MHz,  $\text{CDCl}_3$ )  $\delta$  143.7, 141.5, 140.6, 136.0, 128.7, 128.5, 128.4, 128.0, 127.7, 127.54, 127.50, 126.0, 125.8, 56.8, 50.1, 38.1; IR (film) 3079, 3021, 2925, 2906, 2883, 2846, 1600, 1493, 1452  $\text{cm}^{-1}$ ; LRMS (EI): Mass calcd for  $\text{C}_{23}\text{H}_{20}$  [ $\text{M}^+$ ]: 296, found [ $\text{M}^+$ ]: 296;  $[\alpha]_{\text{D}}^{20}$ : ( $c$  1.00,  $\text{CHCl}_3$ ): +257.0; Enantiomeric ratio was measured by reverse phase HPLC (Chiralcel AD-RH, 60% MeCN/ $\text{H}_2\text{O}$ , 1 mL/min),  $R_t$  (*cis*) = 17.0 and 23.3 min,  $R_t$  (*trans*) = 20.4 and 35.9 min; ee *cis* = 99%.

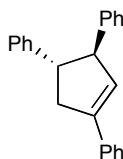

**( $\pm$ )-*trans*-1,3(*S*)-4(*S*)-Triphenylcyclopent-1-ene**: Prepared according to the procedure reported by Nair.<sup>10</sup> This compound was reported previously in the same communication.

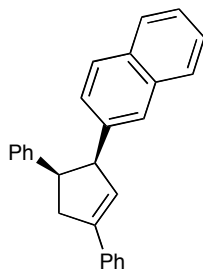

***cis*-1,4(*R*)-Diphenyl-3(*S*)-(2-naphthyl)-cyclopent-1-ene (4)**: Prepared according to general procedure using (*E*)-3-(naphthalen-1-yl)prop-2-enal (26.3 mg, 0.144 mmol) and chalcone (90 mg, 0.433 mmol) and purified by flash chromatography using 1% EtOAc/hexanes to afford 38

10. Nair, V.; Vellalath, S.; Poonoth, M.; Suresh, E. *J. Am. Chem. Soc.* **2006**, *128*, 8736-8737.

mg (76% yield) of **2** (>20:1 dr) as a yellowish oil.  $^1\text{H}$  NMR (500 MHz,  $\text{CDCl}_3$ )  $\delta$  7.69-7.64 (m, 4H), 7.48-7.42 (m, 3H), 7.40 (s, 1H), 7.33-7.39 (m, 3H), 6.98-6.91 (m, 5H), 6.86 (dd,  $J = 8.5, 1.7$  Hz, 1H), 6.45 (dd,  $J = 4.1, 1.7$  Hz, 1H), 4.52 (ddd,  $J = 8.6, 1.8, 1.8$  Hz, 1H), 4.14 (ddd,  $J = 8.4, 8.4, 8.4$  Hz, 1H), 3.26 (dddd,  $J = 15.7, 8.4, 2.0, 2.0$  Hz, 1H), 3.17 (dddd,  $J = 15.7, 8.2, 1.0, 1.0$  Hz, 1H);  $^{13}\text{C}$  NMR (125 MHz,  $\text{CDCl}_3$ )  $\delta$  143.8, 141.4, 138.4, 136.1, 133.1, 132.1, 128.5, 128.4, 128.0, 127.7, 127.6, 127.5, 127.4, 127.0, 126.9, 125.85, 125.83, 125.5, 125.0, 56.8, 50.1, 38.2; IR (film) 3055, 3024, 2899, 2841, 1600, 1494, 1453, 1446, 853, 818  $\text{cm}^{-1}$ ; LRMS (EI): Mass calcd for  $\text{C}_{27}\text{H}_{22}$  [ $\text{M}^+$ ]: 346, found [ $\text{M}^+$ ]: 346;  $[\alpha]_{\text{D}}^{20}$ : ( $c$  1.68,  $\text{CHCl}_3$ ): +235.8; Enantiomeric ratio was measured by reverse phase HPLC (Chiralcel AD-RH, 68%  $\text{MeCN}/\text{H}_2\text{O}$ , 1 mL/min),  $R_t$  (*cis*) = 11.3 and 15.2 min,  $R_t$  (*trans*) = 18.1 and 25.5 min; ee *cis* = 99%.

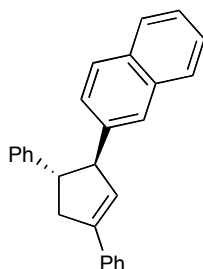

**(±)-*trans*-1,4(*S*)-Diphenyl-3(*S*)-(2-naphtyl)-cyclopent-1-ene**: Prepared according to the procedure reported by Nair<sup>10</sup> using (*E*)-3-(naphthalen-1-yl)prop-2-enal and chalcone and purified by flash chromatography using 1% EtOAc/hexanes. The compound was obtained in 77% yield (16:1 dr) as a yellowish oil.  $^1\text{H}$  NMR (500 MHz,  $\text{CDCl}_3$ )  $\delta$  7.81 (dd,  $J = 6.3, 2.7$  Hz, 1H), 7.78 (d,  $J = 8.5$  Hz, 1H), 7.75 (dd,  $J = 6.7, 2.7$  Hz, 1H), 7.61-7.57 (m, 3H), 7.45-7.42 (m, 2H), 7.42-7.38 (m, 2H), 7.33-7.27 (m, 6H), 7.25-7.21 (m, 1H), 6.35 (dd,  $J = 3.1, 1.8$  Hz, 1H), 4.30 (ddd,  $J = 7.0, 4.2, 2.0$  Hz, 1H), 3.55 (ddd,  $J = 8.2, 7.4, 7.4$  Hz, 1H), 3.42 (dddd,  $J = 15.9, 8.9, 2.0, 1.5$  Hz, 1H), 3.08 (dddd,  $J = 15.9, 7.4, 2.2, 2.2$  Hz, 1H);  $^{13}\text{C}$  NMR (125 MHz,  $\text{CDCl}_3$ )  $\delta$  145.4, 142.4, 142.3, 135.9, 133.5, 132.4, 128.50, 128.49, 128.1, 128.0, 127.6, 127.58, 127.57, 127.3, 126.3, 126.2, 125.9, 125.8, 125.5, 125.3, 61.1, 54.4, 42.0; IR (film) 3055, 3024, 2923, 2848, 1632, 1600, 1506, 1494, 1454, 1446, 854, 815  $\text{cm}^{-1}$ ; LRMS (EI): Mass calcd for  $\text{C}_{27}\text{H}_{22}$  [ $\text{M}^+$ ]: 346, found [ $\text{M}^+$ ]: 346.

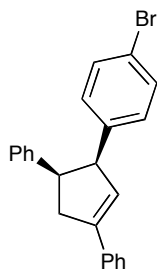

***cis*-3(*S*)-(4-Bromophenyl)-1,4(*R*)-diphenylcyclopent-1-ene (5)**: Prepared according to general procedure using 4-bromocinnamaldehyde (56 mg, 0.266 mmol) and chalcone (166 mg, 0.266 mmol) and purified by flash chromatography using 1% EtOAc/hexanes to afford 67 mg (67% yield) of **3** (>20:1 dr) as a yellow solid.  $^1\text{H}$  NMR (500 MHz,  $\text{CDCl}_3$ )  $\delta$  7.62-7.58 (m, 2H), 7.43-7.39 (m, 2H), 7.33 (tt,  $J = 7.4, 1.5$  Hz, 1H), 7.15 (ddd,  $J = 9.1, 2.5, 1.9$  Hz, 2H), 7.09-7.01 (m, 3H), 6.90-6.87 (m, 2H), 6.70 (ddd,  $J = 9.1, 4.3, 1.8$  Hz, 2H), 6.31 (dd,  $J = 4.2, 1.8$  Hz, 1H), 4.30 (ddd,  $J = 8.6, 2.0, 2.0$  Hz, 1H), 4.04 (ddd,  $J = 8.3, 8.3, 8.3$  Hz, 1H), 3.16 (dddd,  $J = 15.7, 8.3, 2.0,$

2.0 Hz, 1H), 3.10 (dddd,  $J = 15.7, 8.2, 1.2, 1.2$  Hz, 1H);  $^{13}\text{C}$  NMR (125 MHz,  $\text{CDCl}_3$ )  $\delta$  144.2, 141.1, 139.7, 135.8, 130.7, 130.4, 128.5, 128.3, 127.7, 127.4, 126.0, 125.8, 119.9, 56.2, 49.9, 37.8; IR (film) 3081, 3059, 3027, 2871, 1600, 1485, 1453, 1447, 1072, 1010, 860, 829, 754, 719, 699, 693  $\text{cm}^{-1}$ ; LRMS (EI): Mass calcd for  $\text{C}_{23}\text{H}_{19}\text{Br}$  [ $\text{M}^+$ ]: 374, found [ $\text{M}^+$ ]: 374;  $[\alpha]_{\text{D}}^{20}$ : ( $c$  1.33,  $\text{CHCl}_3$ ): +84.4; Enantiomeric ratio was measured by HPLC (Chiralcel AD-H, 0.6% IPA/hexanes, 0.9 mL/min),  $R_t$  (*cis*) = 7.5 and 8.5 min,  $R_t$  (*trans*) = 10.0 and 11.8 min; ee *cis* = 98%.

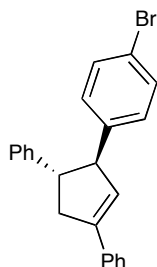

**(±)-*trans*-3(*S*)-(4-Bromophenyl)-1,4(*S*)-diphenylcyclopent-1-ene**: Prepared according to the procedure reported by Nair.<sup>10</sup> This compound was reported previously in the same communication.

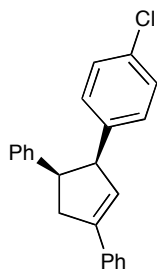

***cis*-3(*S*)-(4-Chlorophenyl)-1,4(*R*)-diphenylcyclopent-1-ene (6)**: Prepared according to general procedure using 4-chlorocinnamaldehyde (50.3 mg, 0.302 mmol) and chalcone (189 mg, 0.90 mmol) and purified by flash chromatography using 1% EtOAc/hexanes to afford 65 mg (65% yield) of **4** (>20:1 dr) as a yellowish solid.  $^1\text{H}$  NMR (500 MHz,  $\text{CDCl}_3$ )  $\delta$  7.63-7.59 (m, 2H), 7.44-7.39 (m, 2H), 7.32 (tt,  $J = 1.5, 7.4$  Hz, 1H), 7.08-7.02 (m, 3H), 7.00 (ddd,  $J = 9.1, 2.7, 2.0$  Hz, 2H), 6.92-6.87 (m, 2H), 6.75 (ddd,  $J = 9.1, 2.6, 1.9$  Hz, 2H), 6.32 (dd,  $J = 4.2, 1.8$  Hz, 1H), 4.32 (ddd,  $J = 8.6, 1.9, 1.9$  Hz, 1H), 4.05 (ddd,  $J = 8.3, 8.3, 8.3$  Hz, 1H), 3.17 (dddd,  $J = 15.7, 8.3, 2.0, 2.0$  Hz, 1H), 3.11 (dddd,  $J = 15.7, 8.2, 1.1, 1.1$  Hz, 1H);  $^{13}\text{C}$  NMR (125 MHz,  $\text{CDCl}_3$ )  $\delta$  144.2, 141.2, 139.2, 135.9, 131.8, 130.0, 128.6, 128.4, 127.81, 127.78, 127.5, 126.1, 125.9, 56.2, 50.0, 37.9; IR (film) 3059, 3028, 2910, 2848, 1601, 1490, 1453, 1447, 1409, 1091, 1014, 832, 755, 726, 698  $\text{cm}^{-1}$ ; LRMS (EI): Mass calcd for  $\text{C}_{23}\text{H}_{19}\text{Cl}$  [ $\text{M}^+$ ]: 330, found [ $\text{M}^+$ ]: 330;  $[\alpha]_{\text{D}}^{20}$ : ( $c$  1.00,  $\text{CHCl}_3$ ): +247.5; Enantiomeric ratio was measured by HPLC (Chiralcel AD-H, 0.3% IPA/hexanes, 1.0 mL/min),  $R_t$  (*cis*) = 6.9 and 7.7 min,  $R_t$  (*trans*) = 9.8 and 11.4 min; ee *cis* = 99%.

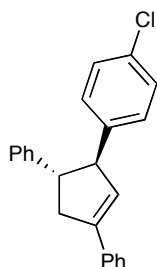

**(±)-*trans*-3(S)-(4-Chlorophenyl)-1,4(S)-diphenylcyclopent-1-ene:** Prepared according to the procedure reported by Nair<sup>10</sup> using 4-chlorocinnamaldehyde and chalcone and purified by flash chromatography using 1% EtOAc/hexanes. The compound was obtained in 71% yield (16:1 dr) as a yellowish solid. <sup>1</sup>H NMR (500 MHz, CDCl<sub>3</sub>) δ 7.56-7.53 (m, 2H), 7.41-7.36 (m, 2H), 7.34-7.28 (m, 3H), 7.26-7.21 (m, 5H), 7.07 (ddd, *J* = 9.2, 2.9, 1.6 Hz, 2H), 6.24-6.21 (m, 1H), 4.11 (ddd, *J* = 6.7, 4.5, 2.1 Hz, 1H), 3.42-3.30 (m, 2H), 3.03 (dddd, *J* = 14.8, 6.5, 3.2, 2.1 Hz, 1H); <sup>13</sup>C NMR (125 MHz, CDCl<sub>3</sub>) δ 144.8, 143.3, 142.6, 135.7, 132.1, 128.7, 128.53, 128.52, 128.48, 127.7, 127.4, 127.3, 126.4, 125.8, 60.2, 54.8, 41.9; IR (film) 3081, 3059, 3027, 2923, 2849, 1601, 1491, 1454, 1447, 1409, 1090, 1014, 828, 755, 697 cm<sup>-1</sup>; LRMS (EI): Mass calcd for C<sub>23</sub>H<sub>19</sub>Cl [M<sup>+</sup>]: 330, found [M]<sup>+</sup>: 330.

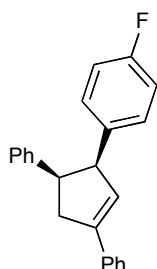

***cis*-1,4(R)-Diphenyl-3(S)-(4-fluorophenyl)-cyclopent-1-ene (7):** Prepared according to general procedure using 4-fluorocinnamaldehyde (47.8 mg, 0.318 mmol) and chalcone (199 mg, 0.954 mmol) and purified by flash chromatography using 1% EtOAc/hexanes to afford 74 mg (74% yield) of **5** (>20:1 dr) as a yellowish solid. <sup>1</sup>H NMR (500 MHz, CDCl<sub>3</sub>) δ 7.62-7.59 (m, 2H), 7.44-7.39 (m, 2H), 7.33 (tt, *J* = 7.4, 1.3 Hz, 1H), 7.09-7.00 (m, 3H), 6.90-6.86 (m, 2H), 6.80-6.76 (m, 2H), 6.73 (tt, *J* = 8.7, 2.3 Hz, 2H), 6.33 (dd, *J* = 4.1, 1.8 Hz, 1H), 4.33 (dd, *J* = 8.5, 1.7 Hz, 1H), 4.03 (ddd, *J* = 8.4, 8.4, 8.4 Hz, 1H), 3.16 (dddd, *J* = 15.7, 8.3, 2.0, 2.0 Hz, 1H), 3.10 (dddd, *J* = 15.7, 8.2, 1.1, 1.1 Hz, 1H); <sup>13</sup>C NMR (125 MHz, CDCl<sub>3</sub>) δ 161.5 (d, *J* = 244 Hz, 1C), 143.9, 141.3, 136.2 (d, *J* = 3.5 Hz, 2C), 135.9, 130.02, 129.95, 128.5, 128.4, 127.72, 127.66, 127.64, 125.9, 125.8, 114.4 (d, *J* = 21.3 Hz, 2C), 114.3, 56.0, 50.0, 37.8; IR (film) 3081, 3057, 3030, 2913, 2849, 1602, 1507, 1494, 1453, 1446, 1220, 1157, 836 cm<sup>-1</sup>; LRMS (EI): Mass calcd for C<sub>23</sub>H<sub>19</sub>F [M<sup>+</sup>]: 314, found [M]<sup>+</sup>: 314; [α]<sub>D</sub><sup>20</sup>: (*c* 0.95, CHCl<sub>3</sub>): +188.9; Enantiomeric ratio was measured by reverse phase HPLC (Chiralcel AD-RH; 0-45 min: isocratic 55% MeCN/H<sub>2</sub>O; 45-65 min: gradient 55% MeCN/H<sub>2</sub>O to 65% MeCN/H<sub>2</sub>O; 65-75 min: isocratic 65% MeCN/H<sub>2</sub>O, 1.0 mL/min), Rt (*cis*) = 33.1 and 41.2 min, Rt (*trans*) = 37.5 and 68.2 min; ee *cis* = 99%.



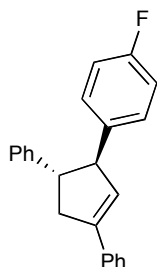

**(±)-*trans*-1,4(*S*)-Diphenyl-3(*S*)-(4-fluorophenyl)-cyclopent-1-ene:** Prepared according to the procedure reported by Nair<sup>10</sup> using 4-fluorocinnamaldehyde and chalcone and purified by flash chromatography using 1% EtOAc/hexanes. The compound was obtained in 73% yield (15:1 dr) as a white solid. <sup>1</sup>H NMR (500 MHz, CDCl<sub>3</sub>) δ 7.56-7.52 (m, 2H), 7.40-7.35 (m, 2H), 7.33-7.27 (m, 3H), 7.25-7.21 (m, 3H), 7.11-7.07 (m, 2H), 6.98-6.93 (m, 2H), 6.23 (dd, *J* = 3.5, 2.1 Hz, 1H), 4.11 (ddd, *J* = 6.9, 4.8, 2.4 Hz, 1H), 3.38 (ddd, *J* = 8.7, 7.1, 7.1 Hz, 1H), 3.33 (dddd, *J* = 15.1, 8.8, 2.2, 1.5 Hz, 1H), 3.02 (dddd, *J* = 14.9, 6.7, 3.1, 2.0 Hz, 1H); <sup>13</sup>C NMR (125 MHz, CDCl<sub>3</sub>) δ 161.6 (d, *J* = 244 Hz, 1C), 145.0, 142.3, 140.5 (d, *J* = 3.3 Hz, 2C), 135.8, 128.8, 128.7, 128.51, 128.48, 127.8, 127.6, 127.3, 126.4, 125.8, 115.2 (d, *J* = 21.0 Hz, 2C), 60.0, 54.9, 41.8; IR (film) 3057, 3027, 2923, 2846, 1601, 508, 1494, 1446, 1221, 1156, 834 cm<sup>-1</sup>; LRMS (EI): Mass calcd for C<sub>23</sub>H<sub>19</sub>F [M<sup>+</sup>]: 314, found [M]<sup>+</sup>: 314.

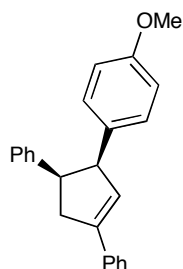

***cis*-1,4(*R*)-Diphenyl-3(*S*)-(4-methoxyphenyl)-cyclopent-1-ene (8):** Prepared according to general procedure using 4-methoxycinnamaldehyde (49.7 mg, 0.306) and chalcone (191 mg, 0.918) and purified by flash chromatography using 1% EtOAc/hexanes to afford 80 mg (80% yield) of **6** (>20:1 dr) as a yellowish solid. <sup>1</sup>H NMR (500 MHz, CDCl<sub>3</sub>) δ 7.63-7.59 (m, 2H), 7.44-7.39 (m, 2H), 7.34-7.30 (m, 1H), 7.09-7.01 (m, 3H), 6.93-6.81 (m, 2H), 6.78-6.73 (m, 2H), 6.63-6.58 (m, 2H), 6.37-6.34 (m, 1H), 4.30 (d, *J* = 8.4 Hz, 1H), 4.01 (ddd, *J* = 8.4, 8.4, 8.4 Hz, 1H), 3.70 (s, 3H), 3.16 (dddd, *J* = 15.6, 8.5, 3.4, 1.7 Hz, 1H), 3.09 (dddd, *J* = 15.6, 8.1, 1.8, 1.2 Hz, 1H); <sup>13</sup>C NMR (125 MHz, CDCl<sub>3</sub>) δ 157.9, 143.3, 141.6, 136.1, 132.6, 129.6, 128.49, 128.46, 128.37, 127.54, 127.48, 125.7, 113.1, 55.9, 55.1, 50.1, 37.9; IR (film) 3059, 3029, 2929, 2906, 2835, 1608, 1510, 1494, 1453, 1446, 1301, 1249, 1175, 1036, 832, 758, 747, 698 cm<sup>-1</sup>; LRMS (EI): Mass calcd for C<sub>24</sub>H<sub>22</sub>O [M<sup>+</sup>]: 326, found [M]<sup>+</sup>: 326; [α]<sub>D</sub><sup>20</sup>: (*c* 1.00, CHCl<sub>3</sub>): +259.4; Enantiomeric ratio was measured by HPLC (Chiralcel AD-H, 0.4% IPA/hexanes, 1.0 mL/min), Rt (*cis*) = 10.1 and 11.5 min, Rt (*trans*) = 15.8 and 15.8 min; ee *cis* = 99%.

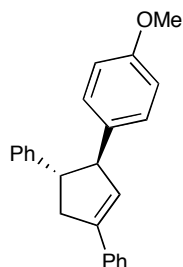

**(±)-*trans*-1,4(*S*)-Diphenyl-3(*S*)-(4-Methoxyphenyl)-cyclopent-1-ene** Prepared according to the procedure reported by Nair.<sup>10</sup> This compound was reported previously in the same communication.

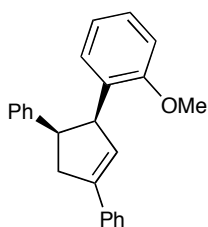

***cis*-3(*S*)-(2-Methoxyphenyl)-1,4(*R*)-diphenylcyclopent-1-ene (9):** Prepared according to general procedure using 2-methoxycinnamaldehyde (49.7 mg, 0.306 mmol) and chalcone (191 mg, 0.918 mmol). Complete consumption of the aldehyde was achieved after 48h of reaction time. The crude mixture was purified by flash chromatography using 0.75% EtOAc/hexanes to afford 54 mg (54% yield) of **7** (>20:1 dr) as a colorless gum. <sup>1</sup>H NMR (500 MHz, CDCl<sub>3</sub>) δ 7.62 (ddd, *J* = 8.2, 0.9, 0.9 Hz, 2H), 7.44-7.39 (m, 2H), 7.32 (tdd, *J* = 7.4, 2.0, 0.9 Hz, 1H), 7.03 (tt, *J* = 7.8, 1.5 Hz, 1H), 7.01-6.95 (m, 4H), 6.90-6.86 (m, 2H), 6.72 (tt, *J* = 7.4, 1.1 Hz, 1H), 6.54 (ddd, *J* = 8.2, 0.7, 0.7 Hz, 1H), 6.34-6.31 (m, 1H), 4.86-4.81 (m, 1H), 4.12-4.06 (m, 1H), 3.49 (d, *J* = 1.0 Hz, 3H), 3.19 (dddd, *J* = 15.8, 8.3, 2.7, 1.4 Hz, 1H), 3.09 (dddd, *J* = 15.8, 7.0, 3.6, 1.8 Hz, 1H); <sup>13</sup>C NMR (125 MHz, CDCl<sub>3</sub>) δ 156.8, 143.5, 142.7, 136.2, 129.5, 128.52, 128.45, 128.3, 127.6, 127.4, 127.2, 126.9, 125.7, 125.5, 119.7, 109.6, 54.8, 49.4, 48.6, 39.6; IR (film) 3059, 3029, 2932, 2833, 1599, 1586, 1491, 1462, 1454, 1446, 1437, 1244, 1108, 1050, 1032, 752, 698, 692 cm<sup>-1</sup>; LRMS (EI): Mass calcd for C<sub>24</sub>H<sub>22</sub>O [M<sup>+</sup>]: 326, found [M]<sup>+</sup>: 326; [α]<sub>D</sub><sup>20</sup>: (*c* 1.04, CHCl<sub>3</sub>): +158.4; Enantiomeric ratio was measured by HPLC (Chiralcel OJ; 0-15 min: isocratic 2% IPA/hexanes; 15-20 min: gradient 2% IPA/hexanes to 5% IPA/hexanes; 20-30 min: isocratic 5% IPA/hexanes, 1.0 mL/min), Rt (*cis*) = 18.5 and 24.5 min, Rt (*trans*) = 13.0 and 15.5 min; ee *cis* = 99%.

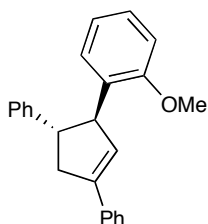

**(±)-*trans*-1,4(*S*)-Diphenyl-3(*S*)-(2-methoxyphenyl)-cyclopent-1-ene:** Prepared according to the procedure reported by Nair<sup>10</sup> using 2-methoxycinnamaldehyde and chalcone and purified by flash chromatography using 0.75% EtOAc/hexanes. The compound was obtained in 89% yield (8:1 dr) as a colorless gum. <sup>1</sup>H NMR (500 MHz, CDCl<sub>3</sub>) δ 7.59-7.55 (m, 2H), 7.41-7.37 (m,

2H), 7.35-7.27 (m, 5H), 7.26 (dt,  $J = 7.5, 1.3$  Hz, 1H), 7.24-7.19 (m, 2H), 6.96-6.91 (m, 1H), 6.87-6.84 (m, 1H), 6.28-6.25 (s, 1H), 4.60-4.55 (m, 1H), 3.63 (d,  $J = 1.5$  Hz, 3H), 3.49-3.44 (m, 1H), 3.34 (m, 1H), 2.97 (m, 1H);  $^{13}\text{C}$  NMR (125 MHz,  $\text{CDCl}_3$ )  $\delta$  157.2, 146.8, 142.3, 136.2, 133.3, 128.5, 128.2, 128.1, 127.6, 127.4, 127.2, 126.0, 125.8, 120.6, 110.6, 55.2, 53.3, 52.7, 41.5; IR (film) 3078, 3056, 3024, 2930, 2833, 1598, 1585, 1492, 1461, 1454, 1446, 1438, 1243, 1108, 1051, 1030, 752, 699, 693  $\text{cm}^{-1}$ ; LRMS (EI): Mass calcd for  $\text{C}_{24}\text{H}_{22}\text{O}$  [ $\text{M}^+$ ]: 326, found [ $\text{M}^+$ ]: 326.

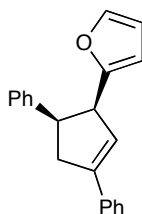

***cis*-1,4(*R*)-Diphenyl-3(*S*)-(furan-2-yl)-cyclopent-1-ene (10)**: Prepared according to general procedure using (*E*)-3-(furan-2-yl)prop-2-enal (42.6 mg, 0.349 mmol) and chalcone (218 mg, 1.047 mmol) and purified by flash chromatography using 0.75% EtOAc/hexanes to afford 73 mg (73% yield) of **8** (>20:1 dr) as a white solid.  $^1\text{H}$  NMR (500 MHz,  $\text{CDCl}_3$ )  $\delta$  7.60-7.56 (m, 2H), 7.43-7.38 (m, 2H), 7.34-7.30 (m, 1H), 7.18-7.11 (m, 3H), 7.10-7.05 (m, 3H), 6.28-6.25 (m, 1H), 6.12-6.10 (m, 1H), 5.87-5.85 (m, 1H), 4.42 (d,  $J = 8.4$  Hz, 1H), 3.97 (ddd,  $J = 8.4, 8.4, 8.4$  Hz, 1H), 3.26 (dddd,  $J = 15.6, 8.5, 3.5, 1.8$  Hz, 1H), 3.14 (dddd,  $J = 15.6, 8.2, 2.1, 1.4$  Hz, 1H);  $^{13}\text{C}$  NMR (125 MHz,  $\text{CDCl}_3$ )  $\delta$  154.5, 144.1, 141.6, 141.2, 135.9, 128.5, 128.0, 127.71, 127.65, 126.1, 125.8, 124.8, 109.8, 106.8, 50.4, 49.0, 38.5; IR (film) 3060, 3026, 2921, 2849, 1603, 1494, 1454, 1447, 1171, 1075, 1032, 1013, 884, 850, 808, 758, 732, 694  $\text{cm}^{-1}$ ; LRMS (EI): Mass calcd for  $\text{C}_{21}\text{H}_{18}\text{O}$  [ $\text{M}^+$ ]: 286, found [ $\text{M}^+$ ]: 286;  $[\alpha]_{\text{D}}^{20}$ : (*c* 0.98,  $\text{CHCl}_3$ ): +232.4; Enantiomeric ratio was measured by reverse phase HPLC (Chiralcel AD-RH; 0-25 min: isocratic 50% MeCN/ $\text{H}_2\text{O}$ ; 25-35 min: gradient 50% MeCN/ $\text{H}_2\text{O}$  to 70% MeCN/ $\text{H}_2\text{O}$ ; 35-45 min: isocratic 70% MeCN/ $\text{H}_2\text{O}$ , 1 mL/min),  $R_t$  (*cis*) = 33.0 and 37.7 min,  $R_t$  (*trans*) = 34.1 and 41.2 min; ee *cis* = 99%.

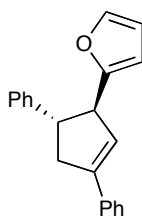

**(±)-*trans*-1,4(*S*)-Diphenyl-3(*S*)-(furan-2-yl)-cyclopent-1-ene**: Prepared according to the procedure reported by Nair<sup>10</sup> using (*E*)-3-(furan-2-yl)prop-2-enal and chalcone and purified by flash chromatography using 0.75% EtOAc/hexanes. The compound was obtained in 85% yield (11:1 dr) as a white solid.  $^1\text{H}$  NMR (500 MHz,  $\text{CDCl}_3$ )  $\delta$  7.54-7.50 (m, 2H), 7.39-7.34 (m, 3H), 7.33-7.27 (m, 5H), 7.26-7.22 (m, 1H), 6.30 (dd,  $J = 2.9, 2.1$  Hz, 1H), 6.24 (dd,  $J = 3.6, 1.7$  Hz, 1H), 6.05-6.03 (m, 1H), 4.23 (ddd,  $J = 6.9, 4.2, 2.3$  Hz, 1H), 3.70 (ddd,  $J = 8.7, 7.3, 7.3$  Hz, 1H), 3.36 (dddd,  $J = 15.9, 8.9, 1.8, 1.8$  Hz, 1H), 2.99 (dddd,  $J = 15.9, 7.3, 2.0, 2.0$  Hz, 1H);  $^{13}\text{C}$  NMR (125 MHz,  $\text{CDCl}_3$ )  $\delta$  157.3, 145.1, 142.4, 141.4, 135.7, 128.5, 128.4, 127.6, 127.2, 126.4, 125.8, 125.2, 110.1, 104.7, 53.5, 50.3, 41.4; IR (film) 3059, 3031, 2921, 2848, 1601, 1503, 1494, 1454,

1447, 1171, 1074, 1011, 755, 732, 699  $\text{cm}^{-1}$ ; LRMS (EI): Mass calcd for  $\text{C}_{21}\text{H}_{18}\text{O}$  [ $\text{M}^+$ ]: 286, found [ $\text{M}^+$ ]: 286.

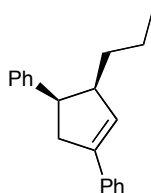

**(±)-cis-1,4(R)-Diphenyl-3(S)-(propyl)-cyclopent-1-ene (11):** Prepared according to general procedure by reacting hexenal (37.4 mg, 0.381 mmol) and chalcone (238 mg, 1.14 mmol) with 15 mol% of the achiral triazolium catalyst (see Table 1 of the manuscript). The compound was purified by flash chromatography using 1% EtOAc/hexanes to afford 62 mg (62% yield) of **9** (>20:1 dr) as a yellowish oil.  $^1\text{H}$  NMR (500 MHz,  $\text{CDCl}_3$ )  $\delta$  7.50-7.45 (m, 2H), 7.35-7.29 (m, 1H), 7.29-7.19 (m, 6H), 7.20-7.14 (m, 1H), 6.28 (s, 1H), 3.70 (ddd,  $J = 7.3, 7.3, 7.3$  Hz, 1H), 3.08-2.96 (m, 3H), 1.34-1.23 (m, 1H), 1.20-4.09 (m, 1H), 0.95 (q,  $J = 7.7$  Hz, 2H), 0.74 (t,  $J = 7.3$  Hz, 3H);  $^{13}\text{C}$  NMR (125 MHz,  $\text{CDCl}_3$ )  $\delta$  142.9, 141.4, 136.5, 129.9, 128.4, 128.0, 127.1, 126.0, 125.5, 49.7, 47.7, 38.0, 33.2, 21.3, 14.3; IR (film) 3082, 3059, 3028, 2957, 2928, 2871, 1601, 1494, 1464, 1453, 1448, 754, 699  $\text{cm}^{-1}$ ; LRMS (EI): Mass calcd for  $\text{C}_{20}\text{H}_{22}$  [ $\text{M}^+$ ]: 262, found [ $\text{M}^+$ ]: 262.

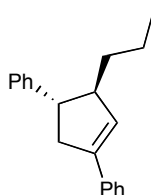

**(±)-trans-1,4(S)-Diphenyl-3(S)-(furan-2-yl)-cyclopent-1-ene:** Prepared according to the procedure reported by Nair<sup>10</sup> using hexenal and chalcone and purified by flash chromatography using 1% EtOAc/hexanes. The compound was obtained in 62% yield (7:1 dr) as a yellowish oil.  $^1\text{H}$  NMR (500 MHz,  $\text{CDCl}_3$ )  $\delta$  7.45-7.41 (m, 2H), 7.33-7.26 (m, 5H), 7.24-7.14 (m, 3H), 6.18 (dd,  $J = 3.6, 2.0$  Hz, 1H), 3.18 (dddd,  $J = 15.6, 9.0, 1.7, 1.7$  Hz, 1H), 3.08 (ddd,  $J = 8.8, 6.7, 6.7$  Hz, 1H), 2.92-2.85 (m, 1H), 2.80 (dddd,  $J = 15.6, 6.9, 2.0, 2.0$  Hz, 1H), 1.52-1.30 (m, 4H), 0.85 (t,  $J = 7.1$  Hz, 3H);  $^{13}\text{C}$  NMR (125 MHz,  $\text{CDCl}_3$ )  $\delta$  146.8, 140.3, 136.3, 129.0, 128.4, 128.3, 127.3, 127.1, 126.0, 125.5, 54.9, 50.8, 42.2, 37.7, 21.0, 14.4; IR (film) 3059, 3026, 2956, 2925, 2870, 1601, 1494, 1447, 754, 700, 692  $\text{cm}^{-1}$ ; LRMS (EI): Mass calcd for  $\text{C}_{20}\text{H}_{22}\text{O}$  [ $\text{M}^+$ ]: 262, found [ $\text{M}^+$ ]: 262.

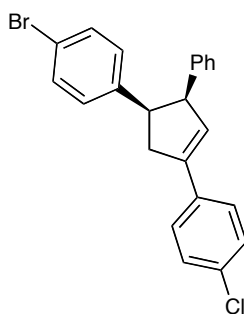

***cis*-4(*R*)-(4-Bromophenyl)-1-(4-chlorophenyl)-3(*S*)-phenyl-cyclopent-1-ene (12):** Prepared according to general procedure using cinnamaldehyde (15.3  $\mu$ L, 0.122 mmol) and (*E*)-3-(4-bromophenyl)-1-(4-chlorophenyl)prop-2-en-1-one (118 mg, 0.366 mmol) and purified by flash chromatography using 1% EtOAc/hexanes to afford 35 mg (70% yield) of **10** (>20:1 dr) as a yellowish gum.  $^1\text{H}$  NMR (500 MHz,  $\text{CDCl}_3$ )  $\delta$  7.51 (ddd,  $J = 9.2, 2.5, 1.8$  Hz, 2H), 7.60 (ddd,  $J = 9.2, 2.5, 1.8$  Hz, 2H), 7.14 (ddd,  $J = 9.2, 2.5, 1.7$  Hz, 2H), 7.10-7.03 (m, 3H), 6.83-6.79 (m, 2H), 6.73 (ddd,  $J = 9.2, 2.4, 1.5$  Hz, 2H), 6.34 (dd,  $J = 4.0, 1.6$  Hz, 1H), 4.33 (ddd,  $J = 8.5, 3.1, 1.6$  Hz, 1H), 3.99 (ddd,  $J = 8.3, 8.3, 8.3$  Hz, 1H), 3.08-3.05 (m, 2H);  $^{13}\text{C}$  NMR (125 MHz,  $\text{CDCl}_3$ )  $\delta$  142.5, 140.4, 139.9, 134.3, 133.3, 130.6, 130.1, 128.7, 128.6, 128.5, 127.9, 127.0, 126.4, 119.7, 56.6, 49.5, 38.2; IR (film) 3059, 3030, 2924, 2846, 1600, 1491, 1452, 1404, 1092, 1074, 1010, 818, 715, 701  $\text{cm}^{-1}$ ; LRMS (EI): Mass calcd for  $\text{C}_{23}\text{H}_{18}\text{BrCl}$  [ $\text{M}^+$ ]: 408, found [ $\text{M}^+$ ]: 408;  $[\alpha]_D^{20}$ : ( $c$  1.16,  $\text{CHCl}_3$ ): +139.2; Enantiomeric ratio was measured by HPLC (Chiralcel AD-H, 1% IPA/hexanes, 1.0 mL/min),  $R_t$  (*cis*) = 6.8 and 7.6 min,  $R_t$  (*trans*) = 9.9 and 14.2 min; ee *cis* = 99%.

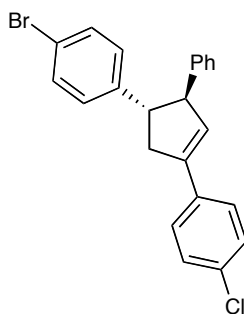

**( $\pm$ )-*trans*-4(*S*)-(4-Bromophenyl)-1-(4-chlorophenyl)-3(*S*)-phenyl-cyclopent-1-ene:** Prepared according to the procedure reported by Nair<sup>10</sup> using cinnamaldehyde and (*E*)-3-(4-bromophenyl)-1-(4-chlorophenyl)prop-2-en-1-one and purified by flash chromatography using 1% EtOAc/hexanes. The compound was obtained in 86% yield (14:1 dr) as a colorless gum.  $^1\text{H}$  NMR (500 MHz,  $\text{CDCl}_3$ )  $\delta$  9.45 (ddd,  $J = 9.1, 2.3, 1.7$  Hz, 2H), 7.41 (ddd,  $J = 9.1, 2.4, 1.6$  Hz, 2H), 7.34 (ddd,  $J = 9.1, 2.3, 1.9$  Hz, 2H), 7.31-7.27 (m, 2H), 7.23 (tt,  $J = 1.6, 7.3$  Hz, 1H), 7.15-7.06 (m, 4H), 6.24 (dd,  $J = 3.7, 1.9$  Hz, 1H), 4.06 (ddd,  $J = 7.3, 4.8, 2.5$  Hz, 1H), 3.41 (ddd,  $J = 8.0, 8.0, 8.0$  Hz, 1H), 3.29 (dddd,  $J = 15.8, 8.8, 1.4, 1.4$  Hz, 1H), 2.94 (dddd,  $J = 15.8, 7.6, 2.3, 2.3$  Hz, 1H);  $^{13}\text{C}$  NMR (125 MHz,  $\text{CDCl}_3$ )  $\delta$  144.2, 143.9, 141.0, 134.2, 133.2, 131.5, 129.1, 128.6, 128.5, 127.3, 127.0, 126.7, 120.0, 60.8, 54.0, 41.8; IR (film) 3059, 3026, 2926, 2848, 1601, 1491, 1452, 1404, 1093, 1073, 1010, 819, 757, 700  $\text{cm}^{-1}$ ; LRMS (EI): Mass calcd for  $\text{C}_{23}\text{H}_{18}\text{BrCl}$  [ $\text{M}^+$ ]: 408.0, found [ $\text{M}^+$ ]: 408.

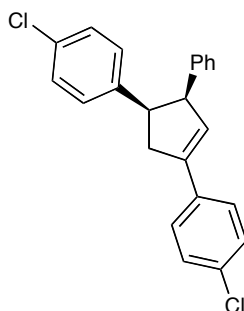

***cis*-1,4(*R*)-bis-(4-Chlorophenyl)-3(*S*)-phenyl-cyclopent-1-ene (13)**: Prepared according to general procedure using cinnamaldehyde (17.2  $\mu$ L, 0.137 mmol) and (*E*)-1,3-bis(4-chlorophenyl)prop-2-en-1-one (114 mg, 0.411 mmol) and purified by flash chromatography using 1% EtOAc/hexanes to afford 33.5 mg (67% yield) of **11** (>20:1 dr) as a colorless gum.  $^1\text{H}$  NMR (500 MHz,  $\text{CDCl}_3$ )  $\delta$  7.51 (ddd,  $J = 9.1, 2.5, 1.9$  Hz, 2H), 7.37 (ddd,  $J = 9.1, 2.5, 1.9$  Hz, 2H), 7.09-7.04 (m, 3H), 6.99 (ddd,  $J = 9.1, 2.6, 1.9$  Hz, 2H), 6.83-6.80 (m, 2H), 6.79 (ddd,  $J = 9.2, 2.4, 1.6$  Hz, 2H), 6.34 (dd,  $J = 4.1, 1.7$  Hz, 1H), 4.33 (ddd,  $J = 8.5, 3.5, 1.7$  Hz, 1H), 4.00 (ddd,  $J = 8.3, 8.3, 8.3$  Hz, 1H), 3.08 (dd,  $J = 1.5, 1.5$  Hz, 1H), 3.06 (dd,  $J = 1.5, 1.5$  Hz, 1H);  $^{13}\text{C}$  NMR (125 MHz,  $\text{CDCl}_3$ )  $\delta$  142.5, 139.94, 139.89, 134.3, 133.3, 131.5, 129.7, 128.7, 128.6, 128.5, 127.9, 127.6, 127.0, 126.4, 56.7, 49.4, 38.3; IR (film) 3059, 3028, 2926, 2848, 1600, 1492, 1452, 1404, 1092, 1013, 819, 732, 718, 700  $\text{cm}^{-1}$ ; LRMS (EI): Mass calcd for  $\text{C}_{23}\text{H}_{18}\text{Cl}_2$  [ $\text{M}^+$ ]: 364, found [ $\text{M}^+$ ]: 364;  $[\alpha]_{\text{D}}^{20}$ : ( $c$  0.83,  $\text{CHCl}_3$ ): +208.8; Enantiomeric ratio was measured by HPLC (Chiralcel OD-H, 0.2% IPA/hexanes, 1.0 mL/min),  $R_t$  (*cis*) = 18.1 and 20.8 min,  $R_t$  (*trans*) = 12.3 and 16.4 min; ee *cis* = 99%.

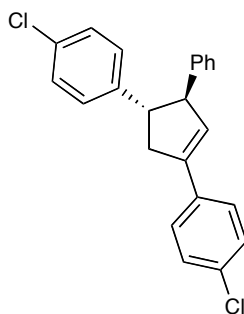

**( $\pm$ )-*trans*-1,4(*S*)-bis-(4-Chlorophenyl)-3(*S*)-phenyl-cyclopent-1-ene**: Prepared according to the procedure reported by Nair<sup>10</sup> using cinnamaldehyde and (*E*)-1,3-bis(4-chlorophenyl)prop-2-en-1-one and purified by flash chromatography using 1% EtOAc/hexanes. The compound was obtained in 80% yield (14:1 dr) as a colorless gum.  $^1\text{H}$  NMR (500 MHz,  $\text{CDCl}_3$ )  $\delta$  7.45 (ddd,  $J = 9.1, 2.5, 1.9$  Hz, 2H), 7.33 (ddd,  $J = 9.1, 2.5, 1.9$  Hz, 2H), 7.31-7.21 (m, 5H), 7.16 (ddd,  $J = 9.1, 2.5, 1.9$  Hz, 2H), 7.13-7.10 (m, 2H), 6.24 (dd,  $J = 3.6, 2.0$  Hz, 1H), 4.06 (ddd,  $J = 7.3, 4.5, 2.2$  Hz, 1H), 3.42 (ddd,  $J = 8.4, 7.7, 7.7$  Hz, 1H), 3.29 (dddd,  $J = 15.8, 8.8, 1.8, 1.8$  Hz, 1H), 2.94 (dddd,  $J = 15.8, 7.7, 2.3, 2.3$  Hz, 1H);  $^{13}\text{C}$  NMR (125 MHz,  $\text{CDCl}_3$ )  $\delta$  144.2, 143.4, 141.0, 134.2, 133.2, 132.0, 128.7, 128.63, 128.61, 128.60, 128.5, 127.3, 127.0, 126.6, 60.8, 54.0, 41.8; IR (film) 3058, 3027, 2925, 2848, 1600, 1484, 1452, 1403, 1093, 1013, 819, 757, 720, 700  $\text{cm}^{-1}$ ; LRMS (EI): Mass calcd for  $\text{C}_{23}\text{H}_{18}\text{Cl}_2$  [ $\text{M}^+$ ]: 364, found [ $\text{M}^+$ ]: 364.

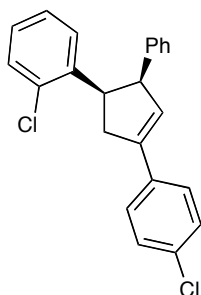

***cis*-4(*R*)-(2-Chlorophenyl)-1-(4-chlorophenyl)-3(*S*)-phenyl-cyclopent-1-ene (14)**: Prepared according to general procedure using cinnamaldehyde (17.2  $\mu$ L, 0.137 mmol) and (*E*)-3-(2-

chlorophenyl)-1-(4-chlorophenyl)prop-2-en-1-one (114 mg, 0.410 mmol) and purified by flash chromatography using 1% EtOAc/hexanes to afford 41 mg (82% yield) of **12** (>20:1 dr) as a white solid.  $^1\text{H}$  NMR (500 MHz,  $\text{CDCl}_3$ )  $\delta$  7.53 (ddd,  $J = 9.1, 2.5, 1.9$  Hz, 2H), 7.37 (ddd,  $J = 9.2, 2.6, 1.9$  Hz, 2H), 7.22 (dd,  $J = 7.9, 1.2$  Hz, 1H), 7.04-6.98 (m, 3H), 6.95 (td,  $J = 7.5, 1.9$  Hz, 1H), 6.88-6.81 (m, 4H), 6.35 (dd,  $J = 3.6, 2.4$  Hz, 1H), 4.57-4.51 (m, 2H), 3.22-3.15 (m, 1H), 3.03-2.95 (m, 1H);  $^{13}\text{C}$  NMR (125 MHz,  $\text{CDCl}_3$ )  $\delta$  142.3, 140.0, 138.6, 134.4, 134.3, 133.2, 128.9, 128.6, 128.5, 128.4, 128.3, 127.7, 127.1, 127.0, 126.3, 126.0, 54.2, 46.0, 36.6; IR (film) 3060, 3026, 2929, 2853, 1600, 1492, 1475, 1453, 1444, 1093, 1035, 1012, 821, 732, 701  $\text{cm}^{-1}$ ; LRMS (ED): Mass calcd for  $\text{C}_{23}\text{H}_{18}\text{Cl}_2$  [ $\text{M}^+$ ]: 364, found [ $\text{M}^+$ ]: 364;  $[\alpha]_D^{20}$ : (c 1.00,  $\text{CHCl}_3$ ): +344.3; Enantiomeric ratio was measured by HPLC (Chiralcel AD-H, 1% IPA/hexanes, 1.0 mL/min), Rt (*cis*) = 6.2 and 6.6 min, Rt (*trans*) = 9.2 and 11.1 min; ee *cis* = 99%.

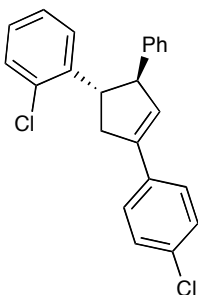

**(±)-*trans*-4(*S*)-(2-Chlorophenyl)-1-(4-chlorophenyl)-3(*S*)-phenyl-cyclopent-1-ene:** Prepared according to the procedure reported by Nair<sup>10</sup> using cinnamaldehyde and (*E*)-3-(2-chlorophenyl)-1-(4-chlorophenyl)prop-2-en-1-one and purified by flash chromatography using 1% EtOAc/hexanes. The compound was obtained in 72% yield (8:1 dr) as a colorless gum.  $^1\text{H}$  NMR (500 MHz,  $\text{CDCl}_3$ )  $\delta$  7.48-7.44 (m, 2H), 7.43-7.39 (m, 1H), 7.37-7.31 (m, 3H), 7.31-6.26 (m, 2H), 7.25-7.21 (m, 2H), 7.21-7.18 (m, 2H), 7.17-7.13 (m, 1H), 6.29-6.27 (m, 1H), 4.26-4.21 (m, 1H), 3.99 (dd,  $J = 8.4, 6.7, 6.7$  Hz, 1H), 3.42-3.34 (m, 1H), 2.92-2.85 (m, 1H);  $^{13}\text{C}$  NMR (125 MHz,  $\text{CDCl}_3$ )  $\delta$  144.1, 142.5, 141.0, 134.2, 133.9, 133.2, 129.7, 128.7, 128.6, 128.5, 128.1, 127.5, 127.4, 127.1, 126.6, 59.2, 49.8, 40.8; IR (film) 3063, 3028, 2928, 2855, 1601, 1492, 1475, 1453, 1436, 1403, 1093, 1035, 1012, 821, 755, 700  $\text{cm}^{-1}$ ; LRMS (ED): Mass calcd for  $\text{C}_{23}\text{H}_{18}\text{Cl}_2$  [ $\text{M}^+$ ]: 364, found [ $\text{M}^+$ ]: 364.

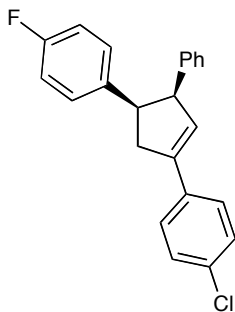

***cis*-1-(4-Chlorophenyl)-4(*R*)-(4-fluorophenyl)-3(*S*)-phenyl-cyclopent-1-ene (15):** Prepared according to general procedure using cinnamaldehyde (18  $\mu\text{L}$ , 0.143 mmol) and (*E*)-1-(4-chlorophenyl)-3-(4-fluorophenyl)prop-2-en-1-one (112 mg, 0.429 mmol) and purified by flash chromatography using 1% EtOAc/hexanes to afford 35 mg (70% yield) of **13** (>20:1 dr) as a colorless gum.  $^1\text{H}$  NMR (500 MHz,  $\text{CDCl}_3$ )  $\delta$  7.51 (ddd,  $J = 9.1, 2.5, 1.9$  Hz, 2H), 7.37 (ddd,  $J =$

9.1, 2.5, 1.9 Hz, 2H), 7.09-7.03 (m, 3H), 6.83-6.78 (m, 4H), 6.71 (tt,  $J = 8.7, 2.4$  Hz, 2H), 6.34 (dd,  $J = 4.2, 1.7$  Hz, 2H), 4.32 (ddd,  $J = 8.6, 3.6, 1.9$  Hz, 1H), 4.02 (ddd,  $J = 8.3, 8.3, 8.3$  Hz, 1H), 3.10-3.06 (m, 1H);  $^{13}\text{C}$  NMR (125 MHz,  $\text{CDCl}_3$ )  $\delta$  161.2 (d,  $J = 244$  Hz, 1C), 142.5, 140.1, 137.0 (d,  $J = 3.0$  Hz, 2C), 134.4, 133.3, 129.7, 129.6, 128.65, 128.64, 128.53, 127.8, 127.0, 126.3, 114.3 (d,  $J = 20.9$  Hz, 2C), 56.8, 49.3, 38.4; IR (film) 3058, 3028, 2927, 2910, 2848, 1602, 1510, 1492, 1452, 1223, 1160, 1093, 1012, 821, 700  $\text{cm}^{-1}$ ; LRMS (EI): Mass calcd for  $\text{C}_{23}\text{H}_{18}\text{FCl}$  [ $\text{M}^+$ ]: 348, found [ $\text{M}^+$ ]: 348;  $[\alpha]_{\text{D}}^{20}$ : ( $c$  1.03,  $\text{CHCl}_3$ ): +143.5; Enantiomeric ratio was measured by reverse phase HPLC (Chiralcel AD-RH, 62.5% MeCN/ $\text{H}_2\text{O}$ , 1.0 mL/min), Rt (*cis*) = 44.3 and 48.1 min, Rt (*trans*) = 39.8 and 53.1 min; ee *cis* = 99%.

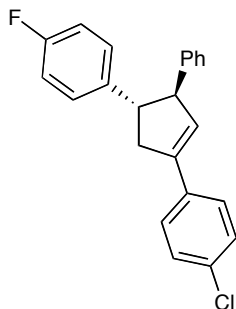

**(±)-*trans*-1-(4-Chlorophenyl)-4(*S*)-(2-chlorophenyl)-3(*S*)-phenyl-cyclopent-1-ene:** Prepared according to the procedure reported by Nair<sup>10</sup> using cinnamaldehyde and (*E*)-1-(4-chlorophenyl)-3-(4-fluorophenyl)prop-2-en-1-one and purified by flash chromatography using 1% EtOAc/hexanes. The compound was obtained in 84% yield (13:1 dr) as a colorless gum.  $^1\text{H}$  NMR (500 MHz,  $\text{CDCl}_3$ )  $\delta$  7.45 (ddd,  $J = 9.1, 2.5, 1.9$  Hz, 2H), 7.34 (ddd,  $J = 4.4, 2.5, 1.9$  Hz, 2H), 7.29 (tt,  $J = 7.3, 1.5$  Hz, 2H), 7.23 (tt,  $J = 7.3, 1.8$  Hz, 1H), 7.18 (dddd,  $J = 5.2, 3.1, 3.1, 3.1$  Hz, 2H), 7.13-7.10 (m, 2H), 6.98 (tt,  $J = 8.7, 2.4$  Hz, 2H), 6.24 (dd,  $J = 3.6, 2.0$  Hz, 1H), 4.06 (ddd,  $J = 7.3, 4.7, 2.3$  Hz, 1H), 3.43 (ddd,  $J = 7.7, 7.7, 7.7$  Hz, 1H), 3.29 (dddd,  $J = 15.8, 8.8, 1.8, 1.8$  Hz, 1H), 2.94 (dddd,  $J = 15.8, 7.7, 2.3, 2.3$  Hz, 1H);  $^{13}\text{C}$  NMR (125 MHz,  $\text{CDCl}_3$ )  $\delta$  161.5 ( $J = 244$  Hz, 1C), 144.3, 141.0, 140.6 (d,  $J = 3.0$  Hz, 2C), 134.3, 133.2, 128.70, 128.69, 128.63, 128.60, 128.5, 127.3, 127.0, 126.6, 115.2 (d,  $J = 20.9$  Hz, 2C), 60.9, 41.9; IR (film) 3058, 3028, 2925, 2849, 1602, 1510, 1492, 1452, 1403, 1224, 1158, 1094, 1012, 821, 700  $\text{cm}^{-1}$ ; LRMS (EI): Mass calcd for  $\text{C}_{23}\text{H}_{18}\text{FCl}$  [ $\text{M}^+$ ]: 348, found [ $\text{M}^+$ ]: 348.

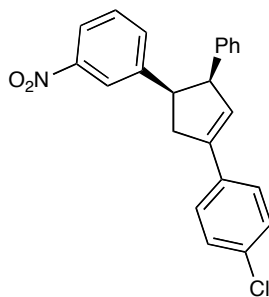

***cis*-1-(4-Chlorophenyl)-4(*R*)-(3-nitrophenyl)-3(*S*)-phenyl-cyclopent-1-ene (16):** Prepared according to general procedure using cinnamaldehyde (16.7  $\mu\text{L}$ , 0.133 mmol) and (*E*)-1-(4-chlorophenyl)-3-(3-nitrophenyl)prop-2-en-1-one (115 mg, 0.399 mmol) and purified by flash chromatography using 1.5% EtOAc/hexanes to 3% EtOAc/hexanes to afford 32.5 mg (65% yield) of **14** (>20:1 dr) as a yellowish gum.  $^1\text{H}$  NMR (500 MHz,  $\text{CDCl}_3$ )  $\delta$  7.87 (ddd,  $J = 7.0,$



2.3, 2.1 Hz, 1H), 7.74-7.71 (m, 1H), 7.52 (ddd,  $J = 9.1, 2.3, 1.7$  Hz, 2H), 7.38 (ddd,  $J = 9.1, 2.3, 1.8$  Hz, 2H), 7.22 -7.16 (m, 2H), 7.08-7.00 (m, 3H), 6.83-6.80 (m, 2H), 6.36 (dd,  $J = 3.9, 1.6$  Hz, 1H), 4.42 (ddd,  $J = 8.6, 3.0, 1.8$  Hz, 1H), 4.15 (ddd,  $J = 8.3, 8.3, 8.3$  Hz, 1H), 3.18-3.15 (m, 2H);  $^{13}\text{C}$  NMR (125 MHz,  $\text{CDCl}_3$ )  $\delta$  147.6, 143.7, 142.4, 139.4, 134.5, 134.0, 133.5, 128.7, 128.5, 128.4, 128.1, 128.1, 127.0, 126.7, 123.3, 121.1, 56.7, 49.4, 38.2; IR (film) 3063, 3030, 2924, 2851, 1600, 1527, 1492, 1452, 1346, 1093, 1012, 823, 703, 690  $\text{cm}^{-1}$ ; LRMS (EI): Mass calcd for  $\text{C}_{23}\text{H}_{18}\text{ClNO}_2$  [ $\text{M}^+$ ]: 375, found [ $\text{M}^+$ ]: 375;  $[\alpha]_{\text{D}}^{20}$ : ( $c$  0.81,  $\text{CHCl}_3$ ): +149.0; Enantiomeric ratio was measured by HPLC (Chiralcel OD-H, 1.2% IPA/Hexanes, 1.0 mL/min),  $R_t$  (*cis*) = 26.6 and 30.2 min,  $R_t$  (*trans*) = 17.9 and 22.3 min; ee *cis* = 99%.

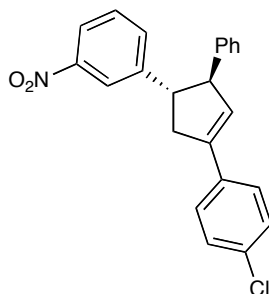

**(±)-*trans*-1-(4-Chlorophenyl)-4(*S*)-(3-nitrophenyl)-3(*S*)-phenyl-cyclopent-1-ene:** Prepared according to the procedure reported by Nair<sup>10</sup> using cinnamaldehyde and (*E*)-1-(4-chlorophenyl)-3-(3-nitrophenyl)prop-2-en-1-one and purified by flash chromatography using 1% EtOAc/hexanes. The compound was obtained in 88% yield (13:1 dr) as a yellowish gum.  $^1\text{H}$  NMR (500 MHz,  $\text{CDCl}_3$ )  $\delta$  8.15 (t,  $J = 1.9$  Hz, 1H), 8.11-8.08 (m, 1H), 7.54-7.51 (m, 1H), 7.48-7.44 (m, 3H), 7.35 (ddd,  $J = 9.1, 1.7, 2.4$  Hz, 2H), 7.30 (tt,  $J = 7.3, 1.4$  Hz, 2H), 7.25 (tt,  $J = 7.3, 1.8$  Hz, 1H), 7.14 -7.11 (m, 2H), 6.26 (dd,  $J = 3.5, 1.9$  Hz, 1H), 4.13 (ddd,  $J = 7.3, 4.4, 2.2$  Hz, 1H), 3.58 (dd,  $J = 7.8, 7.8, 7.8$  Hz, 1H), 3.37 (dddd,  $J = 15.9, 8.8, 1.6, 1.6$  Hz, 1H), 3.00 (dddd,  $J = 15.9, 7.7, 2.3, 2.3$  Hz, 1H);  $^{13}\text{C}$  NMR (125 MHz,  $\text{CDCl}_3$ )  $\delta$  148.4, 147.0, 143.6, 140.8, 133.9, 133.8, 133.5, 129.5, 128.71, 128.68, 128.5, 127.3, 127.0, 126.9, 122.1, 121.6, 60.8, 54.1, 41.7; IR (film) 3063, 3030, 2928, 2855, 1600, 1529, 1492, 1452, 1348, 1093, 1012, 821, 736, 700, 687  $\text{cm}^{-1}$ ; LRMS (EI): Mass calcd for  $\text{C}_{23}\text{H}_{18}\text{ClNO}_2$  [ $\text{M}^+$ ]: 375, found [ $\text{M}^+$ ]: 375.

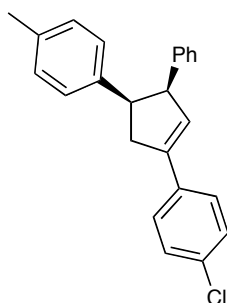

***cis*-1-(4-Chlorophenyl)-4(*R*)-(p-tolyl)-3(*S*)-phenyl-cyclopent-1-ene (17):** Prepared according to general procedure using cinnamaldehyde (18.3  $\mu\text{L}$ , 0.145 mmol) and (*E*)-1-(4-chlorophenyl)-3-*p*-tolylprop-2-en-1-one (112 mg, 0.435 mmol) and purified by flash chromatography using 0.75% EtOAc/hexanes to afford 30 mg (60% yield) of **15** (>20:1 dr) as a colorless gum.  $^1\text{H}$  NMR (500 MHz,  $\text{CDCl}_3$ )  $\delta$  7.51 (ddd,  $J = 9.1, 2.3, 1.6$  Hz, 2H), 7.36 (ddd,  $J = 9.1, 2.2, 1.6$  Hz, 2H), 7.08-7.02 (m, 3H), 6.86-6.81 (m, 4H), 6.77-6.74 (m, 2H), 6.35 (dd,  $J = 3.6, 1.9$  Hz, 1H), 4.31 (ddd,  $J = 8.5, 1.9, 1.9$  Hz, 1H), 4.00 (ddd,  $J = 8.4, 8.4, 8.4$  Hz, 1H), 3.11 (dddd,  $J = 15.6,$

8.6, 1.9, 1.9 Hz, 1H), 3.04 (dd,  $J = 15.6, 8.2$  Hz, 1H), 2.19 (s, 3H);  $^{13}\text{C}$  NMR (125 MHz,  $\text{CDCl}_3$ )  $\delta$  142.6, 140.4, 138.1, 135.3, 134.6, 133.1, 128.81, 128.75, 128.6, 128.2, 127.7, 127.0, 126.1, 56.7, 49.8, 38.2, 20.9; IR (film) 3055, 3026, 2921, 2850, 1601, 1515, 1492, 1452, 1093, 1012, 815, 700  $\text{cm}^{-1}$ ; LRMS (EI): Mass calcd for  $\text{C}_{24}\text{H}_{21}\text{Cl}$  [ $\text{M}^+$ ]: 344, found [ $\text{M}^+$ ]: 344;  $[\alpha]_{\text{D}}^{20}$ : ( $c$  0.93,  $\text{CHCl}_3$ ): +161.5; Enantiomeric ratio was measured by reverse phase HPLC (Chiralcel AD-RH, 65% MeCN/ $\text{H}_2\text{O}$ , 1.0 mL/min), Rt (*cis*) = 21.5 and 25.7 min, Rt (*trans*) = 31.6 and 50.4 min; ee *cis* = 99%.

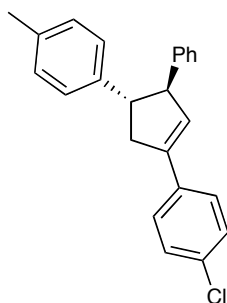

**(±)-*trans*-1-(4-Chlorophenyl)-4(S)-(p-tolyl)-3(S)-phenyl-cyclopent-1-ene**: Prepared according to the procedure reported by Nair<sup>10</sup> using cinnamaldehyde and (*E*)-1-(4-chlorophenyl)-3-*p*-tolylprop-2-en-1-one and purified by flash chromatography using 1% EtOAc/hexanes. The compound was obtained in 80% yield (17:1 dr) as a colorless gum.  $^1\text{H}$  NMR (500 MHz,  $\text{CDCl}_3$ )  $\delta$  7.45 (ddd,  $J = 9.2, 2.4, 1.8$  Hz, 2H), 7.33 (ddd,  $J = 9.2, 2.4, 1.7$  Hz, 2H), 7.30-7.26 (m, 2H), 7.21 (tt  $J = 7.3, 1.6$  Hz, 1H), 7.15-7.09 (m, 6H), 6.24 (dd,  $J = 3.6, 1.9$  Hz, 1H), 4.11 (ddd,  $J = 7.2, 4.6, 2.2$  Hz, 1H), 3.42 (ddd,  $J = 8.4, 7.6, 7.6$  Hz, 1H), 3.28 (dddd,  $J = 15.8, 8.9, 1.7, 1.7$  Hz, 1H), 2.96 (dddd,  $J = 15.8, 7.6, 2.3, 2.3$  Hz, 1H), 2.33 (s, 3H);  $^{13}\text{C}$  NMR (125 MHz,  $\text{CDCl}_3$ )  $\delta$  144.7, 142.0, 141.0, 135.8, 134.4, 133.1, 129.2, 128.8, 128.6, 128.4, 127.4, 127.2, 127.0, 126.4, 60.7, 54.1, 42.0, 21.0; IR (film) 3055, 3025, 2920, 2849, 1600, 1514, 1492, 1452, 1402, 1091, 1012, 815, 700  $\text{cm}^{-1}$ ; LRMS (EI): Mass calcd for  $\text{C}_{24}\text{H}_{21}\text{Cl}$  [ $\text{M}^+$ ]: 344, found [ $\text{M}^+$ ]: 344.

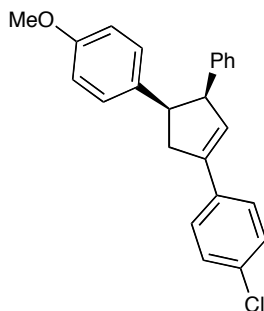

***cis*-1-(4-Chlorophenyl)-4(R)-(4-methoxyphenyl)-3(S)-phenyl-cyclopent-1-ene (18)**: Prepared according to general procedure using cinnamaldehyde (17.4  $\mu\text{L}$ , 0.138 mmol) and (*E*)-1-(4-chlorophenyl)-3-(4-methoxyphenyl)prop-2-en-1-one (113 mg, 0.415 mmol) and purified by flash chromatography using 1% EtOAc/hexanes to afford 31 mg (62% yield) of **16** (>20:1 dr) as a yellowish gum.  $^1\text{H}$  NMR (500 MHz,  $\text{CDCl}_3$ )  $\delta$  7.51 (ddd,  $J = 9.1, 2.4, 1.9$  Hz, 2H), 7.36 (ddd,  $J = 9.2, 2.5, 1.8$  Hz, 2H), 7.09-7.02 (m, 3H), 6.84-6.80 (m, 2H), 6.77 (ddd,  $J = 9.1, 2.5, 2.0$  Hz, 2H), 6.57 (ddd  $J = 9.7, 3.0, 1.9$  Hz, 2H), 6.35 (dd,  $J = 3.8, 1.6$  Hz, 1H), 4.29 (d,  $J = 8.6$  Hz, 1H), 3.99 (ddd,  $J = 8.4, 8.4, 8.4$  Hz, 1H), 3.69 (s, 3H), 3.10-3.00 (m, 2H);  $^{13}\text{C}$  NMR (125 MHz,  $\text{CDCl}_3$ )  $\delta$  157.6, 142.6, 140.4, 134.5, 133.4, 133.1, 129.3, 128.74, 128.75, 128.6, 127.8, 127.0,

126.1, 112.9, 56.7, 55.1, 49.4, 38.4; IR (film) 3028, 2930, 2835, 1601, 1513, 1492, 1452, 1248, 1179, 1092, 1035, 1012, 820, 749, 700  $\text{cm}^{-1}$ ; LRMS (EI): Mass calcd for  $\text{C}_{24}\text{H}_{21}\text{ClO}$  [ $\text{M}^+$ ]: 360, found [ $\text{M}^+$ ]: 360;  $[\alpha]_{\text{D}}^{20}$ : (*c* 0.70,  $\text{CHCl}_3$ ): +175.1; Enantiomeric ratio was measured by HPLC (Chiralcel AD-H, 1% IPA/Hexanes, 1.0 mL/min), Rt (*cis*) = 9.9 and 11.0 min, Rt (*trans*) = 17.9 and 21.6 min; ee *cis* = 99%.

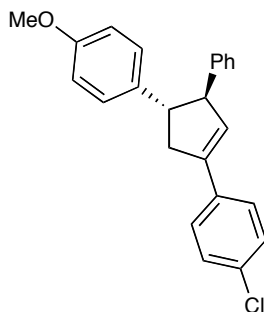

**(±)-*trans*-1-(4-Chlorophenyl)-4(*S*)-(4-methoxyphenyl)-3(*S*)-phenyl-cyclopent-1-ene**: Prepared according to the procedure reported by Nair<sup>10</sup> using cinnamaldehyde and (*E*)-1-(4-chlorophenyl)-3-(4-methoxyphenyl)prop-2-en-1-one and purified by flash chromatography using 1% EtOAc/hexanes. The compound was obtained in 60% yield (15:1 dr) as a colorless gum.  $^1\text{H}$  NMR (500 MHz,  $\text{CDCl}_3$ )  $\delta$  7.45 (ddd,  $J = 9.1, 2.5, 2.0$  Hz, 2H), 7.33 (ddd,  $J = 9.2, 2.5, 2.0$  Hz, 2H), 7.30-7.26 (m, 2H), 7.22 (tt,  $J = 7.3, 1.5$  Hz, 1H), 7.15 (ddd,  $J = 9.7, 3.1, 2.1$  Hz, 2H), 7.14-7.11 (m, 2H), 6.84 (ddd,  $J = 9.6, 3.0, 2.1$  Hz, 2H), 6.24 (dd,  $J = 3.6, 2.1$  Hz, 1H), 4.08 (ddd,  $J = 7.4, 4.6, 2.3$  Hz, 1H), 3.80 (s, 3H), 3.40 (ddd,  $J = 8.5, 7.7, 7.7$  Hz, 1H), 3.27 (dddd,  $J = 15.8, 8.8, 2.1, 1.5$  Hz, 1H), 2.95 (dddd,  $J = 15.7, 7.8, 2.4, 2.4$  Hz, 1H);  $^{13}\text{C}$  NMR (125 MHz,  $\text{CDCl}_3$ )  $\delta$  158.0, 144.6, 141.0, 137.0, 134.5, 133.1, 128.8, 128.6, 128.4, 128.2, 127.4, 127.0, 126.4, 113.8, 60.8, 55.2, 53.9, 42.0; IR (film) 3027, 2929, 2835, 1610, 1512, 1492, 1453, 1249, 1178, 1092, 1035, 1012, 821, 752, 700  $\text{cm}^{-1}$ ; LRMS (EI): Mass calcd for  $\text{C}_{24}\text{H}_{21}\text{ClO}$  [ $\text{M}^+$ ]: 360, found [ $\text{M}^+$ ]: 360.

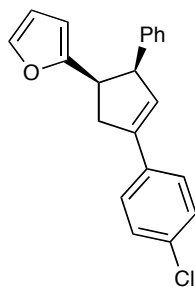

***cis*-1-(4-Chlorophenyl)-4(*R*)-(furan-2-yl)-3(*S*)-phenyl-cyclopent-1-ene (19)**: Prepared according to general procedure using cinnamaldehyde (19.5  $\mu\text{L}$ , 0.155 mmol) and (*E*)-1-(4-chlorophenyl)-3-(furan-2-yl)prop-2-en-1-one (109 mg, 0.465 mmol) and purified by flash chromatography using 1% EtOAc/hexanes to afford 33.5 mg (67% yield) of **17** (>20:1 dr) as a white solid.  $^1\text{H}$  NMR (500 MHz,  $\text{CDCl}_3$ )  $\delta$  7.49 (ddd,  $J = 9.1, 2.5, 1.9$  Hz, 2H), 7.35 (ddd,  $J = 9.2, 2.5, 1.9$  Hz, 2H), 7.14-7.09 (m, 3H), 7.08-7.06 (m, 1H), 6.98-6.95 (m, 2H), 6.31-6.29 (m, 1H), 6.04 (dd,  $J = 3.1, 1.9$  Hz, 1H), 5.74 (ddd,  $J = 3.2, 0.6, 0.6$  Hz, 1H), 4.37 (ddd,  $J = 8.7, 2.2, 2.2$  Hz, 1H), 4.10 (ddd,  $J = 8.7, 8.7, 8.7$  Hz, 1H), 3.11 (dddd,  $J = 15.6, 8.9, 2.2, 2.2$  Hz, 1H), 3.04 (dddd,  $J = 15.5, 8.6, 0.8, 0.8$  Hz, 1H);  $^{13}\text{C}$  NMR (125 MHz,  $\text{CDCl}_3$ )  $\delta$  155.4, 141.9, 140.7, 140.3, 134.3, 133.2, 128.7, 128.6, 128.3, 127.7, 127.0, 126.3, 109.7, 105.9, 55.5, 43.3, 36.6; IR (film)

3059, 3028, 2929, 2850, 1596, 1492, 1453, 1404, 1092, 1012, 822, 732, 701  $\text{cm}^{-1}$ ; LRMS (EI): Mass calcd for  $\text{C}_{21}\text{H}_{17}\text{ClO}$  [ $\text{M}^+$ ]: 320, found [ $\text{M}^+$ ]: 320;  $[\alpha]_{\text{D}}^{20}$ : (*c* 1.02,  $\text{CHCl}_3$ ): +205.0; Enantiomeric ratio was measured by HPLC (Chiralcel AD-H, 2% IPA/Hexanes, 0.5 mL/min), Rt (*cis*) = 10.9 and 11.5 min, Rt (*trans*) = 14.6 and 18.0 min; ee *cis* = 98%.

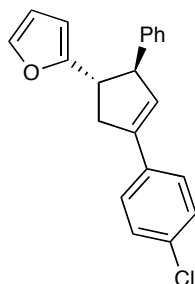

**(±)-*trans*-1-(4-Chlorophenyl)-4(S)-(furan-2-yl)-3(S)-phenyl-cyclopent-1-ene:** Prepared according to the procedure reported by Nair<sup>10</sup> using cinnamaldehyde and (*E*)-1-(4-chlorophenyl)-3-(furan-2-yl)prop-2-en-1-one and purified by flash chromatography using 1% EtOAc/hexanes. The compound was obtained in 74% yield (16:1 dr) as a white solid. <sup>1</sup>H NMR (500 MHz,  $\text{CDCl}_3$ )  $\delta$  7.46-7.42 (m, 2H), 7.38-7.36 (m, 1H), 7.35-7.29 (m, 4H), 7.26-7.19 (m, 3H), 6.32-6.29 (m, 1H), 6.23-6.20 (m, 1H), 6.06-6.04 (m, 1H), 4.26-4.21 (m, 1H), 3.53 (ddd, *J* = 8.3, 8.3, 8.3 Hz, 1H), 3.25-3.18 (m, 1H), 3.09-3.02 (m, 1H); <sup>13</sup>C NMR (125 MHz,  $\text{CDCl}_3$ )  $\delta$  157.1, 144.2, 141.3, 140.9, 134.3, 133.1, 128.6, 128.55, 128.49, 127.5, 127.0, 126.6, 110.1, 104.9, 57.4, 47.5, 39.0; IR (film) 3059, 3028, 2927, 2852, 1600, 1506, 1492, 1453, 1404, 1147, 1093, 1076, 1012, 817, 732, 700  $\text{cm}^{-1}$ ; LRMS (EI): Mass calcd for  $\text{C}_{21}\text{H}_{17}\text{ClO}$  [ $\text{M}^+$ ]: 320, found [ $\text{M}^+$ ]: 320.

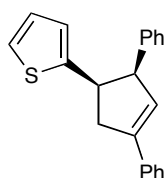

***cis*-1,3(S)-Diphenyl-4(R)-(thiophen-2-yl)-cyclopent-1-ene (20):** Prepared according to general procedure using cinnamaldehyde (20.8  $\mu\text{L}$ , 0.165 mmol) and (*E*)-1-(4-chlorophenyl)-3-(thiophen-2-yl)prop-2-en-1-one (106 mg, 0.495 mmol) and purified by flash chromatography using 1% EtOAc/hexanes to afford 25 mg (50% yield) of **18** (>20:1 dr) as a white solid. <sup>1</sup>H NMR (500 MHz,  $\text{CDCl}_3$ )  $\delta$  7.60-7.57 (m, 2H), 7.42-7.38 (m, 2H), 7.31 (tt, *J* = 7.4, 1.3, 1.3 Hz, 1H), 7.15-7.08 (m, 3H), 6.98-6.95 (m, 2H), 6.92 (dd, *J* = 5.1, 0.9 Hz, 1H), 6.71 (dd, *J* = 5.0, 3.5 Hz, 1H), 6.55 (m, 1H), 6.38-6.36 (m, 1H), 4.33-4.26 (m, 2H), 3.24-3.17 (m, 1H), 3.17-3.10 (m, 1H); <sup>13</sup>C NMR (125 MHz,  $\text{CDCl}_3$ )  $\delta$  145.2, 143.4, 140.1, 135.8, 128.9, 128.5, 128.1, 127.8, 127.6, 126.4, 126.0, 125.8, 124.7, 123.1, 56.9, 45.5, 40.1; IR (film) 3063, 3026, 2928, 2842, 1600, 1494, 1452, 1076, 1030, 757, 692  $\text{cm}^{-1}$ ; LRMS (EI): Mass calcd for  $\text{C}_{21}\text{H}_{18}\text{S}$  [ $\text{M}^+$ ]: 302, found [ $\text{M}^+$ ]: 302;  $[\alpha]_{\text{D}}^{20}$ : (*c* 1.01,  $\text{CHCl}_3$ ): +215.8; Enantiomeric ratio was measured by reverse phase HPLC (Chiralcel AD-RH, 60% MeCN/ $\text{H}_2\text{O}$ , 1.0 mL/min), Rt (*cis*) = 17.6 and 22.5 min, Rt (*trans*) = 20.3 and 41.2 min; ee *cis* = 98%.

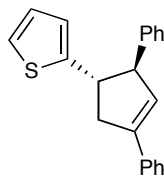

**(±)-*trans*-1,3(S)-Diphenyl-4(S)-(thiophen-2-yl)-cyclopent-1-ene**: Prepared according to the procedure reported by Nair<sup>10</sup> using cinnamaldehyde and (*E*)-1-(4-chlorophenyl)-3-(thiophen-2-yl)prop-2-en-1-one and purified by flash chromatography using 1% EtOAc/hexanes. The compound was obtained in 72% yield (>20:1 dr) as a yellow solid. <sup>1</sup>H NMR (500 MHz, CDCl<sub>3</sub>) δ 7.54-7.52 (m, 2H), 7.39-7.35 (m, 2H), 7.33-7.29 (m, 3H), 7.25-7.21 (m, 3H), 7.15 (dd, *J* = 5.1, 1.2 Hz, 1H), 6.92 (dd, *J* = 5.1, 3.5 Hz, 1H), 6.79 (ddd, *J* = 3.4, 1.1, 0.8 Hz, 1H), 6.24 (ddd, *J* = 2.2, 2.2, 1.3 Hz, 1H), 4.14 (ddd, *J* = 7.8, 4.4, 2.1 Hz, 1H), 3.74 (ddd, *J* = 8.2, 8.2, 8.2 Hz, 1H), 3.39 (dddd, *J* = 15.6, 8.6, 1.9, 1.4 Hz, 1H), 3.06 (dddd, *J* = 15.6, 8.3, 2.5, 2.5 Hz, 1H); <sup>13</sup>C NMR (125 MHz, CDCl<sub>3</sub>) δ 148.3, 144.0, 141.9, 135.7, 128.5, 128.1, 127.63, 127.58, 126.68, 126.65, 125.7, 123.7, 123.0, 61.1, 50.0, 42.6; IR (film) 3058, 3026, 2926, 2845, 1599, 1493, 1447, 1075, 1030, 753, 692 cm<sup>-1</sup>; LRMS (EI): Mass calcd for C<sub>21</sub>H<sub>18</sub>S [M<sup>+</sup>]: 302, found [M]<sup>+</sup>: 302

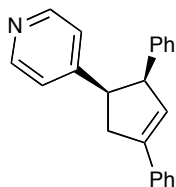

***cis*-1,3(S)-Diphenyl-4(R)-(pyridin-4-yl)-cyclopent-1-ene (21)**: Prepared according to general procedure using cinnamaldehyde (21.1 μL, 0.168 mmol) and (*E*)-1-(4-chlorophenyl)-3-phenylprop-2-en-1-one (105 mg, 0.504 mmol) and purified by flash chromatography using 30% EtOAc/hexanes to afford 39 mg (78% yield) of **19** (>20:1 dr) as a white solid. <sup>1</sup>H NMR (500 MHz, CDCl<sub>3</sub>) δ 8.25-8.22 (m, 2H), 7.61-7.58 (m, 2H), 7.44-7.40 (m, 2H), 7.33 (tt, *J* = 7.4, 1.5 Hz, 1H), 7.09-7.02 (m, 3H), 6.88-6.83 (m, 2H), 6.82-6.79 (m, 2H), 6.36 (dd, *J* = 4.2, 1.7 Hz, 1H), 4.42 (ddd, *J* = 8.6, 2.8, 1.5 Hz, 1H), 4.00 (ddd, *J* = 8.2, 8.2, 8.2 Hz, 1H), 3.18 (dddd, *J* = 15.7, 7.8, 1.9, 1.9 Hz, 1H), 3.14 (dddd, *J* = 15.7, 8.1, 1.4, 1.4 Hz, 1H); <sup>13</sup>C NMR (125 MHz, CDCl<sub>3</sub>) δ 150.8, 149.0, 143.4, 139.6, 135.6, 128.6, 128.5, 128.0, 127.8, 127.7, 126.6, 125.8, 123.7, 56.5, 49.3, 37.6; IR (film) 3057, 3026, 2927, 2848, 1598, 1493, 1451, 1415, 819, 757, 700 cm<sup>-1</sup>; LRMS (EI): Mass calcd for C<sub>22</sub>H<sub>19</sub>N [M<sup>+</sup>]: 297, found [M]<sup>+</sup>: 297; [α]<sub>D</sub><sup>20</sup>: (*c* 1.01, CHCl<sub>3</sub>): +222.2; Enantiomeric ratio was measured by HPLC (Chiralcel OD-H, 20% IPA/Hexanes, 1.0 mL/min), Rt (*cis*) = 9.9 and 27.4 min, Rt (*trans*) = 15.0 and 36.0 min; ee *cis* = 99%.

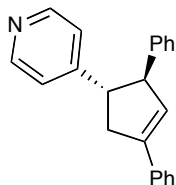

**(±)-*trans*-1,3(S)-Diphenyl-4(S)-(pyridin-4-yl)-cyclopent-1-ene**: Prepared according to the procedure reported by Nair<sup>10</sup> using cinnamaldehyde and (*E*)-1-(4-chlorophenyl)-3-phenylprop-2-en-1-one and purified by flash chromatography using 30% EtOAc/hexanes. The compound was obtained in 60% yield (>20:1 dr) as a colorless gum. <sup>1</sup>H NMR (500 MHz, CDCl<sub>3</sub>) δ 8.53-8.50 (m, 2H), 7.55-7.52 (m, 2H), 7.41-7.36 (m, 2H), 7.33-7.28 (m, 3H), 7.26-7.22 (m, 1H), 7.18-7.15

(m, 2H), 7.15-7.13 (m, 2H), 6.26 (dd,  $J = 3.8, 1.9$  Hz, 1H), 4.10 (ddd,  $J = 6.8, 4.6, 2.3$  Hz, 1H), 3.43 (ddd,  $J = 8.6, 6.9, 6.9$  Hz, 1H), 3.37 (dddd,  $J = 15.6, 8.8, 2.2, 1.5$  Hz, 1H), 3.00 (dddd,  $J = 15.5, 7.0, 2.3, 2.3$  Hz, 1H);  $^{13}\text{C}$  NMR (125 MHz,  $\text{CDCl}_3$ )  $\delta$  154.1, 150.0, 144.0, 142.0, 135.5, 128.6, 128.5, 127.8, 127.4, 127.0, 125.8, 122.6, 60.3, 53.6, 41.1; IR (film) 3058, 3026, 2926, 2849, 1597, 1494, 1448, 1414, 816, 755, 700  $\text{cm}^{-1}$ ; LRMS (EI): Mass calcd for  $\text{C}_{22}\text{H}_{19}\text{N}$  [ $\text{M}^+$ ]: 297.2, found [ $\text{M}$ ] $^+$ : 297.1

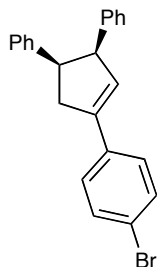

***cis*-1-(4-Bromophenyl)-3(*S*),4(*R*)-diphenylcyclopent-1-ene (22)**: Prepared according to general procedure using cinnamaldehyde (16.7  $\mu\text{L}$ , 0.133 mmol) and (*E*)-1-(4-bromophenyl)-3-phenylprop-2-en-1-one (115 mg, 0.400 mmol) and purified by flash chromatography using 0.75% EtOAc/hexanes to 1% EtOAc/hexanes to afford 40.5 mg (81% yield) of **20** (>20:1 dr) as a white solid.  $^1\text{H}$  NMR (500 MHz,  $\text{CDCl}_3$ )  $\delta$  7.52 (ddd,  $J = 8.9, 2.4, 2.0$  Hz, 2H), 7.46 (ddd,  $J = 8.9, 2.3, 2.0$  Hz, 2H), 7.07-6.98 (m, 6H), 6.89-6.86 (m, 2H), 6.83-6.80 (m, 2H), 6.37 (dd,  $J = 4.2, 1.7$  Hz, 1H), 4.34 (ddd,  $J = 8.6, 1.7, 1.7$  Hz, 1H), 4.05 (ddd,  $J = 8.4, 8.4, 8.4$  Hz, 1H), 3.15 (dddd,  $J = 15.6, 8.3, 2.0, 2.0$  Hz, 1H), 3.07 (dddd,  $J = 15.7, 8.2, 1.1, 1.1$  Hz, 1H);  $^{13}\text{C}$  NMR (125 MHz,  $\text{CDCl}_3$ )  $\delta$  142.7, 141.3, 140.3, 134.9, 131.6, 128.8, 128.7, 128.4, 127.7, 127.5, 127.3, 126.1, 125.9, 121.3, 56.8, 50.0, 38.0; IR (film) 3061, 3023, 2930, 2848, 1602, 1489, 1452, 1398, 1074, 1007, 816, 762, 698  $\text{cm}^{-1}$ ; LRMS (EI): Mass calcd for  $\text{C}_{23}\text{H}_{19}\text{Br}$  [ $\text{M}^+$ ]: 374, found [ $\text{M}$ ] $^+$ : 374;  $[\alpha]_D^{20}$ : (*c* 1.01,  $\text{CHCl}_3$ ): +209.4; Enantiomeric ratio was measured by reverse phase HPLC (Chiralcel OD-RH, 66% MeCN/ $\text{H}_2\text{O}$ , 1.0 mL/min),  $R_t$  (*cis*) = 51.5 and 71.3 min,  $R_t$  (*trans*) = 41.6 and 55.7 min; ee *cis* = 99%.

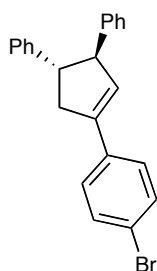

**(±)-*trans*-1-(4-Bromophenyl)-3(*S*),4(*S*)-diphenylcyclopent-1-ene**: Prepared according to the procedure reported by Nair<sup>10</sup> using cinnamaldehyde and (*E*)-1-(4-bromophenyl)-3-phenylprop-2-en-1-one and purified by flash chromatography using 0.75% EtOAc/hexanes. The compound was obtained in 85% yield (16:1 dr) as a white solid.  $^1\text{H}$  NMR (500 MHz,  $\text{CDCl}_3$ )  $\delta$  7.49 (ddd,  $J = 9.1, 2.4, 2.0$  Hz, 2H), 7.39 (ddd,  $J = 9.1, 2.4, 1.9$  Hz, 2H), 7.32-7.28 (m, 4H), 7.25-7.20 (m, 4H), 7.15-7.12 (m, 2H), 6.27 (dd,  $J = 3.7, 2.1$  Hz, 1H), 4.12 (ddd,  $J = 7.2, 4.6, 2.3$  Hz, 1H), 3.46 (ddd,  $J = 8.6, 7.5, 7.5$  Hz, 1H), 3.31 (dddd,  $J = 15.9, 8.8, 2.1, 1.6$  Hz, 1H), 2.98 (dddd,  $J = 15.8, 7.6, 2.3, 2.3$  Hz, 1H);  $^{13}\text{C}$  NMR (125 MHz,  $\text{CDCl}_3$ )  $\delta$  145.1, 144.5, 141.1, 134.8, 131.5, 128.50, 128.47, 127.4, 127.33, 127.28, 126.5, 126.3, 121.3, 60.8, 54.4, 41.9; IR (film) 3059, 3026, 2923,

2847, 1601, 1489, 1453, 1398, 1074, 1008, 816, 761, 698  $\text{cm}^{-1}$ ; LRMS (EI): Mass calcd for  $\text{C}_{23}\text{H}_{19}\text{Br}$  [ $\text{M}^+$ ]: 374, found [ $\text{M}^+$ ]: 374.

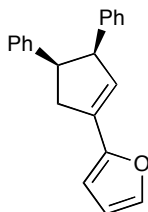

***cis*-1-(Furan-2-yl)-3(*S*),4(*R*)-diphenylcyclopent-1-ene (23)**: Prepared according to general procedure using cinnamaldehyde (21.9  $\mu\text{L}$ , 0.174 mmol) and (*E*)-1-(furan-2-yl)-3-phenylprop-2-en-1-one (103 mg, 0.522 mmol) and purified by flash chromatography using 4% EtOAc/hexanes to afford 37.5 mg (75% yield) of **21** (>20:1 dr) as a white solid.  $^1\text{H}$  NMR (500 MHz,  $\text{CDCl}_3$ )  $\delta$  7.46 (d,  $J = 1.3$  Hz, 1H), 7.07-6.98 (m, 6H), 6.87 (dd,  $J = 7.9, 1.6$  Hz, 2H), 6.84 (dd,  $J = 7.9, 1.7$  Hz, 2H), 6.47 (dd,  $J = 3.2, 1.8$  Hz, 1H), 6.37 (d,  $J = 3.2$  Hz, 1H), 6.28-6.25 (m, 1H), 4.35 (ddd,  $J = 8.5, 1.9, 1.9$  Hz, 1H), 4.02 (ddd,  $J = 8.3, 8.3, 8.3$  Hz, 1H), 3.08 (dddd,  $J = 15.5, 8.2, 1.7, 1.7$  Hz, 1H), 3.02 (dddd,  $J = 15.6, 8.2, 0.9, 0.9$  Hz, 1H);  $^{13}\text{C}$  NMR (125 MHz,  $\text{CDCl}_3$ )  $\delta$  151.7, 142.2, 141.3, 140.4, 134.0, 128.7, 128.4, 127.6, 127.5, 126.5, 126.0, 125.8, 111.2, 107.1, 56.6, 50.0, 37.3; IR (film) 3060, 3027, 2921, 2851, 1602, 1490, 1453, 995, 800, 760, 738, 698  $\text{cm}^{-1}$ ; LRMS (EI): Mass calcd for  $\text{C}_{21}\text{H}_{18}\text{O}$  [ $\text{M}^+$ ]: 286, found [ $\text{M}^+$ ]: 286;  $[\alpha]_{\text{D}}^{20}$ : (c 0.95,  $\text{CHCl}_3$ ): +233.1; Enantiomeric ratio was measured by reverse phase HPLC (Chiralcel OD-H, 2% IPA/hexanes, 1.0 mL/min), Rt (*cis*) = 6.8 and 15.5 min, Rt (*trans*) = 5.2 and 8.6 min; ee *cis* = 99%.

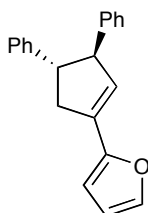

**(±)-*trans*-1-(Furan-2-yl)-3(*S*),4(*R*)-diphenylcyclopent-1-ene** Prepared according to the procedure reported by Nair<sup>10</sup> using cinnamaldehyde and (*E*)-1-(furan-2-yl)-3-phenylprop-2-en-1-one and purified by flash chromatography using 4% EtOAc/hexanes. The compound was obtained in 70% yield (8:1 dr) as a colorless gum.  $^1\text{H}$  NMR (500 MHz,  $\text{CDCl}_3$ )  $\delta$  7.43 (d,  $J = 1.6$  Hz, 1H), 7.32-7.26 (m, 4H), 7.25-7.19 (m, 4H), 7.15-7.12 (m, 2H), 6.43 (dd,  $J = 3.3, 1.9$  Hz, 1H), 6.30 (d,  $J = 3.3$  Hz, 1H), 6.16 (dd,  $J = 3.7, 1.8$  Hz, 1H), 4.13 (ddd,  $J = 6.9, 4.5, 2.2$  Hz, 1H), 3.41 (ddd,  $J = 8.6, 7.4, 7.4$  Hz, 1H), 3.25 (dddd,  $J = 15.8, 8.9, 1.9, 1.9$  Hz, 1H), 2.92 (dddd,  $J = 15.8, 7.6, 2.3, 2.3$  Hz, 1H);  $^{13}\text{C}$  NMR (125 MHz,  $\text{CDCl}_3$ )  $\delta$  145.0, 144.6, 142.1, 132.5, 128.5, 128.4, 127.4, 127.3, 126.7, 126.4, 126.3, 111.1, 107.0, 60.7, 54.5, 41.1; IR (film) 3060, 3027, 2912, 2851, 1601, 1492, 1453, 1154, 801, 761, 738, 699  $\text{cm}^{-1}$ ; LRMS (EI): Mass calcd for  $\text{C}_{21}\text{H}_{18}\text{O}$  [ $\text{M}^+$ ]: 286.1, found [ $\text{M}^+$ ]: 286.1.

**General Procedure for the Lewis Acid Catalyzed Enantioselective Synthesis of *cis*- $\gamma$ -butyrolactone 24**

Into a flame-dried 5 mL round bottom flask equipped with a magnetic stirbar was weighed (*R,R*)-TADDOL (18.7 mg, 0.04 mmol). The flask was purged with N<sub>2</sub> and toluene (1 mL), followed successively by Ti(O*i*Pr)<sub>4</sub> (11.8  $\mu$ L, 0.04 mmol), were added. The solution was heated to 103 °C for 4 hours and then cooled to 23 °C. Toluene was removed under vacuum. The residue was azeotroped twice with toluene, and the flask was dried under high vacuum for 1 hour. Into an oven-dried vial was weighed the azolium salt (10.2 mg, 0.04 mmol) in a nitrogen-filled drybox. The vial was capped, removed from the drybox and put under positive N<sub>2</sub> pressure. The azolium salt was dissolved in 375  $\mu$ L CH<sub>2</sub>Cl<sub>2</sub> and transferred to the flask via canula. The vial was rinsed with an additional 375  $\mu$ L CH<sub>2</sub>Cl<sub>2</sub> and the solution was transferred to the flask via canula. Finally, the reaction mixture was adjusted to the appropriate temperature before the successive addition of cinnamaldehyde (25  $\mu$ L, 0.2 mmol), *i*PrOH (3  $\mu$ L, 0.03 mmol) and DBU (4.5  $\mu$ L, 0.03 mmol). Upon consumption of the aldehyde (or after satisfactory conversion), the reaction mixture was filtered through a short plug of SiO<sub>2</sub> (in a pipette) and washed with EtOAc. The solution was then concentrated under reduced pressure and purified by flash chromatography with EtOAc/hexanes to afford the *cis*- $\gamma$ -butyrolactones.<sup>11</sup> Enantiomeric ratio was measured by HPLC (Chiralcel AD-H, 5% IPA/hexanes, 1.0 mL/min), Rt (*cis*) = 13.9 and 16.2 min; ee *cis* = 60%.

---

11. Sohn, S. S.; Rosen, E. L.; Bode, J. W. *J. Am. Chem. Soc.* **2004**, *126*, 14370-14371 (Supporting Information).



## HPLC Traces of Racemic and Enantioenriched Cyclopentenes

### Racemic 3

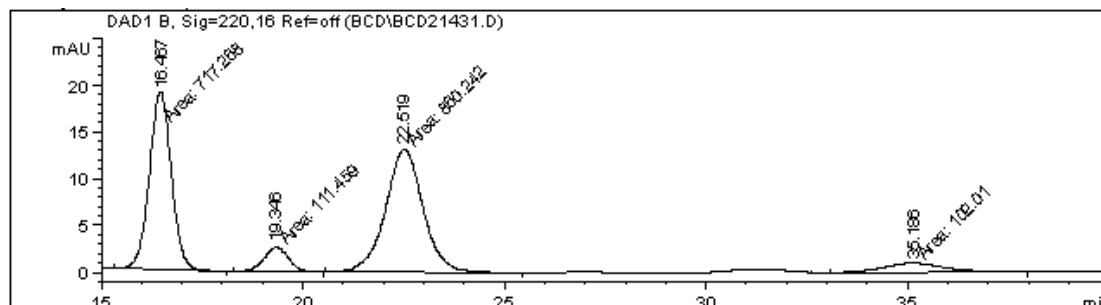

=====  
 Area Percent Report  
 =====

Sorted By : Signal  
 Multiplier : 1.0000  
 Dilution : 1.0000  
 Sample Amount : 1.00000 [ng/ul] (not used in calc.)  
 Use Multiplier & Dilution Factor with ISTDs

Signal 1: DAD1 B, Sig=220,16 Ref=off

| Peak # | RetTime [min] | Type | Width [min] | Area [mAU*s] | Height [mAU] | Area %  |
|--------|---------------|------|-------------|--------------|--------------|---------|
| 1      | 16.467        | MM   | 0.6327      | 717.26825    | 18.89365     | 40.0490 |
| 2      | 19.346        | MM   | 0.7166      | 111.45865    | 2.59238      | 6.2233  |
| 3      | 22.519        | MM   | 1.0948      | 860.24158    | 13.09566     | 48.0319 |
| 4      | 35.186        | MM   | 1.8224      | 102.01012    | 9.32915e-1   | 5.6958  |

### Enantioenriched 3 crude

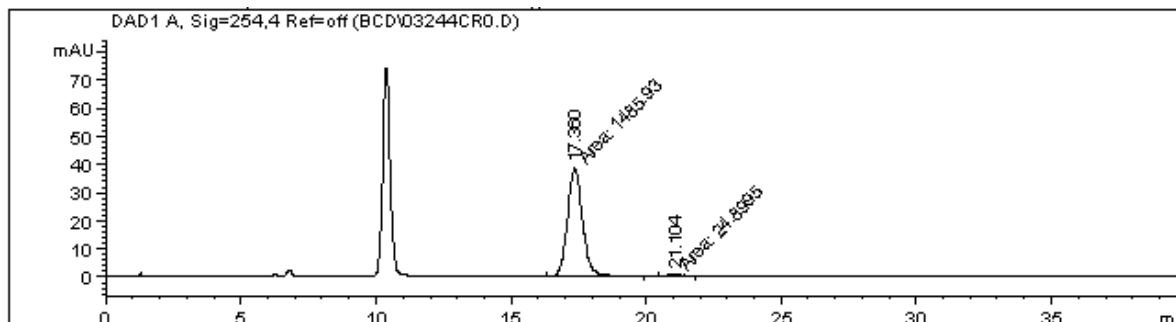

=====  
 Area Percent Report  
 =====

Sorted By : Signal  
 Multiplier : 1.0000  
 Dilution : 1.0000  
 Sample Amount : 1.00000 [ng/ul] (not used in calc.)  
 Use Multiplier & Dilution Factor with ISTDs

Signal 1: DAD1 A, Sig=254,4 Ref=off

| Peak # | RetTime [min] | Type | Width [min] | Area [mAU*s] | Height [mAU] | Area %  |
|--------|---------------|------|-------------|--------------|--------------|---------|
| 1      | 17.360        | MM   | 0.6425      | 1485.92578   | 38.54806     | 98.3519 |
| 2      | 21.104        | MM   | 0.6652      | 24.89951     | 6.23875e-1   | 1.6481  |

### Enantioenriched 3 pure

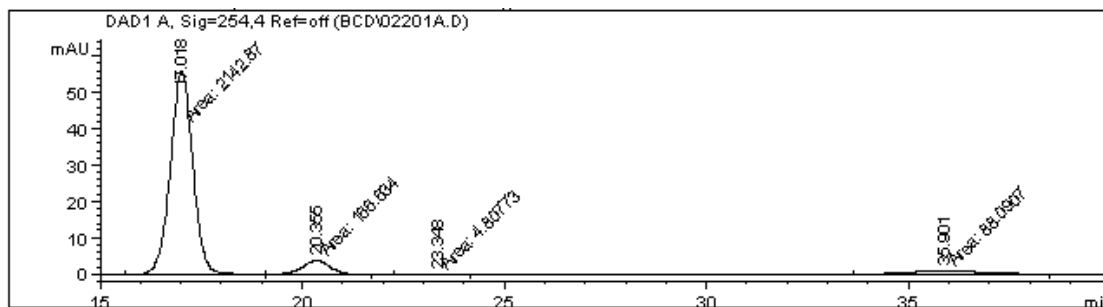

=====  
 Area Percent Report  
 =====

Sorted By : Simal  
 Multiplier : 1.0000  
 Dilution : 1.0000  
 Sample Amount : 1.00000 [ng/ul] (not used in calc.)  
 Use Multiplier & Dilution Factor with ISTDs

Signal 1: DAD1 A, Sig=254,4 Ref=off

| Peak # | RetTime [min] | Type | Width [min] | Area [mAU*s] | Height [mAU] | Area %  |
|--------|---------------|------|-------------|--------------|--------------|---------|
| 1      | 17.018        | MM   | 0.6416      | 2142.87158   | 55.66506     | 89.1970 |
| 2      | 20.355        | MM   | 0.7451      | 166.63391    | 3.72748      | 6.9361  |
| 3      | 23.348        | MM   | 0.8957      | 4.80773      | 8.94600e-2   | 0.2001  |
| 4      | 35.901        | MM   | 1.7946      | 88.09068     | 8.18131e-1   | 3.6668  |

### Racemic 4

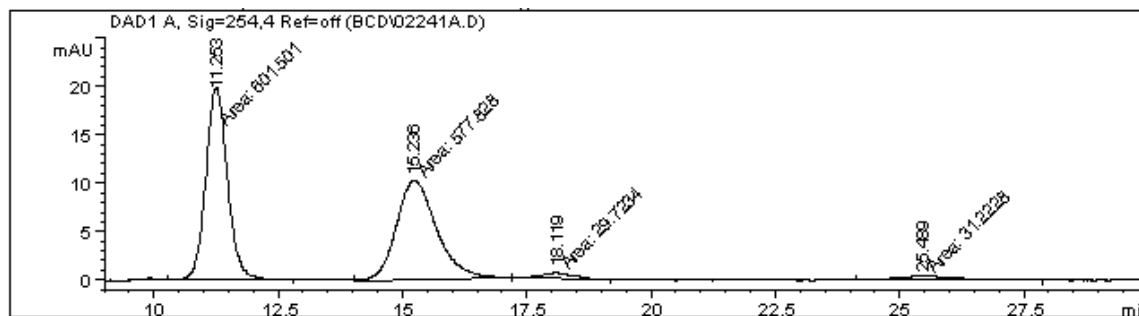

=====  
 Area Percent Report  
 =====

Sorted By : Simal  
 Multiplier : 1.0000  
 Dilution : 1.0000  
 Sample Amount : 1.00000 [ng/ul] (not used in calc.)  
 Use Multiplier & Dilution Factor with ISTDs

Signal 1: DAD1 A, Sig=254,4 Ref=off

| Peak # | RetTime [min] | Type | Width [min] | Area [mAU*s] | Height [mAU] | Area %  |
|--------|---------------|------|-------------|--------------|--------------|---------|
| 1      | 11.253        | MM   | 0.5048      | 601.50092    | 19.85799     | 48.4974 |
| 2      | 15.236        | MM   | 0.9399      | 577.82825    | 10.24583     | 46.5887 |
| 3      | 18.119        | MM   | 0.8030      | 29.72342     | 6.16935e-1   | 2.3965  |
| 4      | 25.489        | MM   | 1.5232      | 31.22280     | 3.41640e-1   | 2.5174  |

**Enantioenriched 4 crude**

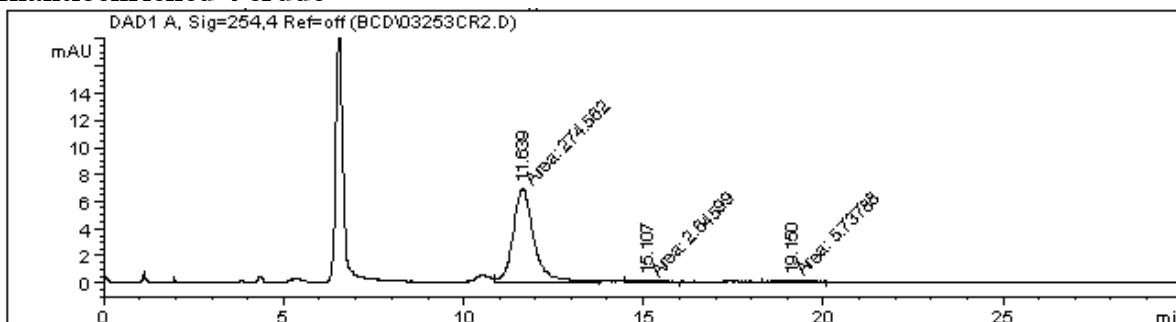

=====  
 Area Percent Report  
 =====

Sorted By : Signal  
 Multiplier : 1.0000  
 Dilution : 1.0000  
 Sample Amount : 1.00000 [ng/ul] (not used in calc.)  
 Use Multiplier & Dilution Factor with ISTDs

Signal 1: DAD1 A, Sig=254,4 Ref=off

| Peak # | RetTime [min] | Type | Width [min] | Area [mAU*s] | Height [mAU] | Area %  |
|--------|---------------|------|-------------|--------------|--------------|---------|
| 1      | 11.639        | MM   | 0.6642      | 274.56232    | 6.88929      | 97.0369 |
| 2      | 15.107        | MM   | 0.6436      | 2.64599      | 6.85242e-2   | 0.9352  |
| 3      | 19.150        | MM   | 0.7536      | 5.73788      | 1.26897e-1   | 2.0279  |

**Enantioenriched 4 pure**

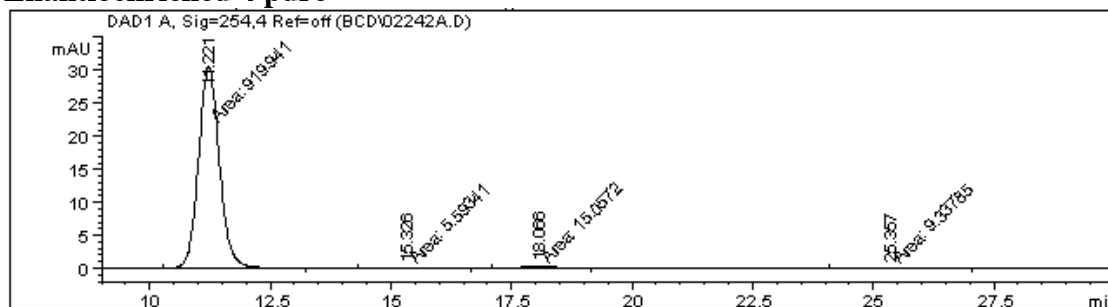

=====  
 Area Percent Report  
 =====

Sorted By : Signal  
 Multiplier : 1.0000  
 Dilution : 1.0000  
 Sample Amount : 1.00000 [ng/ul] (not used in calc.)  
 Use Multiplier & Dilution Factor with ISTDs

Signal 1: DAD1 A, Sig=254,4 Ref=off

| Peak # | RetTime [min] | Type | Width [min] | Area [mAU*s] | Height [mAU] | Area %  |
|--------|---------------|------|-------------|--------------|--------------|---------|
| 1      | 11.221        | MM   | 0.5027      | 919.94141    | 30.50292     | 96.8431 |
| 2      | 15.326        | MM   | 0.9861      | 5.59341      | 9.45380e-2   | 0.5888  |
| 3      | 18.066        | MM   | 0.8237      | 15.05724     | 3.04674e-1   | 1.5851  |
| 4      | 25.357        | MM   | 1.4382      | 9.33785      | 1.08215e-1   | 0.9830  |

**Racemic 5**

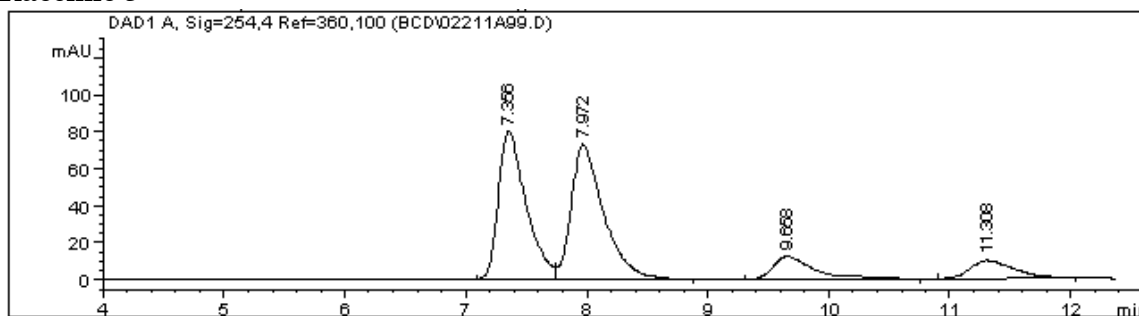

=====  
 Area Percent Report  
 =====

Sorted By : Signal  
 Multiplier : 1.0000  
 Dilution : 1.0000  
 Use Multiplier & Dilution Factor with ISTDs

Signal 1: DAD1 A, Sig=254,4 Ref=360,100

| Peak # | RetTime [min] | Type | Width [min] | Area [mAU*s] | Height [mAU] | Area %  |
|--------|---------------|------|-------------|--------------|--------------|---------|
| 1      | 7.356         | BV   | 0.2376      | 1277.97278   | 80.32507     | 40.3492 |
| 2      | 7.972         | VB   | 0.2751      | 1355.85718   | 72.85351     | 42.8082 |
| 3      | 9.658         | PP   | 0.3442      | 287.41550    | 12.22820     | 9.0745  |
| 4      | 11.308        | BB   | 0.3880      | 246.03831    | 9.63251      | 7.7681  |

**Enantioenriched 5**

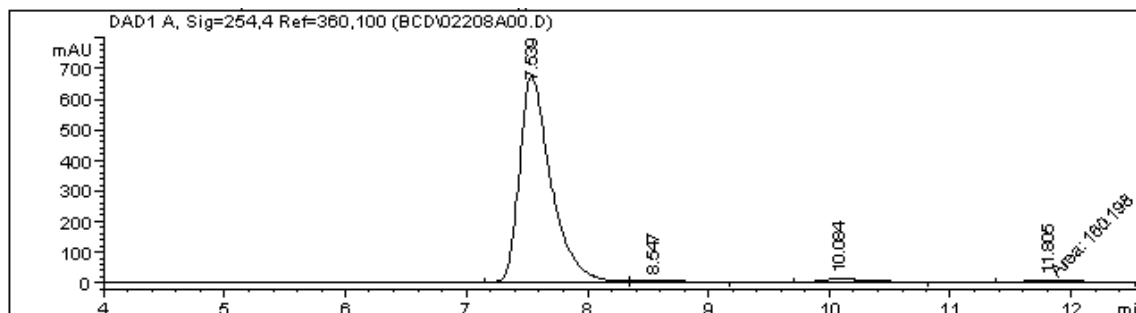

=====  
 Area Percent Report  
 =====

Sorted By : Signal  
 Multiplier : 1.0000  
 Dilution : 1.0000  
 Use Multiplier & Dilution Factor with ISTDs

Signal 1: DAD1 A, Sig=254,4 Ref=360,100

| Peak # | RetTime [min] | Type | Width [min] | Area [mAU*s] | Height [mAU] | Area %  |
|--------|---------------|------|-------------|--------------|--------------|---------|
| 1      | 7.539         | BV   | 0.2675      | 1.22581e4    | 676.15051    | 95.0936 |
| 2      | 8.547         | VB   | 0.3283      | 154.65965    | 7.03867      | 1.1998  |
| 3      | 10.084        | PB   | 0.3458      | 317.60248    | 13.33681     | 2.4638  |
| 4      | 11.805        | MM   | 0.4719      | 160.19814    | 5.65779      | 1.2428  |

**Racemic 6**

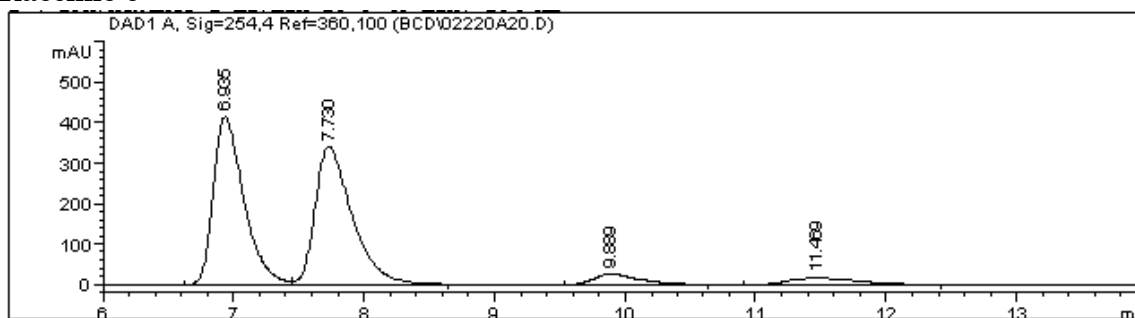

=====  
 Area Percent Report  
 =====

Sorted By : Signal  
 Multiplier : 1.0000  
 Dilution : 1.0000  
 Use Multiplier & Dilution Factor with ISTDs

Signal 1: DAD1 A, Sig=254,4 Ref=360,100

| Peak # | RetTime [min] | Type | Width [min] | Area [mAU*s] | Height [mAU] | Area %  |
|--------|---------------|------|-------------|--------------|--------------|---------|
| 1      | 6.935         | PV   | 0.2453      | 6716.29004   | 413.81976    | 46.1280 |
| 2      | 7.730         | VB   | 0.2970      | 6679.77246   | 340.33453    | 45.8772 |
| 3      | 9.889         | EB   | 0.3530      | 602.83875    | 25.38891     | 4.1403  |
| 4      | 11.469        | PB   | 0.5096      | 561.20276    | 16.22188     | 3.8544  |

**Enantioenriched 6**

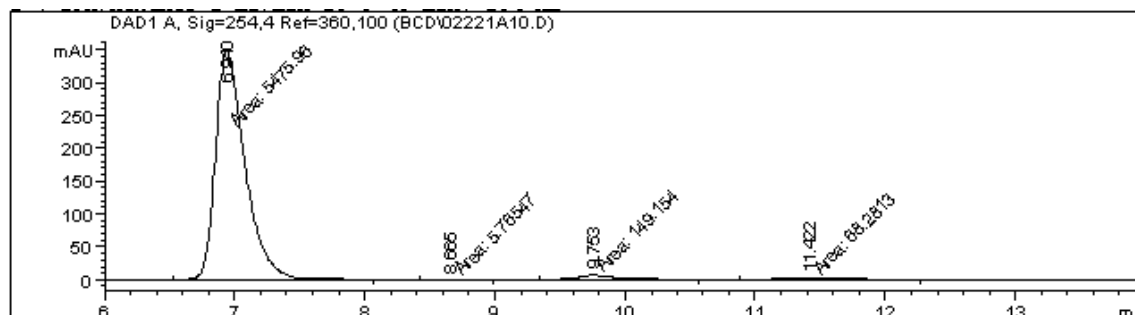

=====  
 Area Percent Report  
 =====

Sorted By : Signal  
 Multiplier : 1.0000  
 Dilution : 1.0000  
 Use Multiplier & Dilution Factor with ISTDs

Signal 1: DAD1 A, Sig=254,4 Ref=360,100

| Peak # | RetTime [min] | Type | Width [min] | Area [mAU*s] | Height [mAU] | Area %  |
|--------|---------------|------|-------------|--------------|--------------|---------|
| 1      | 6.940         | MM   | 0.2632      | 5475.95850   | 346.77090    | 96.0836 |
| 2      | 8.665         | MM   | 0.3497      | 5.76547      | 2.74801e-1   | 0.1012  |
| 3      | 9.753         | MM   | 0.3710      | 149.15411    | 6.70124      | 2.6171  |
| 4      | 11.422        | MM   | 0.5959      | 68.28135     | 1.90984      | 1.1981  |

**Racemic 7**

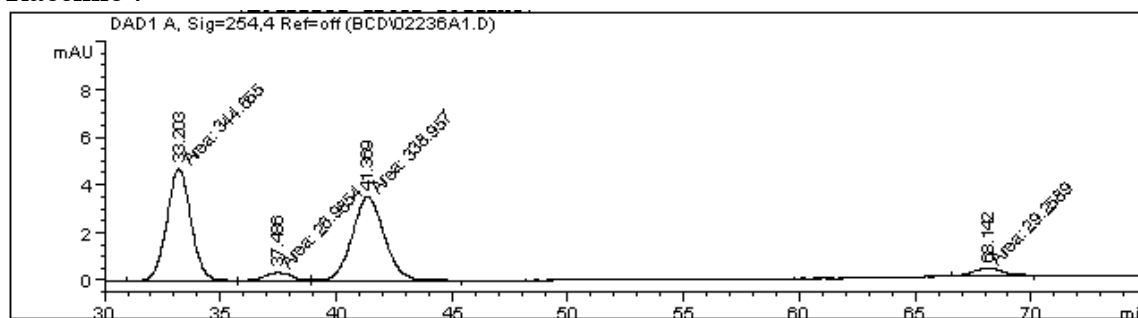

=====  
 Area Percent Report  
 =====

Sorted By : Signal  
 Multiplier : 1.0000  
 Dilution : 1.0000  
 Sample Amount : 1.00000 [ng/ul] (not used in calc.)  
 Use Multiplier & Dilution Factor with ISTDs

Signal 1: DAD1 A, Sig=254,4 Ref=off

| Peak # | RetTime [min] | Type | Width [min] | Area [mAU*s] | Height [mAU] | Area %  |
|--------|---------------|------|-------------|--------------|--------------|---------|
| 1      | 33.203        | MM   | 1.2213      | 344.65527    | 4.70356      | 46.5841 |
| 2      | 37.486        | MM   | 1.2862      | 26.98541     | 3.49667e-1   | 3.6474  |
| 3      | 41.369        | MM   | 1.6144      | 338.95657    | 3.49920      | 45.8138 |
| 4      | 68.142        | MM   | 1.4907      | 29.25893     | 3.27124e-1   | 3.9547  |

**Enantioenriched 7**

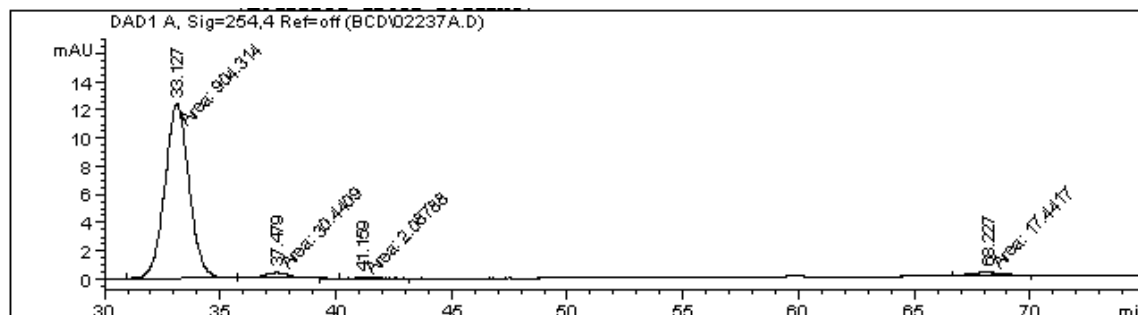

=====  
 Area Percent Report  
 =====

Sorted By : Signal  
 Multiplier : 1.0000  
 Dilution : 1.0000  
 Sample Amount : 1.00000 [ng/ul] (not used in calc.)  
 Use Multiplier & Dilution Factor with ISTDs

Signal 1: DAD1 A, Sig=254,4 Ref=off

| Peak # | RetTime [min] | Type | Width [min] | Area [mAU*s] | Height [mAU] | Area %  |
|--------|---------------|------|-------------|--------------|--------------|---------|
| 1      | 0.062         | BB   | 0.0670      | 5.68025      | 1.20433      | 0.5917  |
| 2      | 33.127        | MM   | 1.2194      | 904.31415    | 12.35962     | 94.2028 |
| 3      | 37.479        | MM   | 1.3160      | 30.44087     | 3.85527e-1   | 3.1710  |
| 4      | 41.159        | MM   | 1.3407      | 2.08788      | 2.59550e-2   | 0.2175  |
| 5      | 68.227        | MM   | 1.5216      | 17.44173     | 1.91049e-1   | 1.8169  |

**Racemic 8**

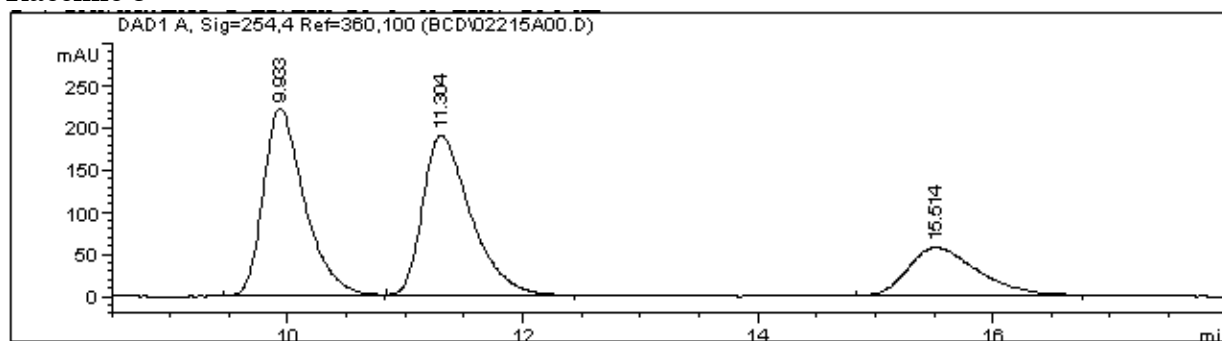

=====  
 Area Percent Report  
 =====

Sorted By : Signal  
 Multiplier : 1.0000  
 Dilution : 1.0000  
 Use Multiplier & Dilution Factor with ISTDs

Signal 1: DAD1 A, Sig=254,4 Ref=360,100

| Peak # | RetTime [min] | Type | Width [min] | Area [mAU*s] | Height [mAU] | Area %  |
|--------|---------------|------|-------------|--------------|--------------|---------|
| 1      | 9.933         | BB   | 0.3705      | 5480.23486   | 223.13065    | 41.0755 |
| 2      | 11.304        | BB   | 0.4317      | 5462.43652   | 190.99648    | 40.9421 |
| 3      | 15.514        | BB   | 0.6179      | 2399.17187   | 57.60524     | 17.9823 |

**Enantioenriched 8**

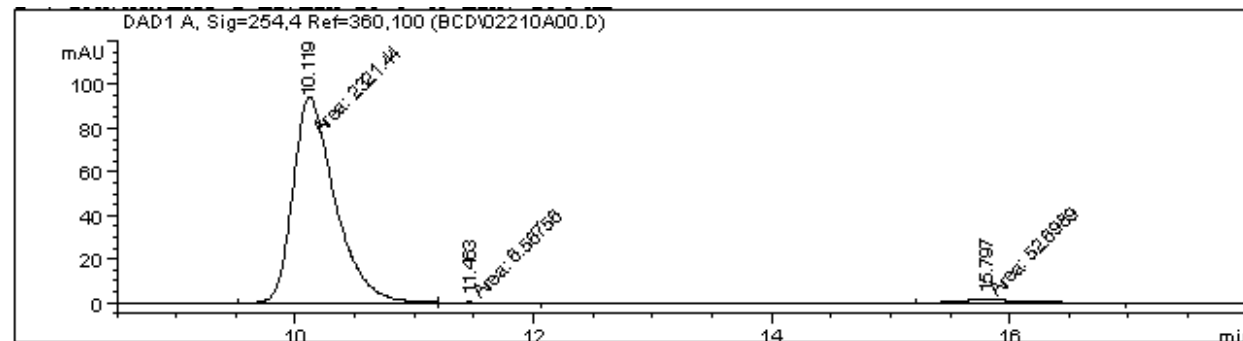

=====  
 Area Percent Report  
 =====

Sorted By : Signal  
 Multiplier : 1.0000  
 Dilution : 1.0000  
 Use Multiplier & Dilution Factor with ISTDs

Signal 1: DAD1 A, Sig=254,4 Ref=360,100

| Peak # | RetTime [min] | Type | Width [min] | Area [mAU*s] | Height [mAU] | Area %  |
|--------|---------------|------|-------------|--------------|--------------|---------|
| 1      | 10.119        | MM   | 0.4105      | 2321.44165   | 94.25790     | 97.5106 |
| 2      | 11.463        | MM   | 0.4601      | 6.56756      | 2.37881e-1   | 0.2759  |
| 3      | 15.797        | MM   | 0.6886      | 52.69886     | 1.27552      | 2.2136  |

**Racemic 9**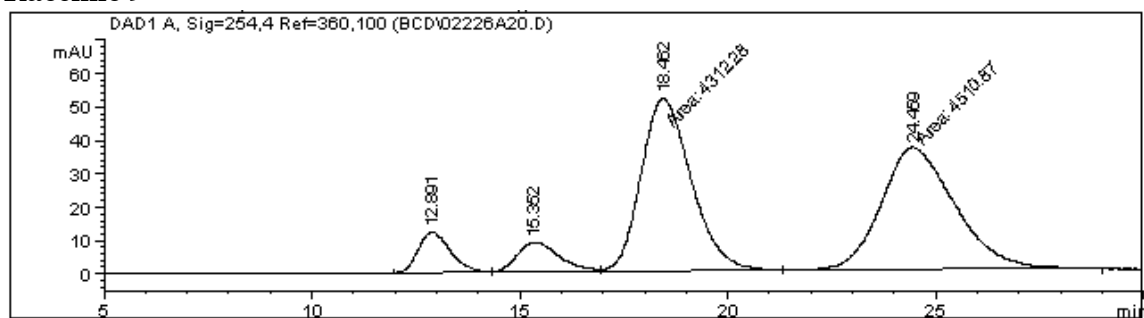

```

=====
                          Area Percent Report
=====
  
```

```

Sorted By      :      Signal
Multiplier     :      1.0000
Dilution      :      1.0000
Use Multiplier & Dilution Factor with ISTDs
  
```

Signal 1: DAD1 A, Sig=254,4 Ref=360,100

| Peak # | RetTime [min] | Type | Width [min] | Area [mAU*s] | Height [mAU] | Area %  |
|--------|---------------|------|-------------|--------------|--------------|---------|
| 1      | 12.891        | BB   | 0.7255      | 658.35364    | 12.12434     | 6.5213  |
| 2      | 15.352        | BV   | 0.8307      | 613.93646    | 8.79221      | 6.0813  |
| 3      | 18.462        | MM   | 1.3972      | 4312.28369   | 51.44059     | 42.7151 |
| 4      | 24.459        | MM   | 2.0621      | 4510.87402   | 36.45927     | 44.6823 |

**Enantioenriched 9**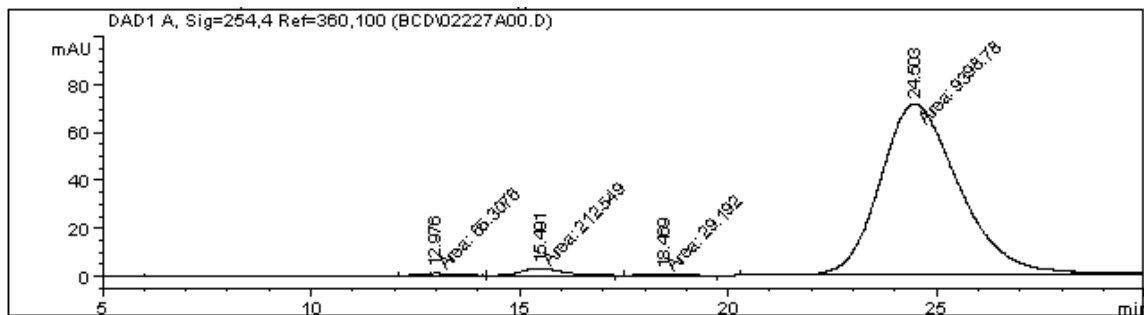

```

=====
                          Area Percent Report
=====
  
```

```

Sorted By      :      Signal
Multiplier     :      1.0000
Dilution      :      1.0000
Use Multiplier & Dilution Factor with ISTDs
  
```

Signal 1: DAD1 A, Sig=254,4 Ref=360,100

| Peak # | RetTime [min] | Type | Width [min] | Area [mAU*s] | Height [mAU] | Area %  |
|--------|---------------|------|-------------|--------------|--------------|---------|
| 1      | 12.976        | MM   | 0.9196      | 65.30757     | 1.18357      | 0.6729  |
| 2      | 15.491        | MM   | 1.2187      | 212.54945    | 2.90687      | 2.1899  |
| 3      | 18.469        | MM   | 1.0353      | 29.19200     | 4.69929e-1   | 0.3008  |
| 4      | 24.503        | MM   | 2.1930      | 9398.77539   | 71.42878     | 96.8364 |



**Racemic 10**

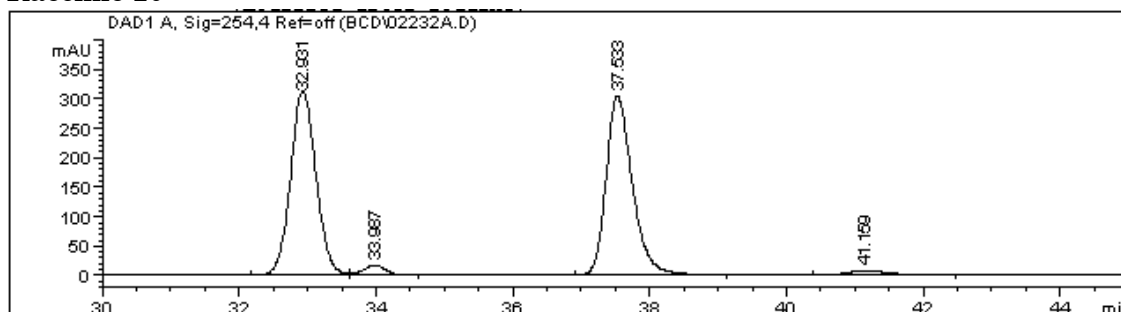

=====  
 Area Percent Report  
 =====

Sorted By : Signal  
 Multiplier : 1.0000  
 Dilution : 1.0000  
 Sample Amount : 1.00000 [ng/ul] (not used in calc.)  
 Use Multiplier & Dilution Factor with ISTDs

Signal 1: DAD1 A, Sig=254,4 Ref=off

| Peak # | RetTime [min] | Type | Width [min] | Area [mAU*s] | Height [mAU] | Area %  |
|--------|---------------|------|-------------|--------------|--------------|---------|
| 1      | 32.931        | PV   | 0.3959      | 8058.45801   | 313.51309    | 47.7027 |
| 2      | 33.987        | VB   | 0.3475      | 386.33835    | 16.97658     | 2.2870  |
| 3      | 37.533        | PB   | 0.4075      | 8117.03516   | 304.01776    | 48.0495 |
| 4      | 41.159        | PB   | 0.6697      | 331.25137    | 7.10825      | 1.9609  |

Totals : 1.68931e4 641.61569

**Enantioenriched 10**

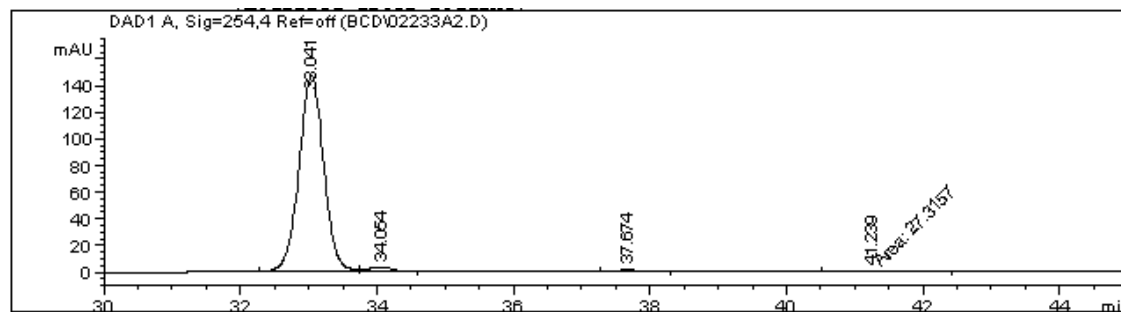

=====  
 Area Percent Report  
 =====

Sorted By : Signal  
 Multiplier : 1.0000  
 Dilution : 1.0000  
 Sample Amount : 1.00000 [ng/ul] (not used in calc.)  
 Use Multiplier & Dilution Factor with ISTDs

Signal 1: DAD1 A, Sig=254,4 Ref=off

| Peak # | RetTime [min] | Type | Width [min] | Area [mAU*s] | Height [mAU] | Area %  |
|--------|---------------|------|-------------|--------------|--------------|---------|
| 1      | 33.041        | BV   | 0.3856      | 3697.53979   | 146.90964    | 96.6747 |
| 2      | 34.054        | VB   | 0.3467      | 77.99287     | 3.41224      | 2.0392  |
| 3      | 37.674        | BB   | 0.3944      | 21.87334     | 7.96395e-1   | 0.5719  |
| 4      | 41.239        | MM   | 0.7950      | 27.31570     | 5.72662e-1   | 0.7142  |

**Racemic 12**

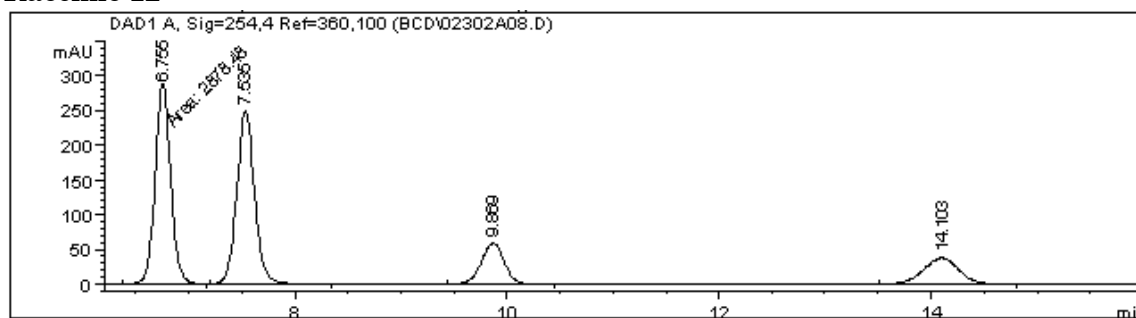

=====  
 Area Percent Report  
 =====

Sorted By : Signal  
 Multiplier : 1.0000  
 Dilution : 1.0000  
 Use Multiplier & Dilution Factor with ISTDs

Signal 1: DAD1 A, Sig=254,4 Ref=360,100

| Peak # | RetTime [min] | Type | Width [min] | Area [mAU*s] | Height [mAU] | Area %  |
|--------|---------------|------|-------------|--------------|--------------|---------|
| 1      | 6.755         | MM   | 0.1669      | 2878.48169   | 287.39407    | 38.3667 |
| 2      | 7.535         | VB   | 0.1779      | 2894.31812   | 248.51944    | 38.5778 |
| 3      | 9.869         | BB   | 0.2290      | 869.94189    | 58.65942     | 11.5953 |
| 4      | 14.103        | BB   | 0.3640      | 859.81378    | 37.15264     | 11.4603 |

**Enantioenriched 12**

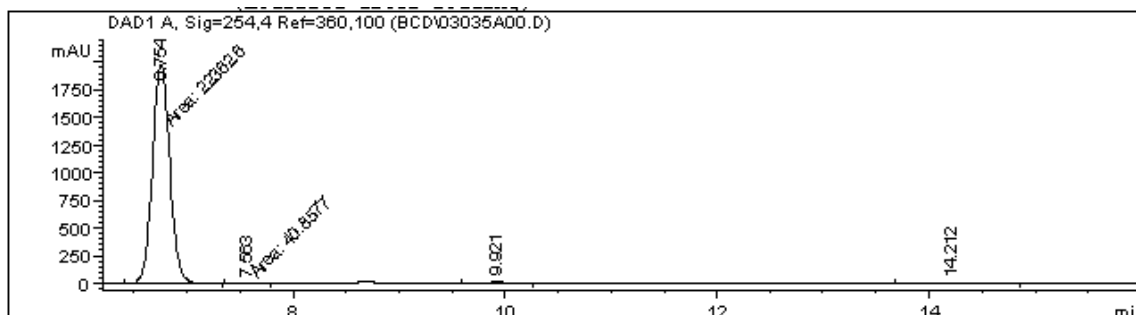

=====  
 Area Percent Report  
 =====

Sorted By : Signal  
 Multiplier : 1.0000  
 Dilution : 1.0000  
 Use Multiplier & Dilution Factor with ISTDs

Signal 1: DAD1 A, Sig=254,4 Ref=360,100

| Peak # | RetTime [min] | Type | Width [min] | Area [mAU*s] | Height [mAU] | Area %  |
|--------|---------------|------|-------------|--------------|--------------|---------|
| 1      | 6.754         | MM   | 0.1895      | 2.23626e4    | 1966.67505   | 97.8706 |
| 2      | 7.562         | MM   | 0.1835      | 40.85771     | 3.71179      | 0.1788  |
| 3      | 9.921         | BV   | 0.2330      | 247.83131    | 16.33710     | 1.0846  |
| 4      | 14.212        | BB   | 0.3441      | 197.86414    | 8.61168      | 0.8660  |

**Racemic 13**

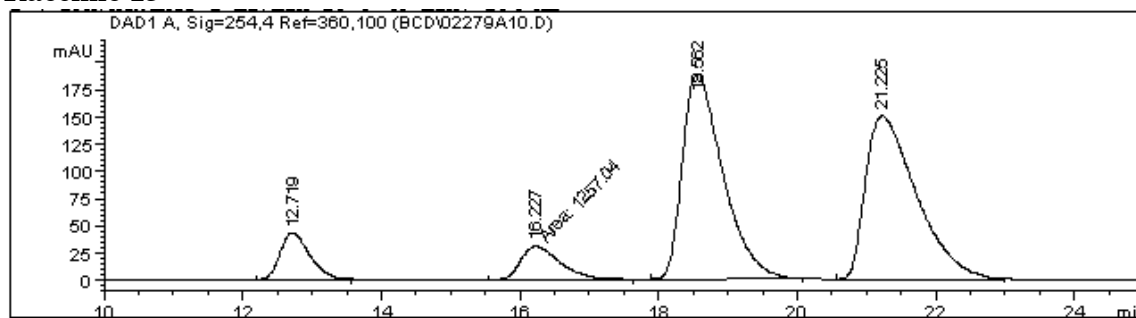

=====  
Area Percent Report  
=====

Sorted By : Signal  
Multiplier : 1.0000  
Dilution : 1.0000  
Use Multiplier & Dilution Factor with ISTDs

Signal 1: DAD1 A, Sig=254,4 Ref=360,100

| Peak # | RetTime [min] | Type | Width [min] | Area [mAU*s] | Height [mAU] | Area %  |
|--------|---------------|------|-------------|--------------|--------------|---------|
| 1      | 12.719        | BB   | 0.4585      | 1286.46448   | 43.32076     | 7.1870  |
| 2      | 16.227        | MM   | 0.6775      | 1257.03699   | 30.92189     | 7.0226  |
| 3      | 18.562        | BB   | 0.6178      | 7682.71875   | 188.39708    | 42.9205 |
| 4      | 21.225        | PB   | 0.7611      | 7673.66406   | 149.93076    | 42.8699 |

**Enantioenriched 13**

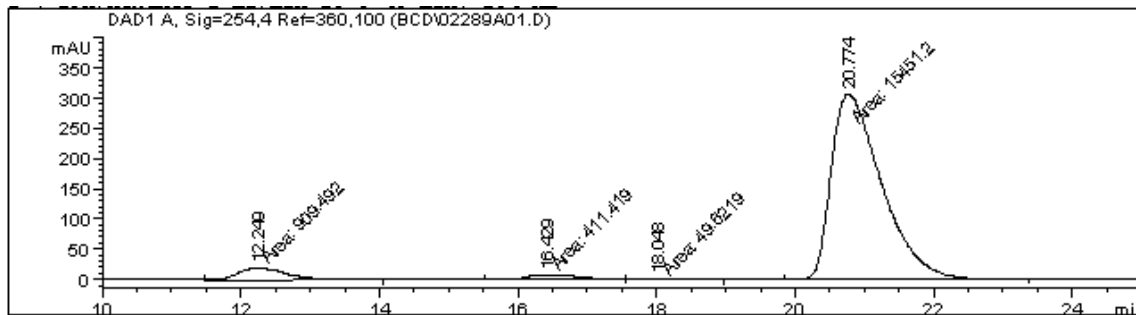

=====  
Area Percent Report  
=====

Sorted By : Signal  
Multiplier : 1.0000  
Dilution : 1.0000  
Use Multiplier & Dilution Factor with ISTDs

Signal 1: DAD1 A, Sig=254,4 Ref=360,100

| Peak # | RetTime [min] | Type | Width [min] | Area [mAU*s] | Height [mAU] | Area %  |
|--------|---------------|------|-------------|--------------|--------------|---------|
| 1      | 12.249        | MM   | 0.7723      | 909.49176    | 19.62820     | 5.4067  |
| 2      | 16.429        | MM   | 0.7869      | 411.41891    | 8.71359      | 2.4458  |
| 3      | 18.048        | MM   | 0.7183      | 49.62189     | 1.15130      | 0.2950  |
| 4      | 20.774        | MM   | 0.8402      | 1.54512e4    | 306.48352    | 91.8526 |

**Racemic 14**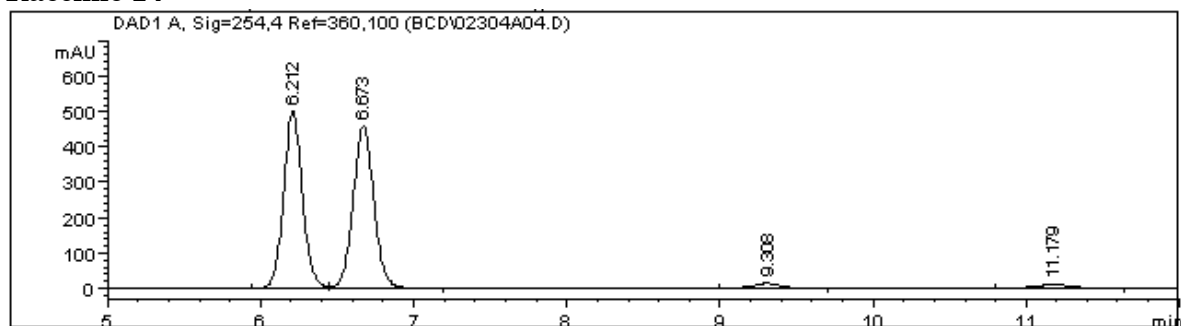

```

=====
                          Area Percent Report
=====
  
```

```

Sorted By      :      Signal
Multiplier     :      1.0000
Dilution       :      1.0000
Use Multiplier & Dilution Factor with ISTDs
  
```

Signal 1: DAD1 A, Sig=254,4 Ref=360,100

| Peak # | RetTime [min] | Type | Width [min] | Area [mAU*s] | Height [mAU] | Area %  |
|--------|---------------|------|-------------|--------------|--------------|---------|
| 1      | 6.212         | BV   | 0.1314      | 4275.11963   | 501.65204    | 47.7011 |
| 2      | 6.673         | VB   | 0.1453      | 4303.37109   | 459.39783    | 48.0163 |
| 3      | 9.308         | BP   | 0.2010      | 191.21338    | 14.58192     | 2.1335  |
| 4      | 11.179        | VB   | 0.2447      | 192.61298    | 12.16867     | 2.1491  |

**Enantioenriched 14**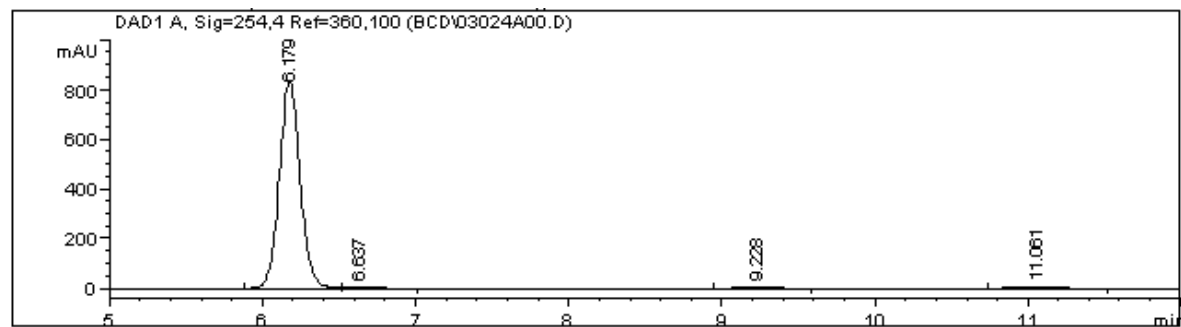

```

=====
                          Area Percent Report
=====
  
```

```

Sorted By      :      Signal
Multiplier     :      1.0000
Dilution       :      1.0000
Use Multiplier & Dilution Factor with ISTDs
  
```

Signal 1: DAD1 A, Sig=254,4 Ref=360,100

| Peak # | RetTime [min] | Type | Width [min] | Area [mAU*s] | Height [mAU] | Area %  |
|--------|---------------|------|-------------|--------------|--------------|---------|
| 1      | 6.179         | BV   | 0.1441      | 7777.88281   | 839.16412    | 97.5618 |
| 2      | 6.637         | VB   | 0.1600      | 57.06207     | 5.28388      | 0.7158  |
| 3      | 9.228         | BB   | 0.2055      | 53.79602     | 4.08839      | 0.6748  |
| 4      | 11.061        | VP   | 0.2529      | 83.52129     | 5.27057      | 1.0476  |

**Racemic 15**

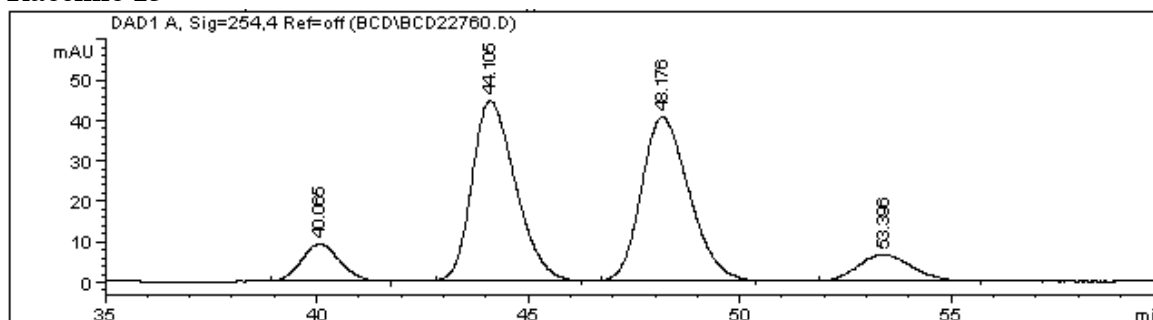

=====  
 Area Percent Report  
 =====

Sorted By : Signal  
 Multiplier : 1.0000  
 Dilution : 1.0000  
 Sample Amount : 1.00000 [ng/ul] (not used in calc.)  
 Use Multiplier & Dilution Factor with ISTDs

Signal 1: DAD1 A, Sig=254,4 Ref=off

| Peak # | RetTime [min] | Type | Width [min] | Area [mAU*s] | Height [mAU] | Area %  |
|--------|---------------|------|-------------|--------------|--------------|---------|
| 1      | 40.065        | BB   | 0.9416      | 595.40900    | 9.29191      | 7.8787  |
| 2      | 44.105        | BB   | 1.1073      | 3182.90112   | 44.56434     | 42.1173 |
| 3      | 48.176        | BB   | 1.2056      | 3184.50073   | 40.57549     | 42.1385 |
| 4      | 53.396        | BB   | 1.2253      | 594.41382    | 6.65961      | 7.8655  |

**Enantioenriched 15**

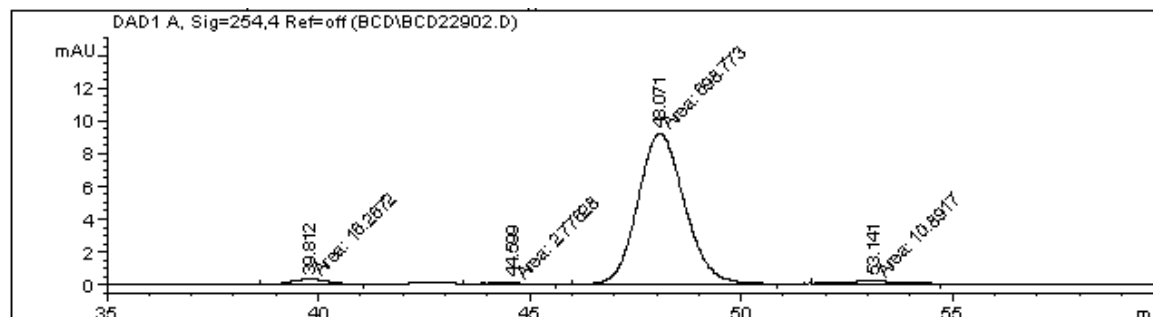

=====  
 Area Percent Report  
 =====

Sorted By : Signal  
 Multiplier : 1.0000  
 Dilution : 1.0000  
 Sample Amount : 1.00000 [ng/ul] (not used in calc.)  
 Use Multiplier & Dilution Factor with ISTDs

Signal 1: DAD1 A, Sig=254,4 Ref=off

| Peak # | RetTime [min] | Type | Width [min] | Area [mAU*s] | Height [mAU] | Area %  |
|--------|---------------|------|-------------|--------------|--------------|---------|
| 1      | 39.812        | MM   | 0.9926      | 16.26719     | 2.73140e-1   | 2.2323  |
| 2      | 44.599        | MM   | 0.9958      | 2.77628      | 4.64650e-2   | 0.3810  |
| 3      | 48.071        | MM   | 1.2708      | 698.77283    | 9.16423      | 95.8920 |
| 4      | 53.141        | MM   | 1.4442      | 10.89167     | 1.25692e-1   | 1.4947  |

**Racemic 16**

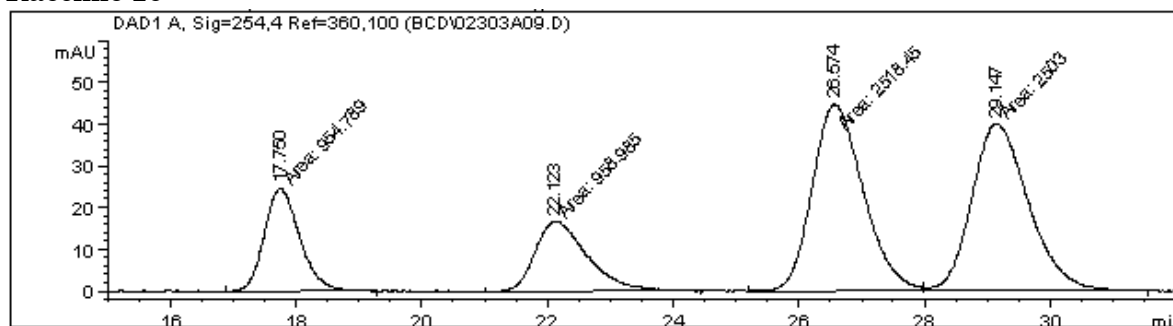

=====  
 Area Percent Report  
 =====

Sorted By : Signal  
 Multiplier : 1.0000  
 Dilution : 1.0000  
 Use Multiplier & Dilution Factor with ISTDs

Signal 1: DAD1 A, Sig=254,4 Ref=360,100

| Peak # | RetTime [min] | Type | Width [min] | Area [mAU*s] | Height [mAU] | Area %  |
|--------|---------------|------|-------------|--------------|--------------|---------|
| 1      | 17.750        | MM   | 0.6498      | 954.78943    | 24.48929     | 13.7672 |
| 2      | 22.123        | MM   | 0.9627      | 958.98456    | 16.60286     | 13.8277 |
| 3      | 26.574        | MM   | 0.9385      | 2518.45142   | 44.72545     | 36.3139 |
| 4      | 29.147        | MM   | 1.0430      | 2502.99756   | 39.99740     | 36.0911 |

**Enantioenriched 16**

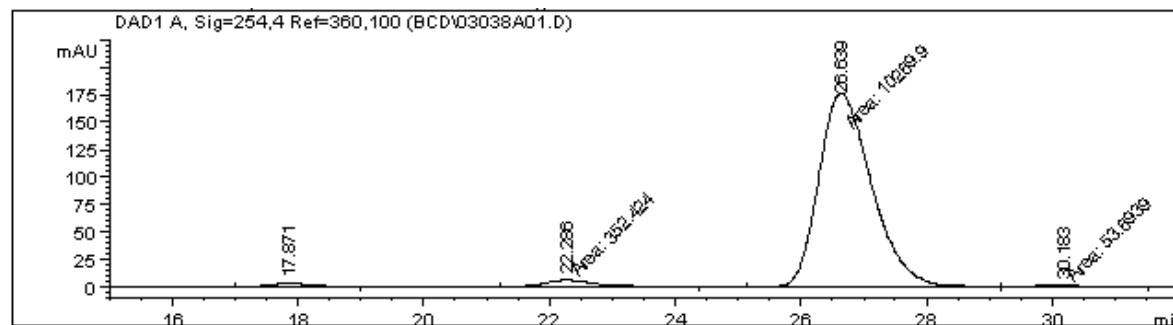

=====  
 Area Percent Report  
 =====

Sorted By : Signal  
 Multiplier : 1.0000  
 Dilution : 1.0000  
 Use Multiplier & Dilution Factor with ISTDs

Signal 1: DAD1 A, Sig=254,4 Ref=360,100

| Peak # | RetTime [min] | Type | Width [min] | Area [mAU*s] | Height [mAU] | Area %  |
|--------|---------------|------|-------------|--------------|--------------|---------|
| 1      | 17.871        | BB   | 0.5196      | 140.74530    | 3.54175      | 1.3012  |
| 2      | 22.286        | MM   | 0.9875      | 352.42435    | 5.94780      | 3.2581  |
| 3      | 26.639        | MM   | 0.9708      | 1.02699e4    | 176.30751    | 94.9443 |
| 4      | 30.183        | MM   | 1.0632      | 53.69390     | 8.41677e-1   | 0.4964  |

**Racemic 17**

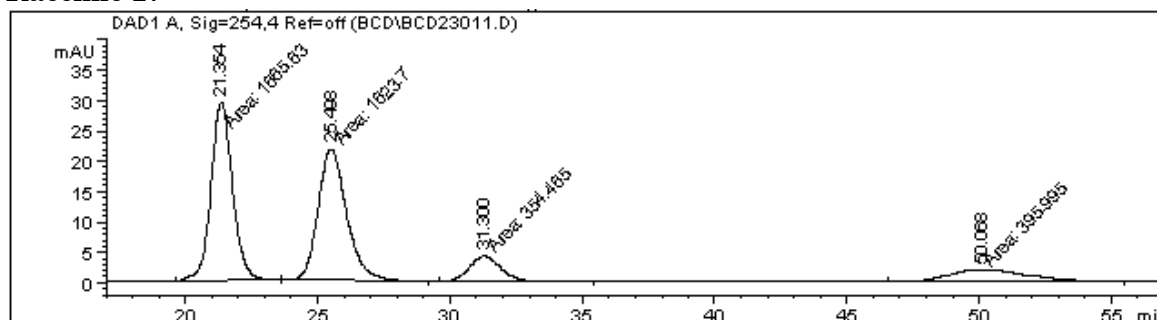

=====  
 Area Percent Report  
 =====

Sorted By : Signal  
 Multiplier : 1.0000  
 Dilution : 1.0000  
 Sample Amount : 1.00000 [ng/ul] (not used in calc.)  
 Use Multiplier & Dilution Factor with ISTDs

Signal 1: DAD1 A, Sig=254,4 Ref=off

| Peak # | RetTime [min] | Type | Width [min] | Area [mAU*s] | Height [mAU] | Area %  |
|--------|---------------|------|-------------|--------------|--------------|---------|
| 1      | 21.354        | MM   | 0.9470      | 1665.63306   | 29.31409     | 41.2306 |
| 2      | 25.498        | MM   | 1.2491      | 1623.70178   | 21.66413     | 40.1927 |
| 3      | 31.300        | MM   | 1.4120      | 354.46512    | 4.18406      | 8.7743  |
| 4      | 50.068        | MM   | 3.4012      | 395.99542    | 1.94045      | 9.8024  |

**Enantioenriched 17 crude**

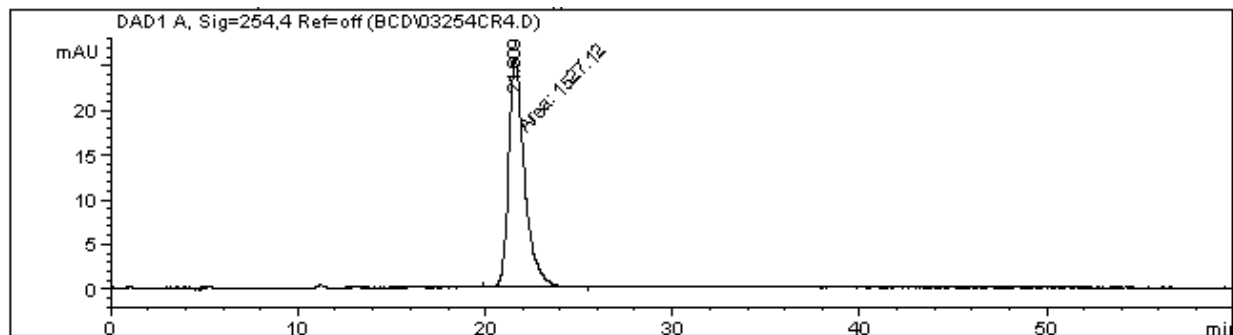

=====  
 Area Percent Report  
 =====

Sorted By : Signal  
 Multiplier : 1.0000  
 Dilution : 1.0000  
 Sample Amount : 1.00000 [ng/ul] (not used in calc.)  
 Use Multiplier & Dilution Factor with ISTDs

Signal 1: DAD1 A, Sig=254,4 Ref=off

| Peak # | RetTime [min] | Type | Width [min] | Area [mAU*s] | Height [mAU] | Area %   |
|--------|---------------|------|-------------|--------------|--------------|----------|
| 1      | 21.609        | MM   | 0.9933      | 1527.11536   | 25.62416     | 100.0000 |

**Enantioenriched 17 pure**

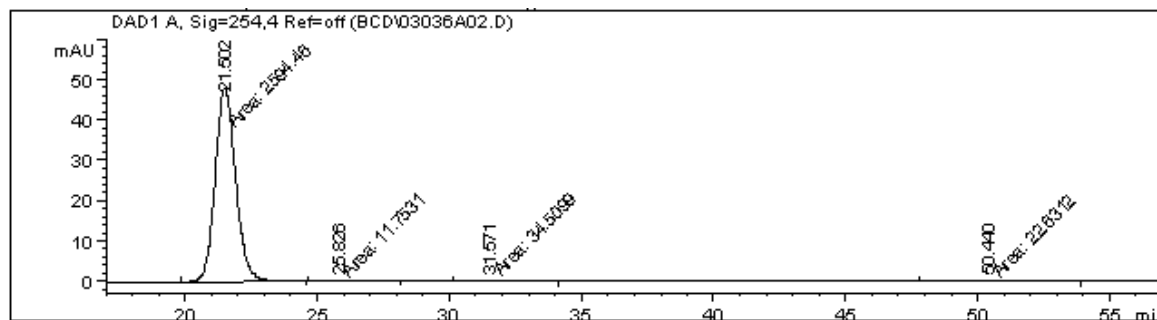

=====  
 Area Percent Report  
 =====

Sorted By : Signal  
 Multiplier : 1.0000  
 Dilution : 1.0000  
 Sample Amount : 1.00000 [ng/ul] (not used in calc.)  
 Use Multiplier & Dilution Factor with ISTDs

Signal 1: DAD1 A, Sig=254,4 Ref=off

| Peak # | RetTime [min] | Type | Width [min] | Area [mAU*s] | Height [mAU] | Area %  |
|--------|---------------|------|-------------|--------------|--------------|---------|
| 1      | 21.502        | MM   | 0.8997      | 2594.46362   | 48.06348     | 97.4133 |
| 2      | 25.826        | MM   | 1.2543      | 11.75313     | 1.56174e-1   | 0.4413  |
| 3      | 31.571        | MM   | 1.3163      | 34.50987     | 4.36968e-1   | 1.2957  |
| 4      | 50.440        | MM   | 2.4514      | 22.63119     | 1.53863e-1   | 0.8497  |



**Racemic 18**

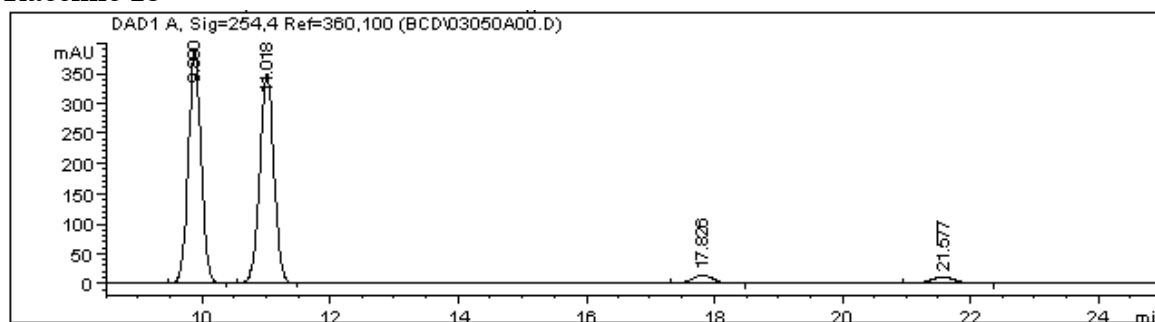

=====  
 Area Percent Report  
 =====

Sorted By : Signal  
 Multiplier : 1.0000  
 Dilution : 1.0000  
 Use Multiplier & Dilution Factor with ISTDs

Signal 1: DAD1 A, Sig=254,4 Ref=360,100

| Peak # | RetTime [min] | Type | Width [min] | Area [mAU*s] | Height [mAU] | Area %  |
|--------|---------------|------|-------------|--------------|--------------|---------|
| 1      | 9.890         | BB   | 0.2156      | 5391.89014   | 384.44666    | 47.1675 |
| 2      | 11.018        | BB   | 0.2402      | 5387.81689   | 348.84540    | 47.1318 |
| 3      | 17.826        | BE   | 0.3742      | 324.46991    | 12.95661     | 2.8384  |
| 4      | 21.577        | BP   | 0.3753      | 327.19901    | 10.62311     | 2.8623  |

**Enantioenriched 18**

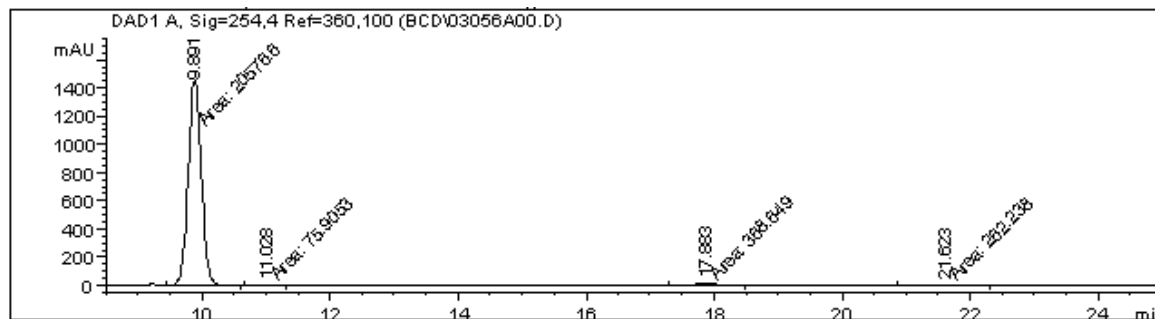

=====  
 Area Percent Report  
 =====

Sorted By : Signal  
 Multiplier : 1.0000  
 Dilution : 1.0000  
 Use Multiplier & Dilution Factor with ISTDs

Signal 1: DAD1 A, Sig=254,4 Ref=360,100

| Peak # | RetTime [min] | Type | Width [min] | Area [mAU*s] | Height [mAU] | Area %  |
|--------|---------------|------|-------------|--------------|--------------|---------|
| 1      | 9.891         | MM   | 0.2365      | 2.05766e4    | 1450.02209   | 96.6791 |
| 2      | 11.028        | MM   | 0.2471      | 75.90530     | 5.11897      | 0.3566  |
| 3      | 17.883        | MM   | 0.4295      | 368.64908    | 14.30435     | 1.7321  |
| 4      | 21.623        | MM   | 0.5330      | 262.23761    | 8.20065      | 1.2321  |

**Racemic 19**

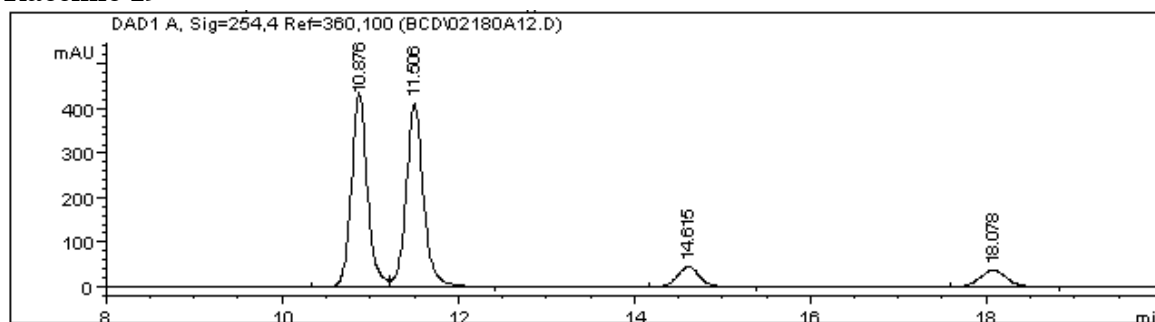

=====  
 Area Percent Report  
 =====

Sorted By : Signal  
 Multiplier : 1.0000  
 Dilution : 1.0000  
 Use Multiplier & Dilution Factor with ISTDs

Signal 1: DAD1 A, Sig=254,4 Ref=360,100

| Peak # | RetTime [min] | Type | Width [min] | Area [mAU*s] | Height [mAU] | Area %  |
|--------|---------------|------|-------------|--------------|--------------|---------|
| 1      | 10.876        | PV   | 0.1912      | 5468.41260   | 433.31494    | 43.2197 |
| 2      | 11.506        | VB   | 0.2080      | 5617.56396   | 409.65561    | 44.3986 |
| 3      | 14.615        | BP   | 0.2669      | 784.41248    | 45.09694     | 6.1996  |
| 4      | 18.078        | BB   | 0.3302      | 782.19501    | 36.47874     | 6.1821  |

**Enantioenriched 19**

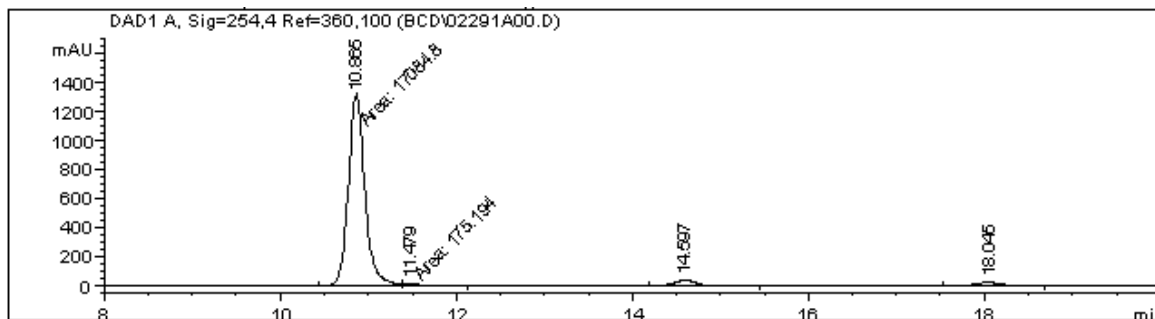

=====  
 Area Percent Report  
 =====

Sorted By : Signal  
 Multiplier : 1.0000  
 Dilution : 1.0000  
 Use Multiplier & Dilution Factor with ISTDs

Signal 1: DAD1 A, Sig=254,4 Ref=360,100

| Peak # | RetTime [min] | Type | Width [min] | Area [mAU*s] | Height [mAU] | Area %  |
|--------|---------------|------|-------------|--------------|--------------|---------|
| 1      | 10.865        | MM   | 0.2159      | 1.70848e4    | 1318.71960   | 93.3419 |
| 2      | 11.479        | MM   | 0.2324      | 175.19363    | 12.56404     | 0.9572  |
| 3      | 14.597        | BB   | 0.2669      | 598.36121    | 34.40852     | 3.2691  |
| 4      | 18.045        | BB   | 0.3242      | 445.11942    | 20.91951     | 2.4319  |

**Racemic 20**

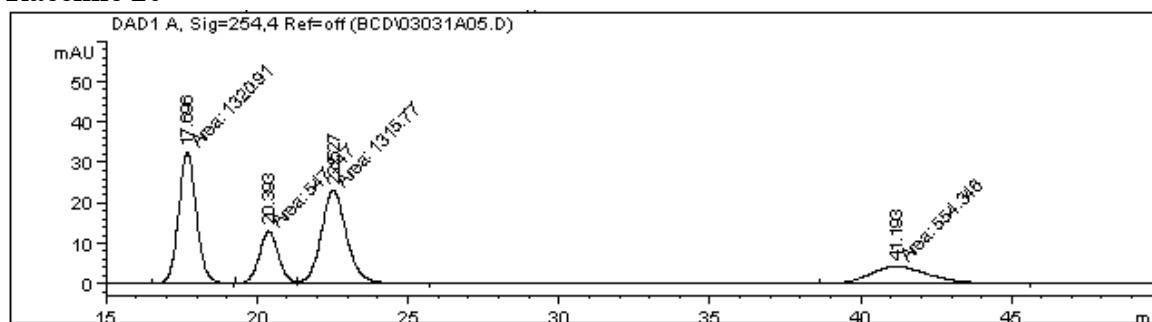

=====  
 Area Percent Report  
 =====

Sorted By : Signal  
 Multiplier : 1.0000  
 Dilution : 1.0000  
 Sample Amount : 1.00000 [ng/ul] (not used in calc.)  
 Use Multiplier & Dilution Factor with ISTDs

Signal 1: DAD1 A, Sig=254,4 Ref=off

| Peak # | RetTime [min] | Type | Width [min] | Area [mAU*s] | Height [mAU] | Area %  |
|--------|---------------|------|-------------|--------------|--------------|---------|
| 1      | 17.696        | MM   | 0.6788      | 1320.90674   | 32.43325     | 35.3290 |
| 2      | 20.393        | MM   | 0.7237      | 547.84705    | 12.61658     | 14.6527 |
| 3      | 22.527        | MM   | 0.9605      | 1315.77478   | 22.83084     | 35.1917 |
| 4      | 41.193        | MM   | 2.2163      | 554.34589    | 4.16870      | 14.8265 |

**Enantioenriched 20**

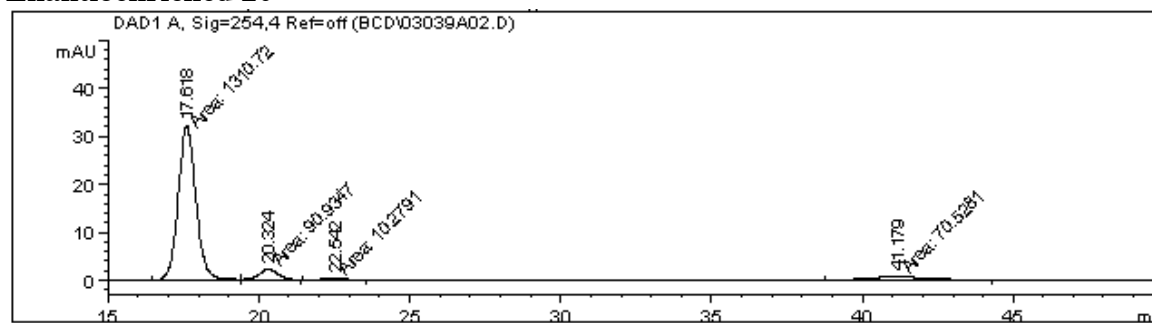

=====  
 Area Percent Report  
 =====

Sorted By : Signal  
 Multiplier : 1.0000  
 Dilution : 1.0000  
 Sample Amount : 1.00000 [ng/ul] (not used in calc.)  
 Use Multiplier & Dilution Factor with ISTDs

Signal 1: DAD1 A, Sig=254,4 Ref=off

| Peak # | RetTime [min] | Type | Width [min] | Area [mAU*s] | Height [mAU] | Area %  |
|--------|---------------|------|-------------|--------------|--------------|---------|
| 1      | 17.618        | MM   | 0.6838      | 1310.72046   | 31.94481     | 88.4151 |
| 2      | 20.324        | MM   | 0.7299      | 90.93474     | 2.07635      | 6.1340  |
| 3      | 22.542        | MM   | 0.8392      | 10.27911     | 2.04141e-1   | 0.6934  |
| 4      | 41.179        | MM   | 2.1621      | 70.52805     | 5.43677e-1   | 4.7575  |

**Racemic 21 (trans major)**

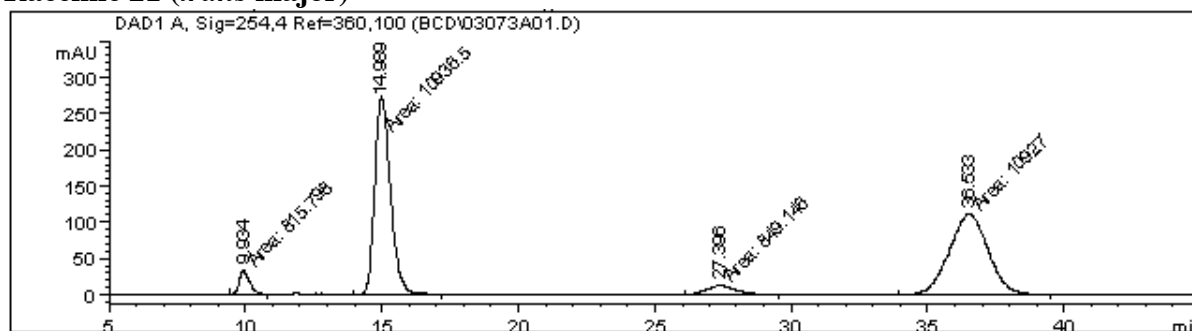

=====  
 Area Percent Report  
 =====

Sorted By : Signal  
 Multiplier : 1.0000  
 Dilution : 1.0000  
 Use Multiplier & Dilution Factor with ISTDs

Signal 1: DAD1 A, Sig=254,4 Ref=360,100

| Peak # | RetTime [min] | Type | Width [min] | Area [mAU*s] | Height [mAU] | Area %  |
|--------|---------------|------|-------------|--------------|--------------|---------|
| 1      | 9.934         | MM   | 0.4252      | 815.79834    | 31.97888     | 3.4673  |
| 2      | 14.989        | MM   | 0.6657      | 1.09365e4    | 273.79510    | 46.4820 |
| 3      | 27.396        | MM   | 1.2276      | 849.14551    | 11.52875     | 3.6090  |
| 4      | 36.533        | MM   | 1.6448      | 1.09270e4    | 110.71983    | 46.4417 |

**Enantioenriched 21**

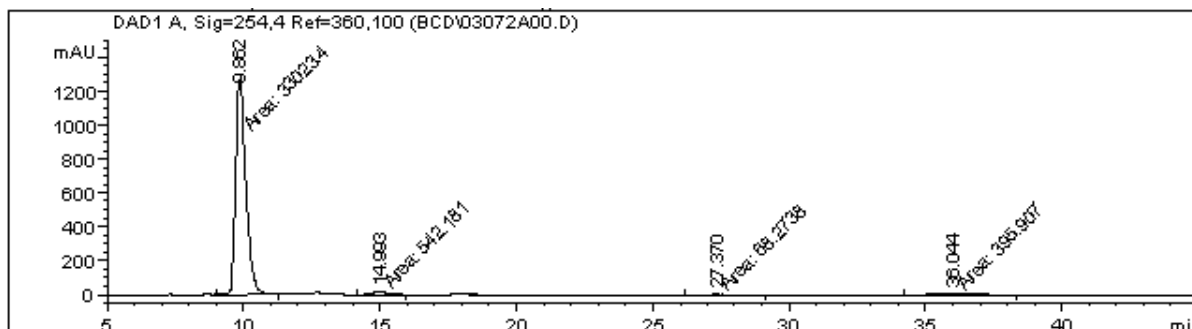

=====  
 Area Percent Report  
 =====

Sorted By : Signal  
 Multiplier : 1.0000  
 Dilution : 1.0000  
 Use Multiplier & Dilution Factor with ISTDs

Signal 1: DAD1 A, Sig=254,4 Ref=360,100

| Peak # | RetTime [min] | Type | Width [min] | Area [mAU*s] | Height [mAU] | Area %  |
|--------|---------------|------|-------------|--------------|--------------|---------|
| 1      | 9.862         | MM   | 0.4358      | 3.30234e4    | 1262.89734   | 97.0427 |
| 2      | 14.993        | MM   | 0.6395      | 542.18066    | 14.13126     | 1.5933  |
| 3      | 27.370        | MM   | 1.2340      | 68.27380     | 9.22149e-1   | 0.2006  |
| 4      | 36.044        | MM   | 1.5938      | 395.90704    | 4.14001      | 1.1634  |

**Racemic 22**

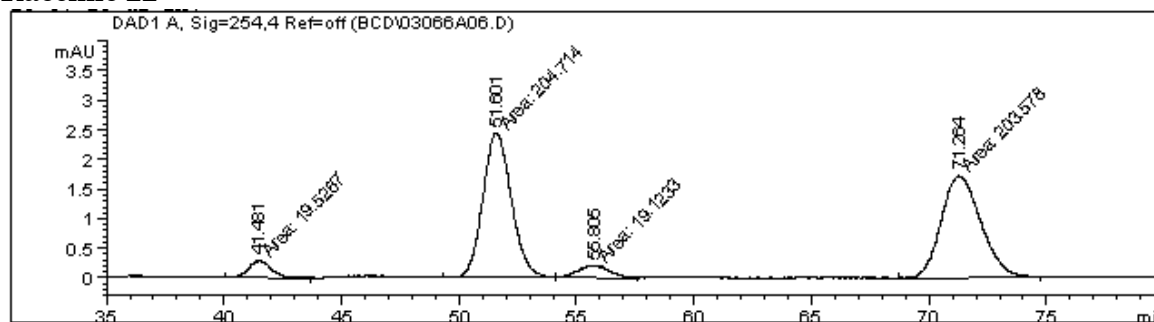

=====  
 Area Percent Report  
 =====

Sorted By : Signal  
 Multiplier : 1.0000  
 Dilution : 1.0000  
 Sample Amount : 1.00000 [ng/ul] (not used in calc.)  
 Use Multiplier & Dilution Factor with ISTDs

Signal 1: DAD1 A, Sig=254,4 Ref=off

| Peak # | RetTime [min] | Type | Width [min] | Area [mAU*s] | Height [mAU] | Area %  |
|--------|---------------|------|-------------|--------------|--------------|---------|
| 1      | 41.481        | MM   | 1.1425      | 19.52666     | 2.84864e-1   | 4.3689  |
| 2      | 51.601        | MM   | 1.4019      | 204.71352    | 2.43373      | 45.8032 |
| 3      | 55.805        | MM   | 1.5821      | 19.12330     | 2.01449e-1   | 4.2787  |
| 4      | 71.264        | MM   | 1.9630      | 203.57835    | 1.72848      | 45.5492 |

**Enantioenriched 22**

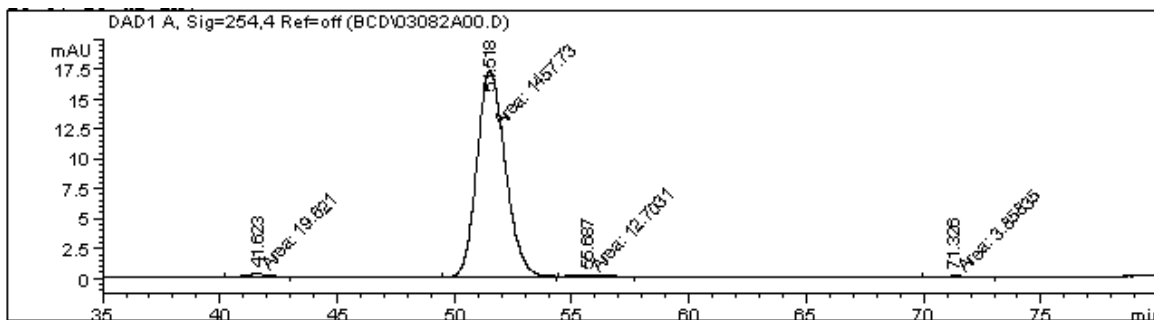

=====  
 Area Percent Report  
 =====

Sorted By : Signal  
 Multiplier : 1.0000  
 Dilution : 1.0000  
 Sample Amount : 1.00000 [ng/ul] (not used in calc.)  
 Use Multiplier & Dilution Factor with ISTDs

Signal 1: DAD1 A, Sig=254,4 Ref=off

| Peak # | RetTime [min] | Type | Width [min] | Area [mAU*s] | Height [mAU] | Area %  |
|--------|---------------|------|-------------|--------------|--------------|---------|
| 1      | 41.623        | MM   | 1.1009      | 19.62102     | 2.97037e-1   | 1.3134  |
| 2      | 51.518        | MM   | 1.4042      | 1457.72729   | 17.30186     | 97.5780 |
| 3      | 55.687        | MM   | 1.3777      | 12.70307     | 1.53670e-1   | 0.8503  |
| 4      | 71.326        | MM   | 1.3887      | 3.85835      | 4.63062e-2   | 0.2583  |

**Racemic 23**

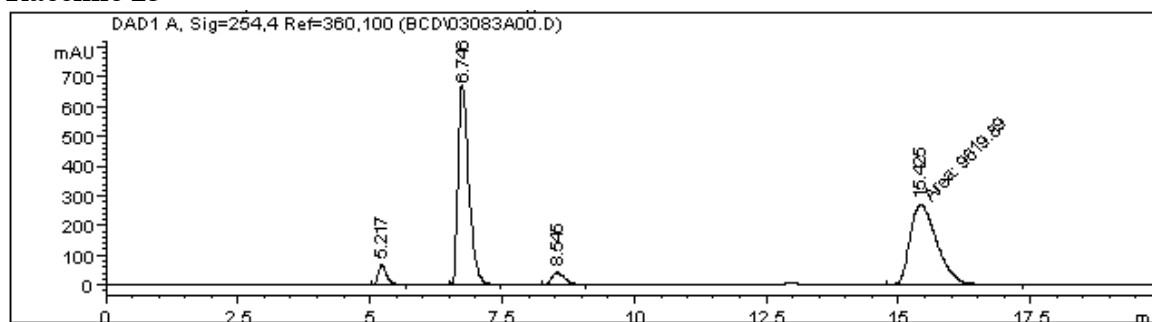

=====  
 Area Percent Report  
 =====

Sorted By : Signal  
 Multiplier : 1.0000  
 Dilution : 1.0000  
 Use Multiplier & Dilution Factor with ISTDs

Signal 1: DAD1 A, Sig=254,4 Ref=360,100

| Peak # | RetTime [min] | Type | Width [min] | Area [mAU*s] | Height [mAU] | Area %  |
|--------|---------------|------|-------------|--------------|--------------|---------|
| 1      | 5.217         | PB   | 0.1553      | 733.53015    | 70.52425     | 3.5743  |
| 2      | 6.746         | BB   | 0.2135      | 9440.03418   | 673.72266    | 45.9992 |
| 3      | 8.545         | BB   | 0.2672      | 728.70337    | 41.43128     | 3.5508  |
| 4      | 15.425        | MM   | 0.5935      | 9619.88672   | 270.13370    | 46.8756 |

**Enantioenriched 23**

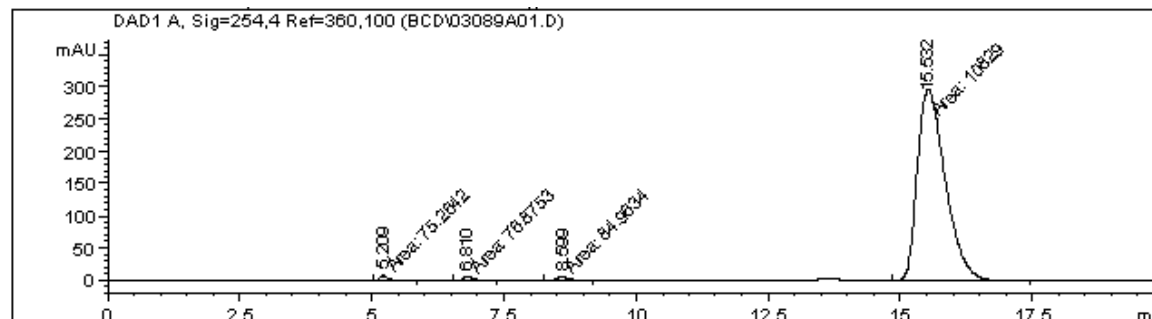

=====  
 Area Percent Report  
 =====

Sorted By : Signal  
 Multiplier : 1.0000  
 Dilution : 1.0000  
 Use Multiplier & Dilution Factor with ISTDs

Signal 1: DAD1 A, Sig=254,4 Ref=360,100

| Peak # | RetTime [min] | Type | Width [min] | Area [mAU*s] | Height [mAU] | Area %  |
|--------|---------------|------|-------------|--------------|--------------|---------|
| 1      | 5.209         | MM   | 0.1868      | 75.26424     | 6.71515      | 0.6801  |
| 2      | 6.810         | MM   | 0.2425      | 76.87533     | 5.28328      | 0.6947  |
| 3      | 8.599         | MM   | 0.3028      | 84.96345     | 4.67696      | 0.7678  |
| 4      | 15.532        | MM   | 0.6125      | 1.08290e4    | 294.68802    | 97.8574 |

**Racemic 24**

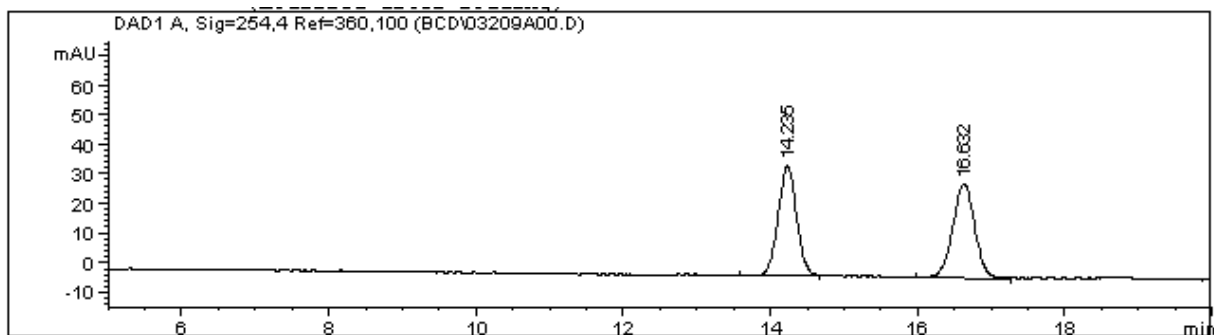

=====  
 Area Percent Report  
 =====

Sorted By : Signal  
 Multiplier : 1.0000  
 Dilution : 1.0000  
 Use Multiplier & Dilution Factor with ISTDs

Signal 1: DAD1 A, Sig=254,4 Ref=360,100

| Peak # | RetTime [min] | Type | Width [min] | Area [mAU*s] | Height [mAU] | Area %  |
|--------|---------------|------|-------------|--------------|--------------|---------|
| 1      | 14.235        | PV   | 0.2713      | 656.69836    | 37.31744     | 49.8073 |
| 2      | 16.632        | VB   | 0.3228      | 661.77905    | 31.79712     | 50.1927 |

**Enantioenriched 24**

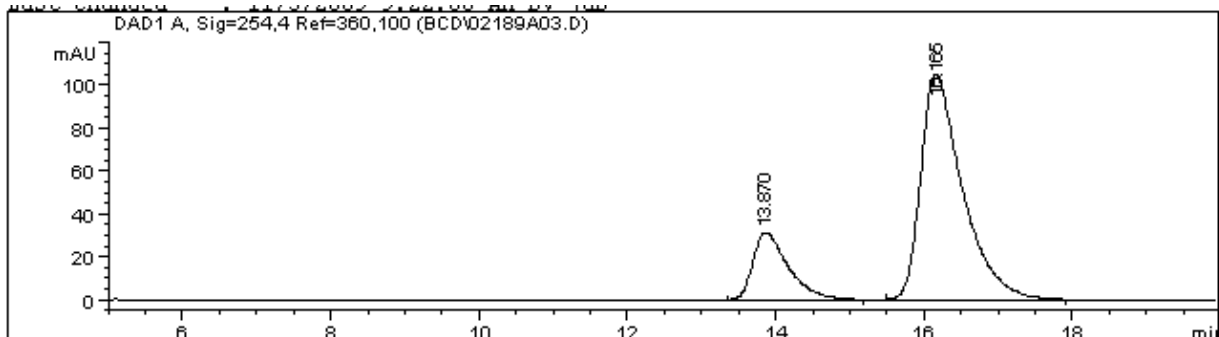

=====  
 Area Percent Report  
 =====

Sorted By : Signal  
 Multiplier : 1.0000  
 Dilution : 1.0000  
 Use Multiplier & Dilution Factor with ISTDs

Signal 1: DAD1 A, Sig=254,4 Ref=360,100

| Peak # | RetTime [min] | Type | Width [min] | Area [mAU*s] | Height [mAU] | Area %  |
|--------|---------------|------|-------------|--------------|--------------|---------|
| 1      | 13.870        | BB   | 0.4951      | 1047.98071   | 31.41843     | 20.2919 |
| 2      | 16.165        | BB   | 0.5785      | 4116.55566   | 105.19623    | 79.7081 |

### Selected NMR Spectra

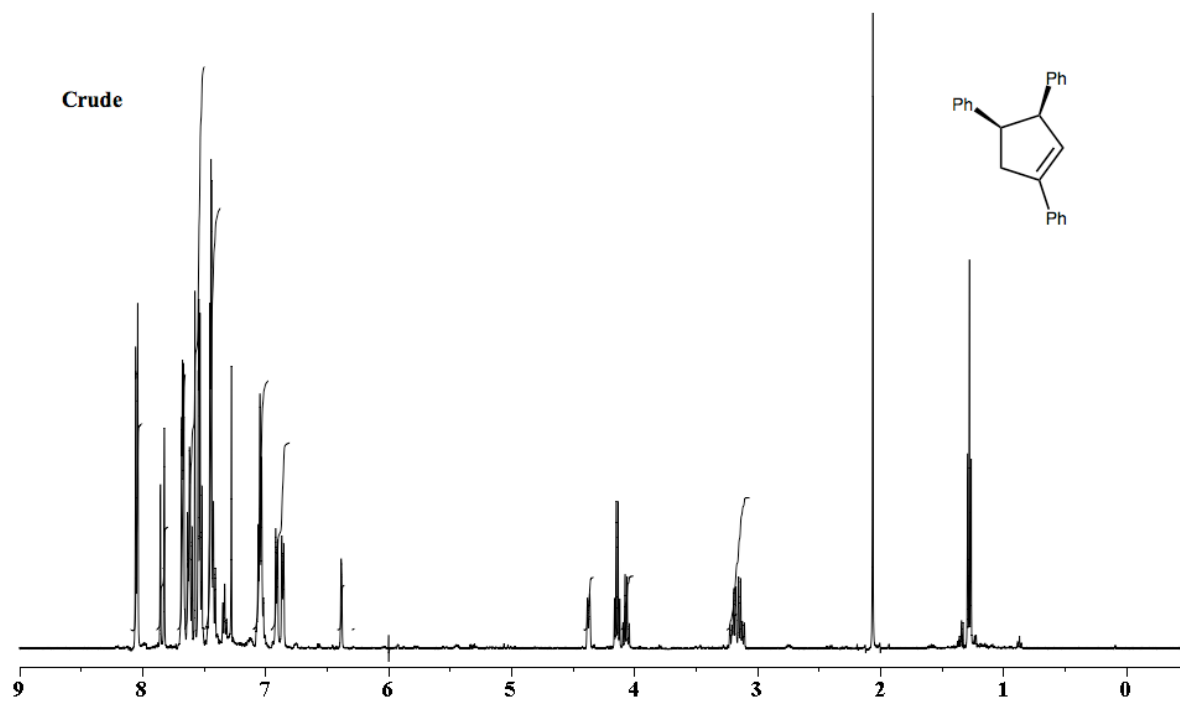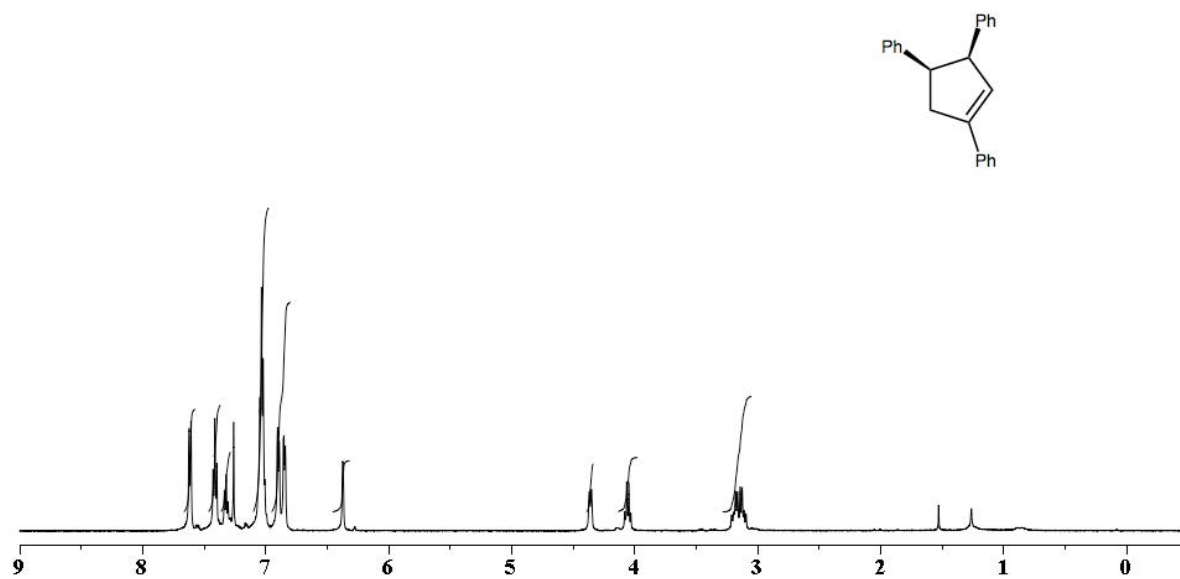



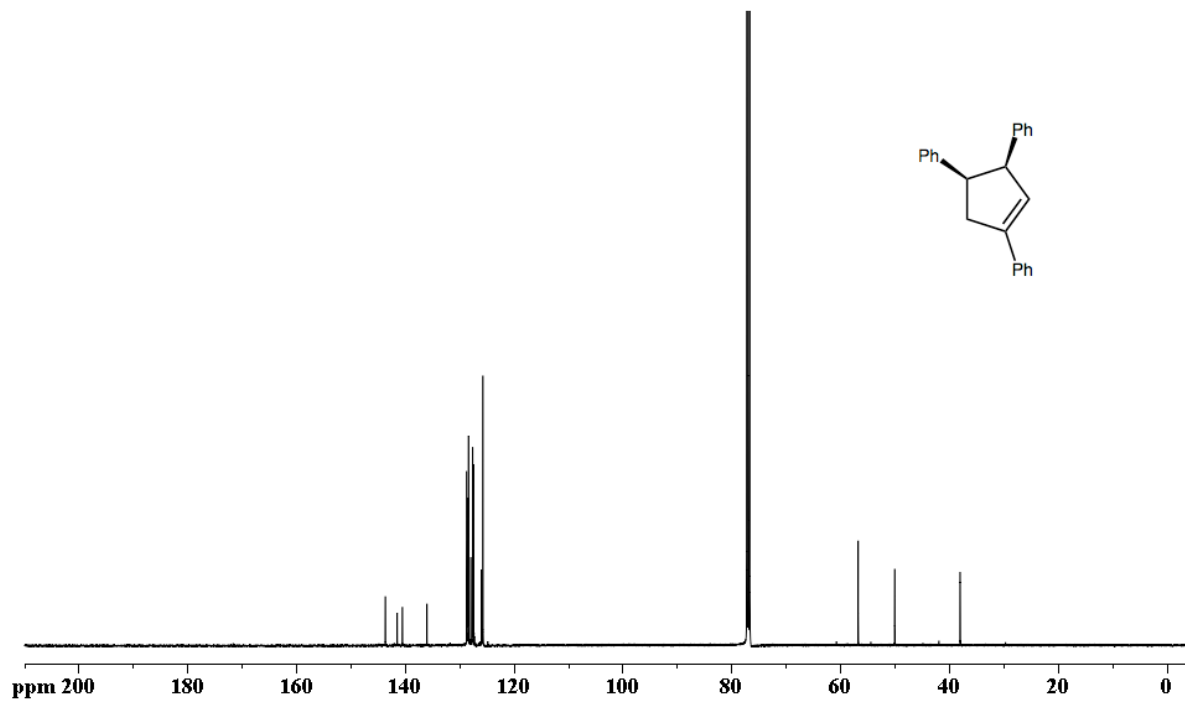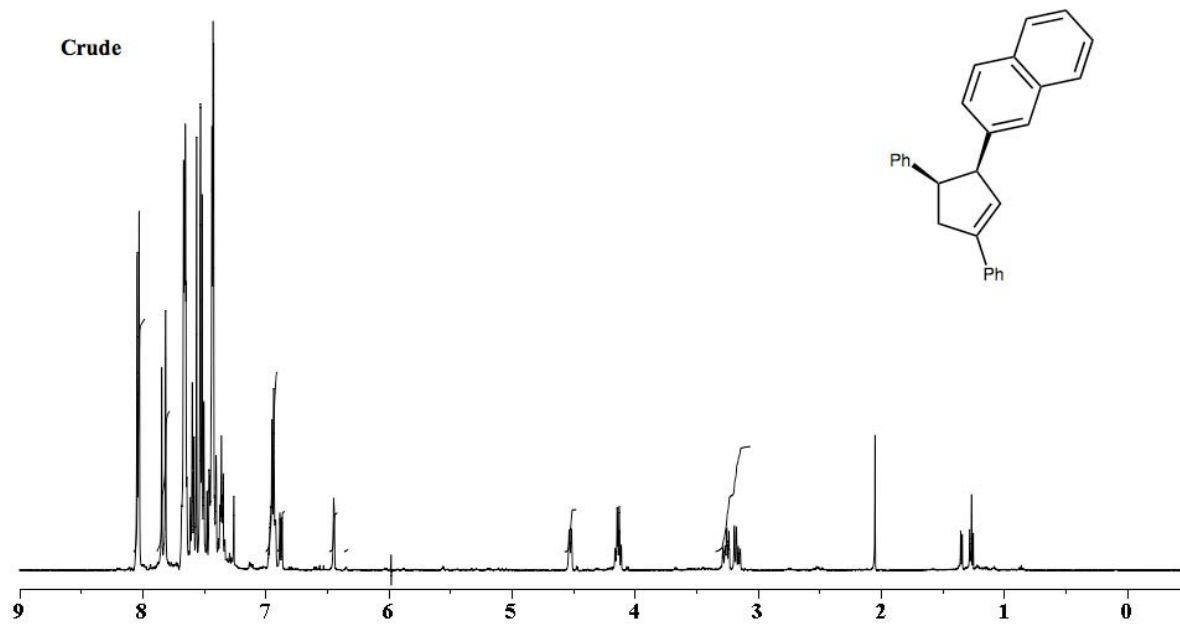

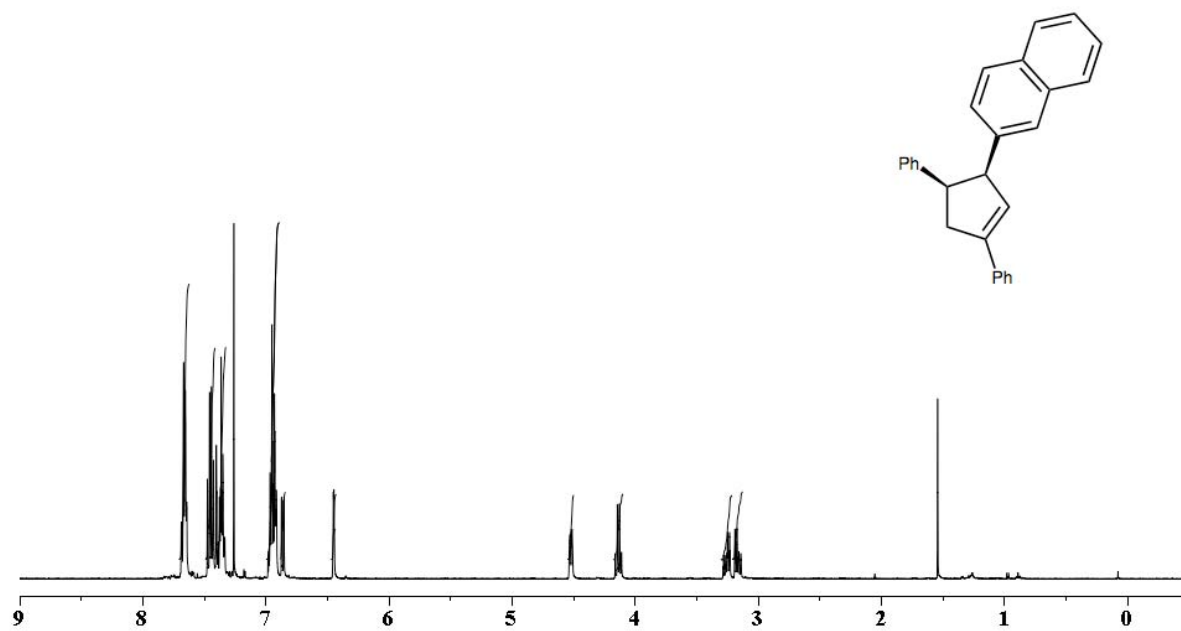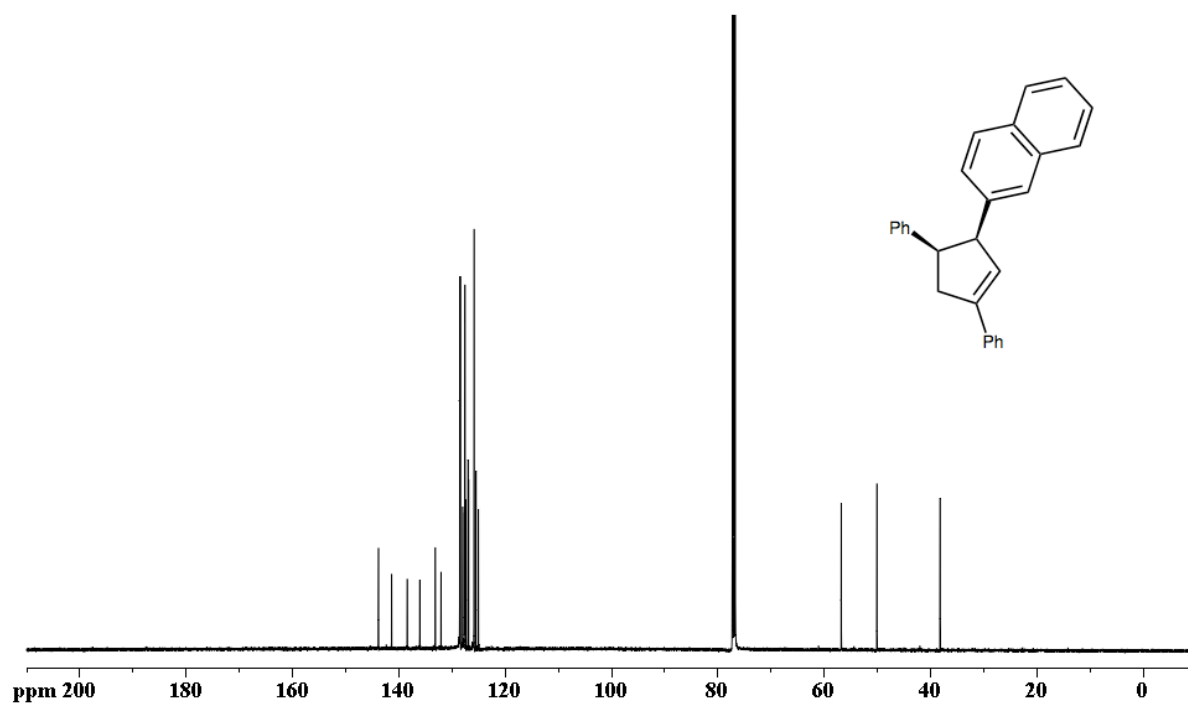

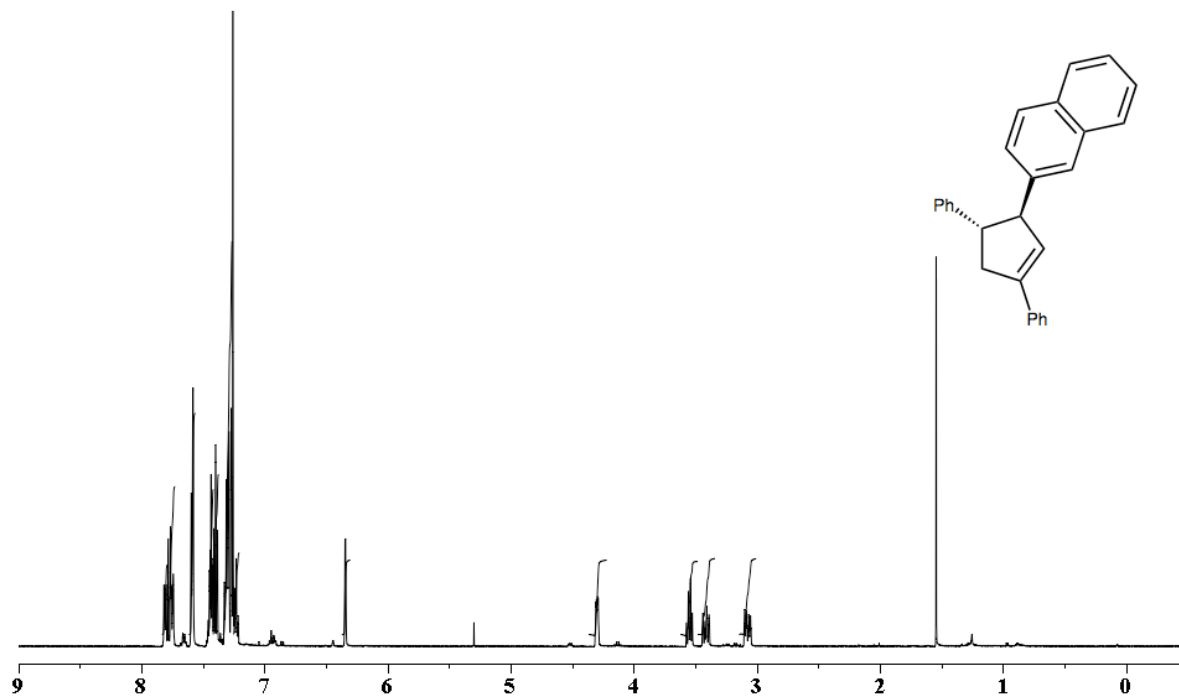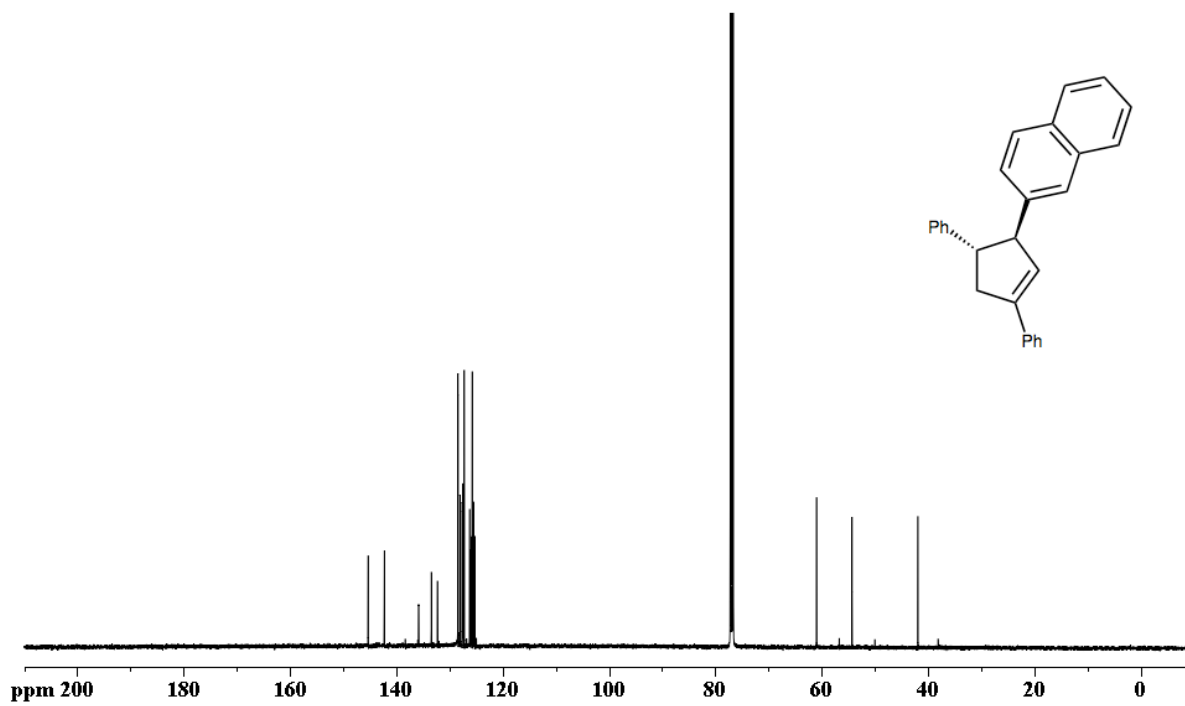

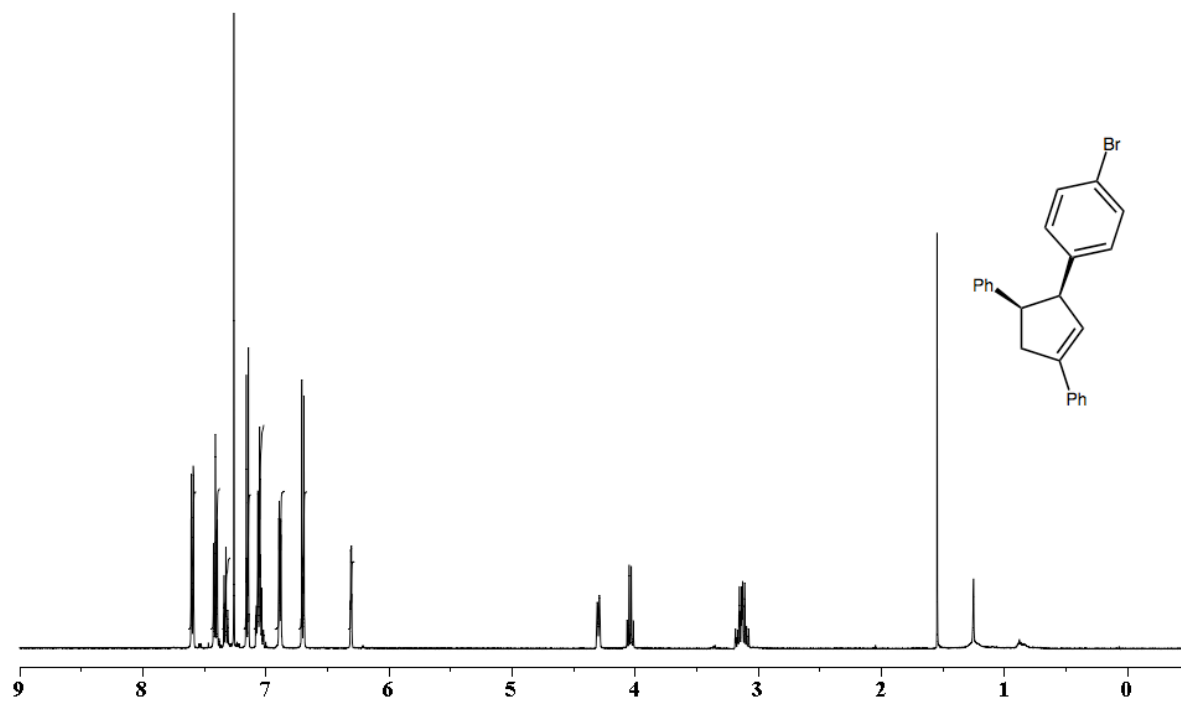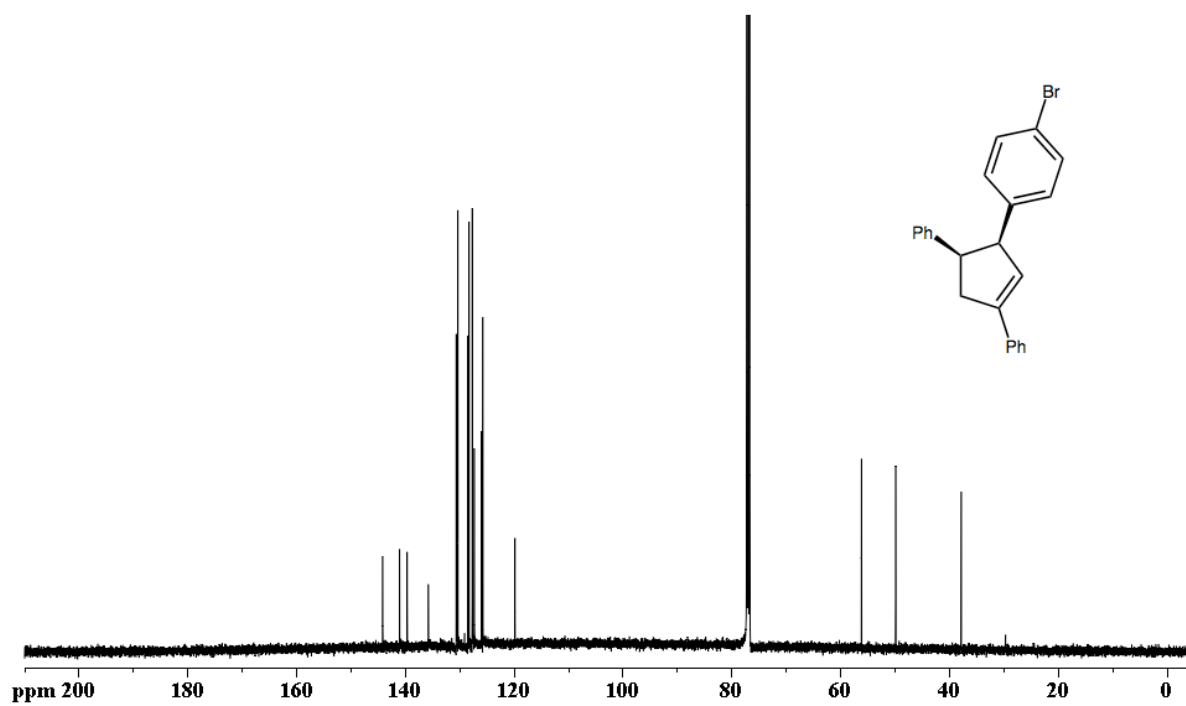

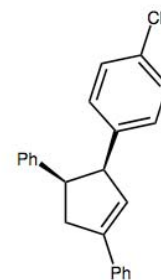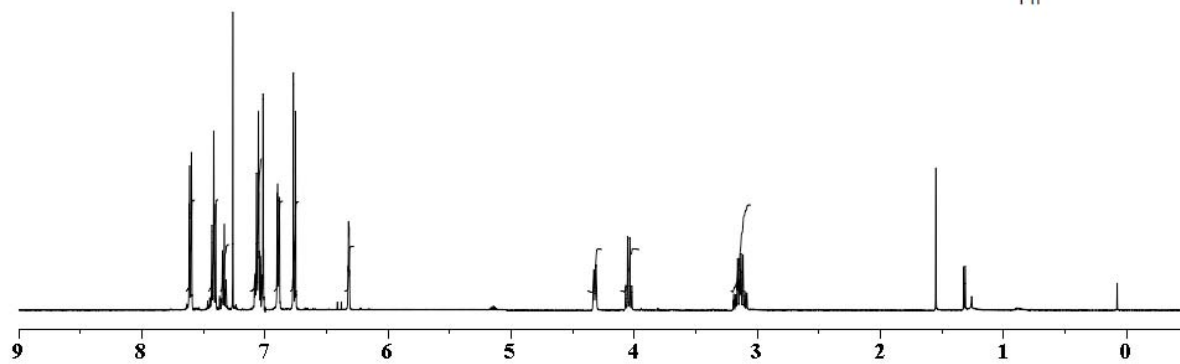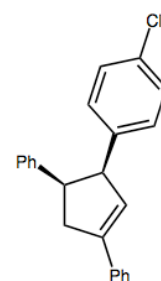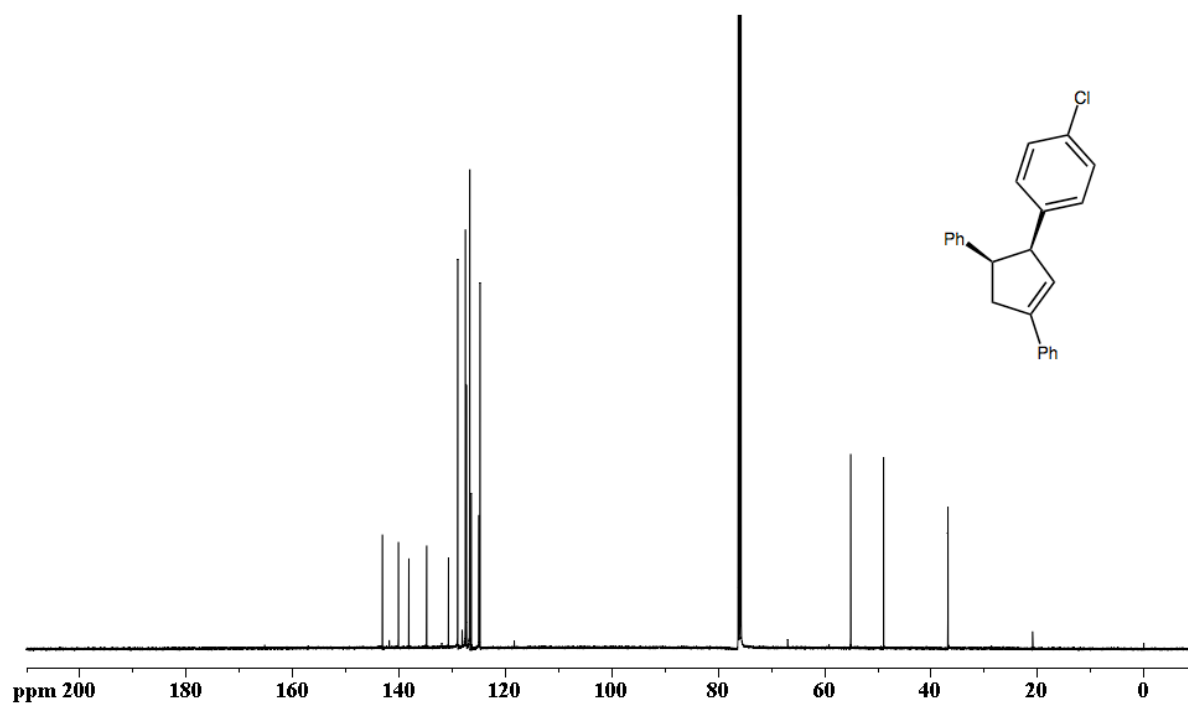

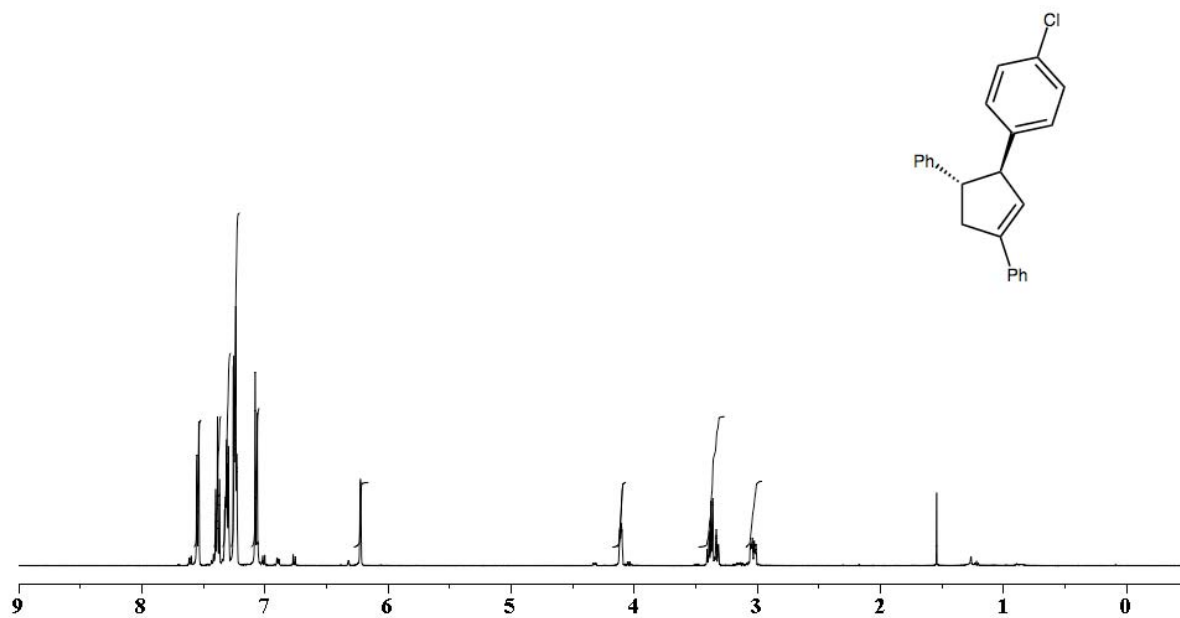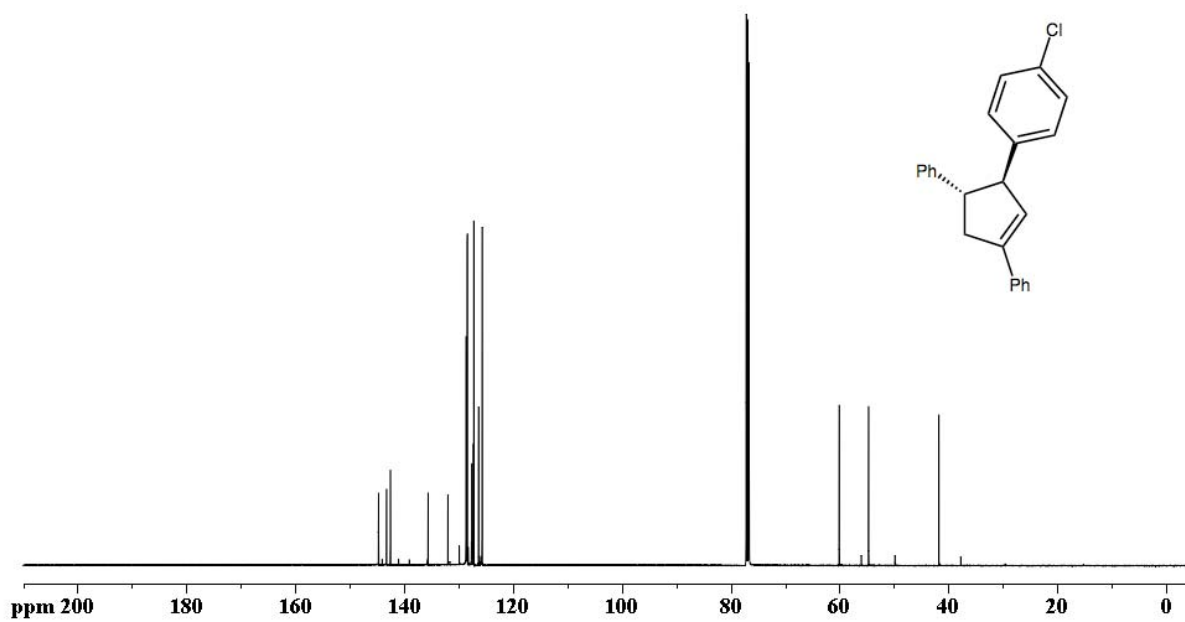

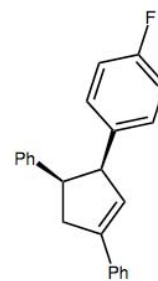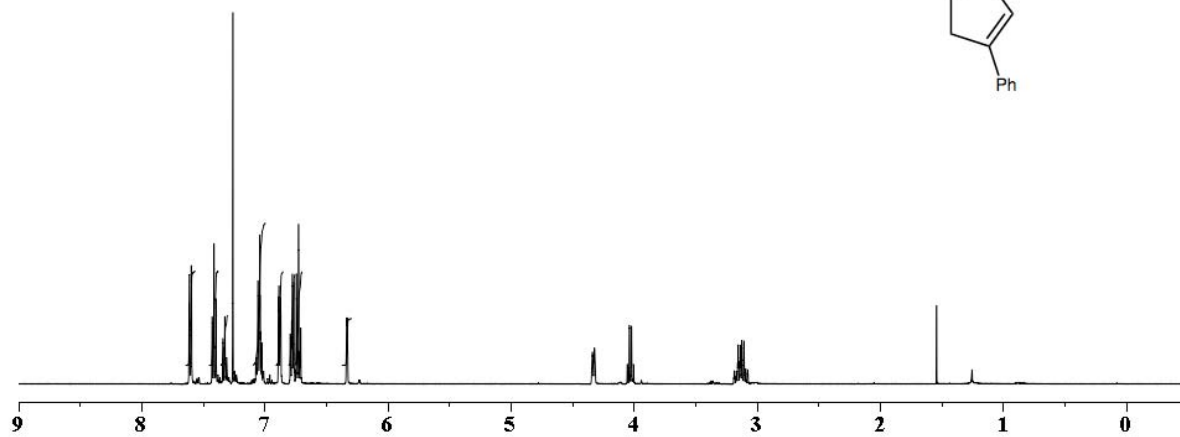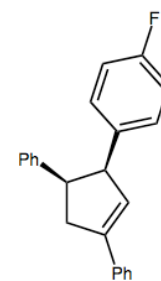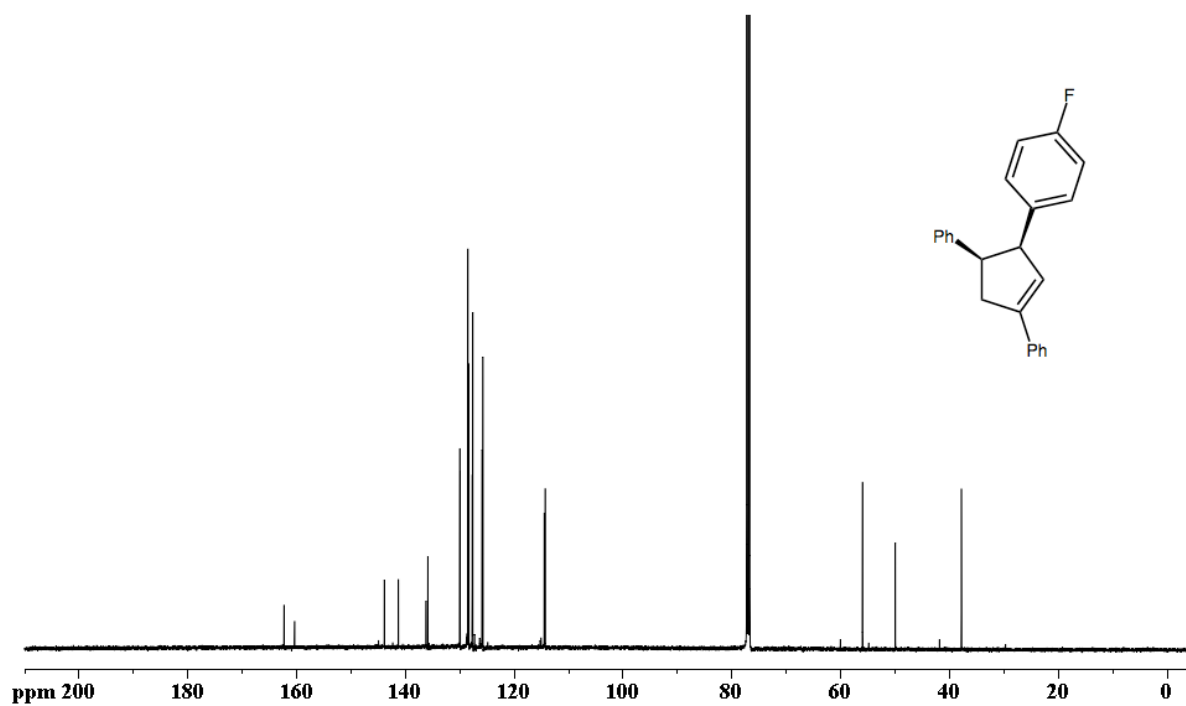

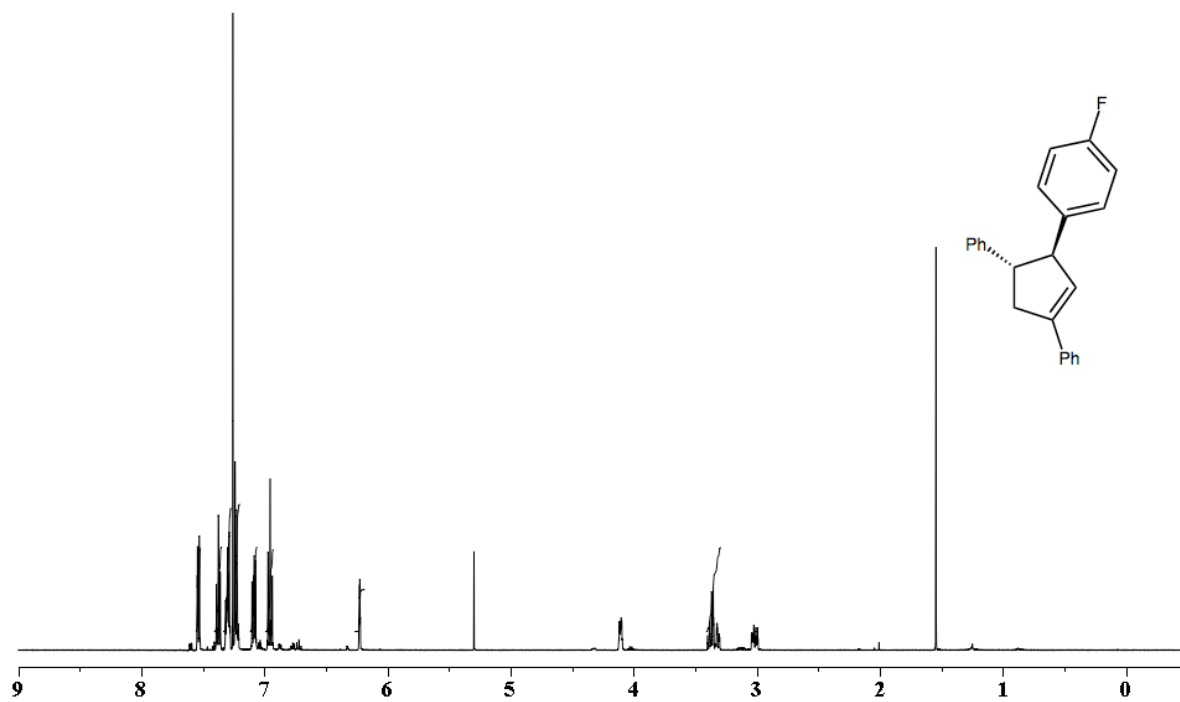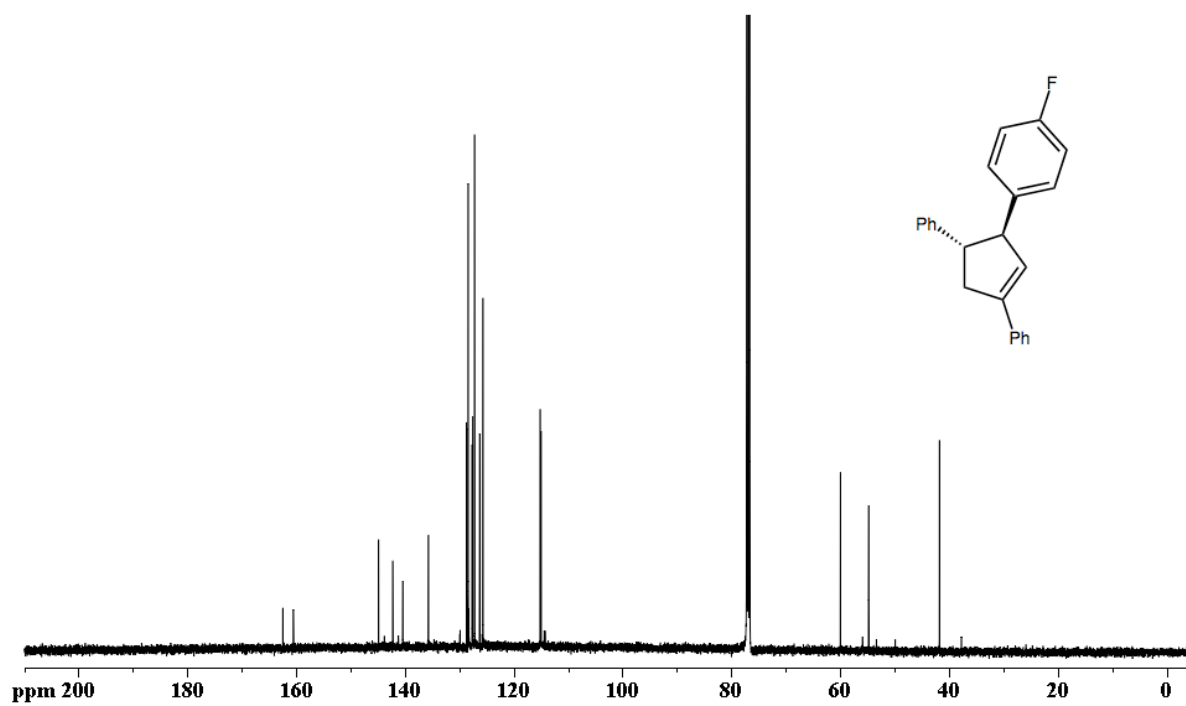



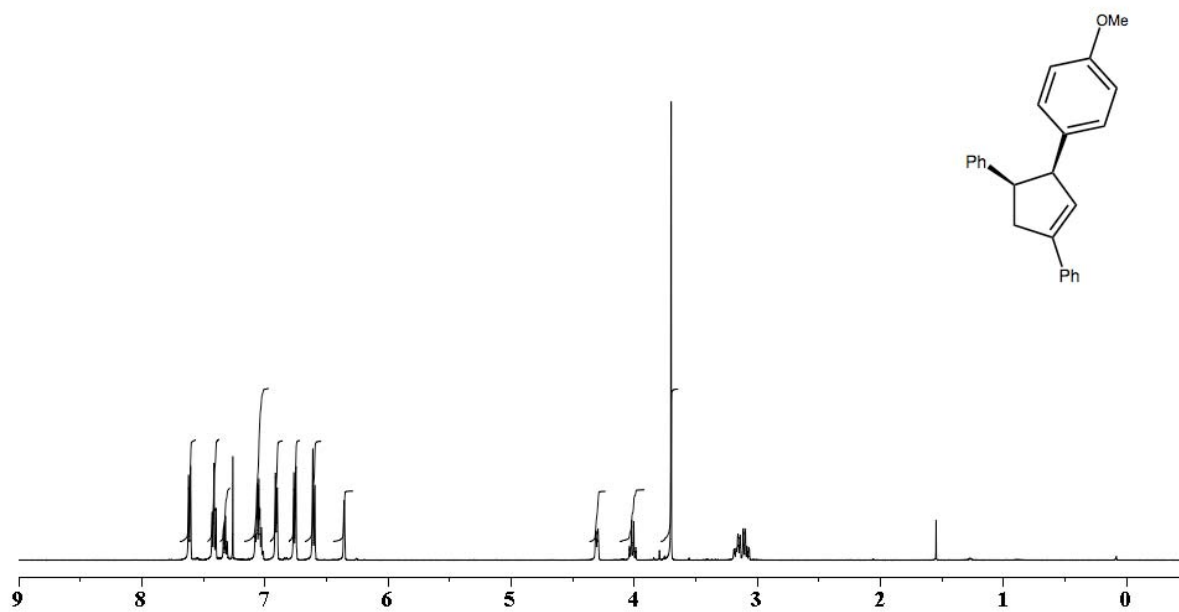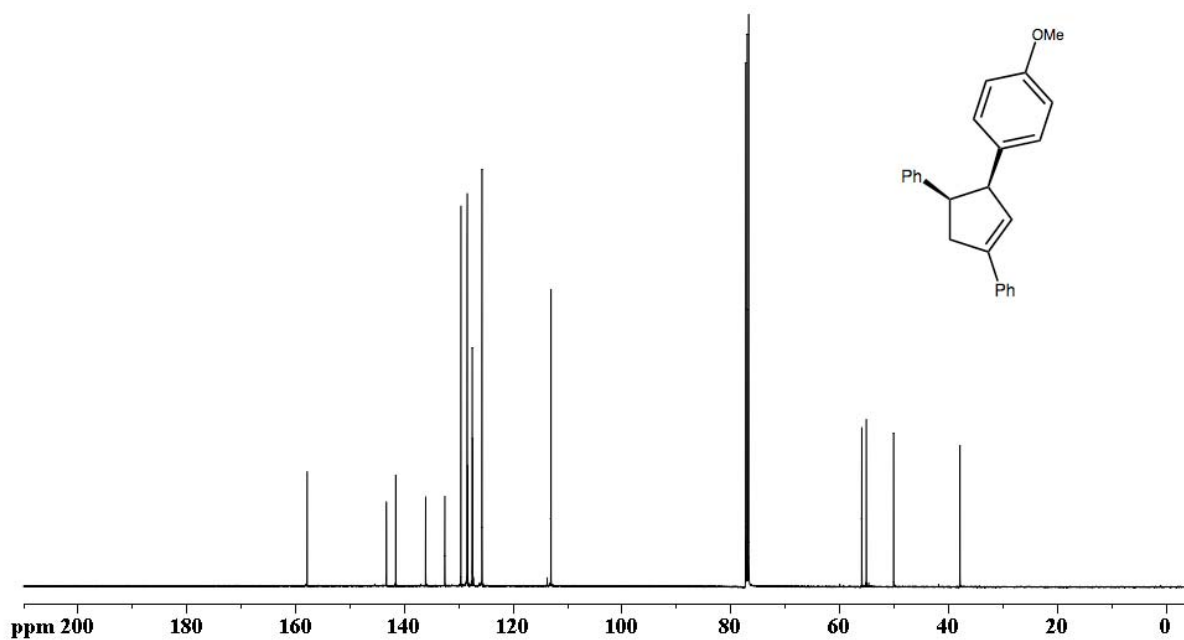

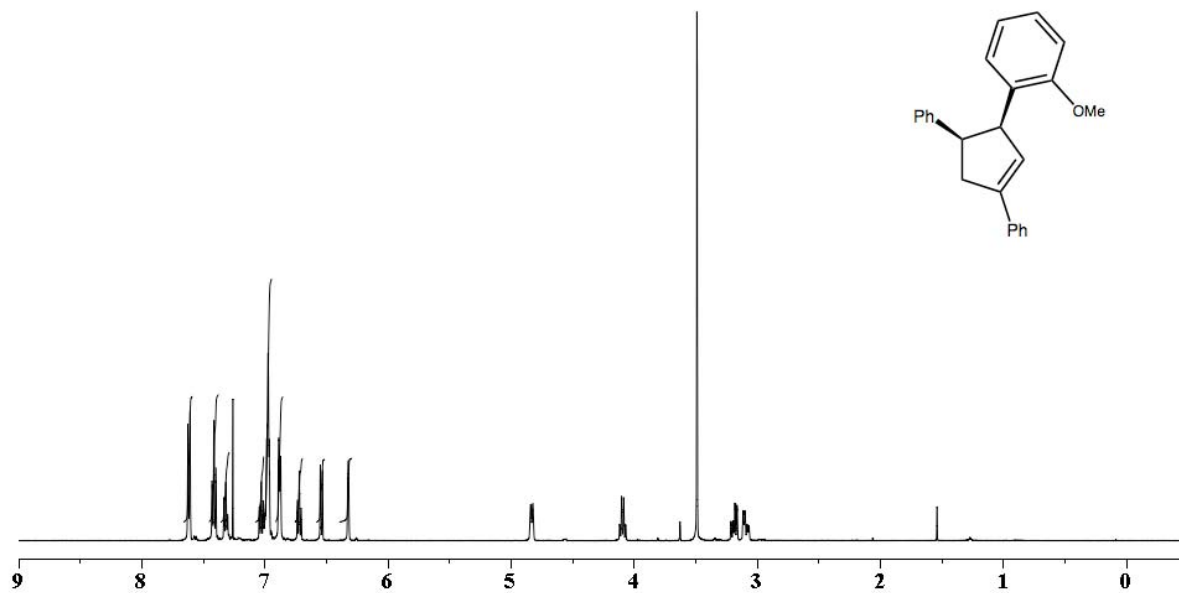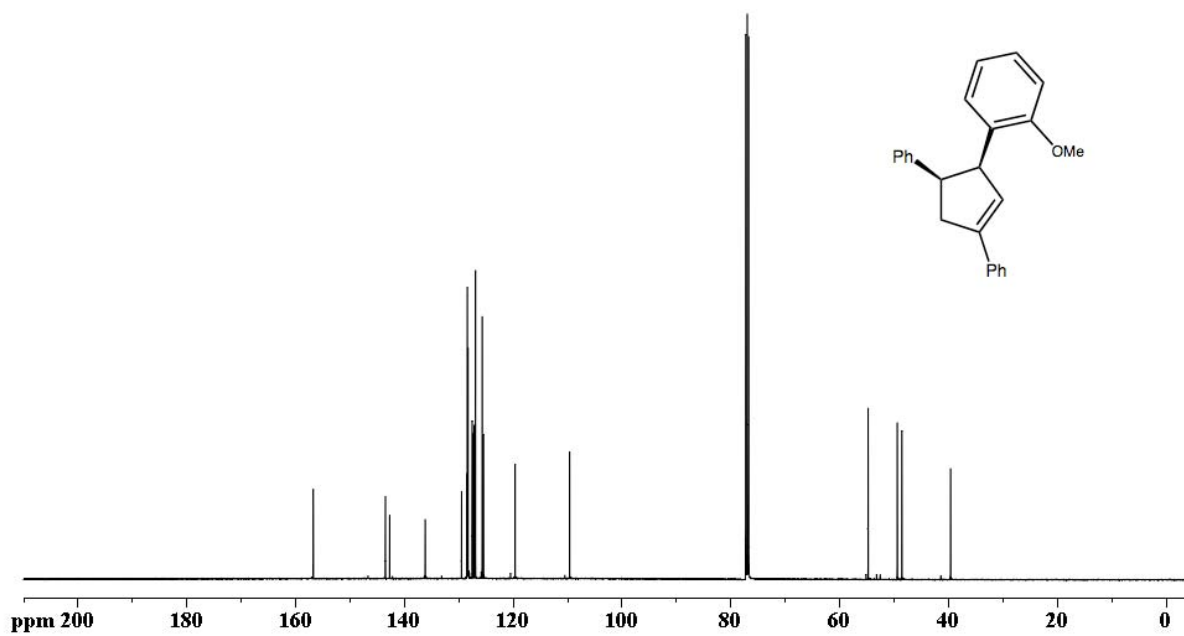

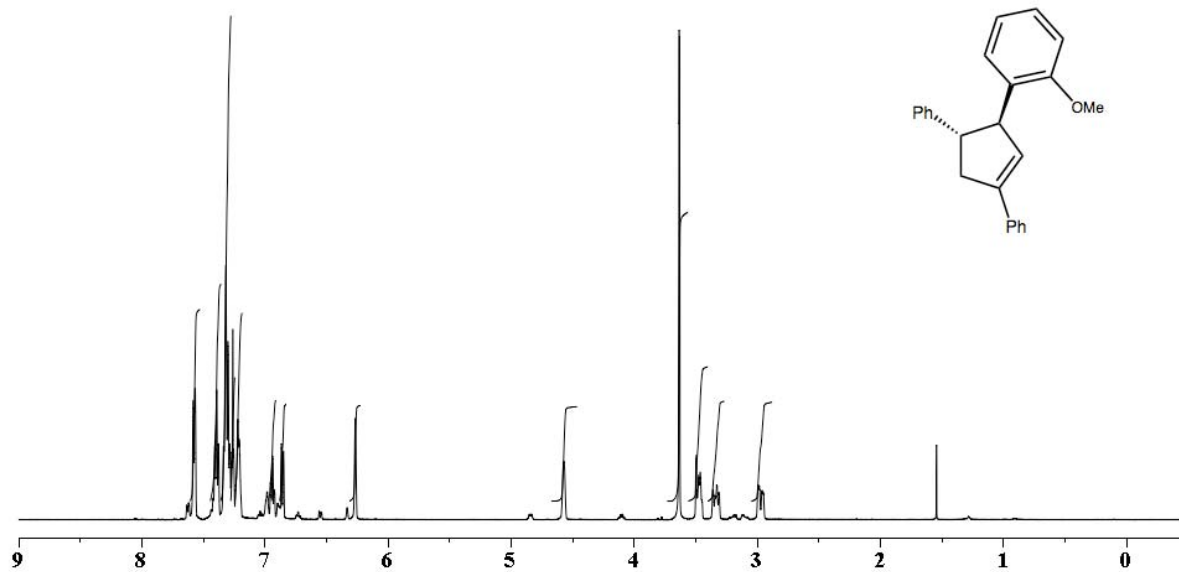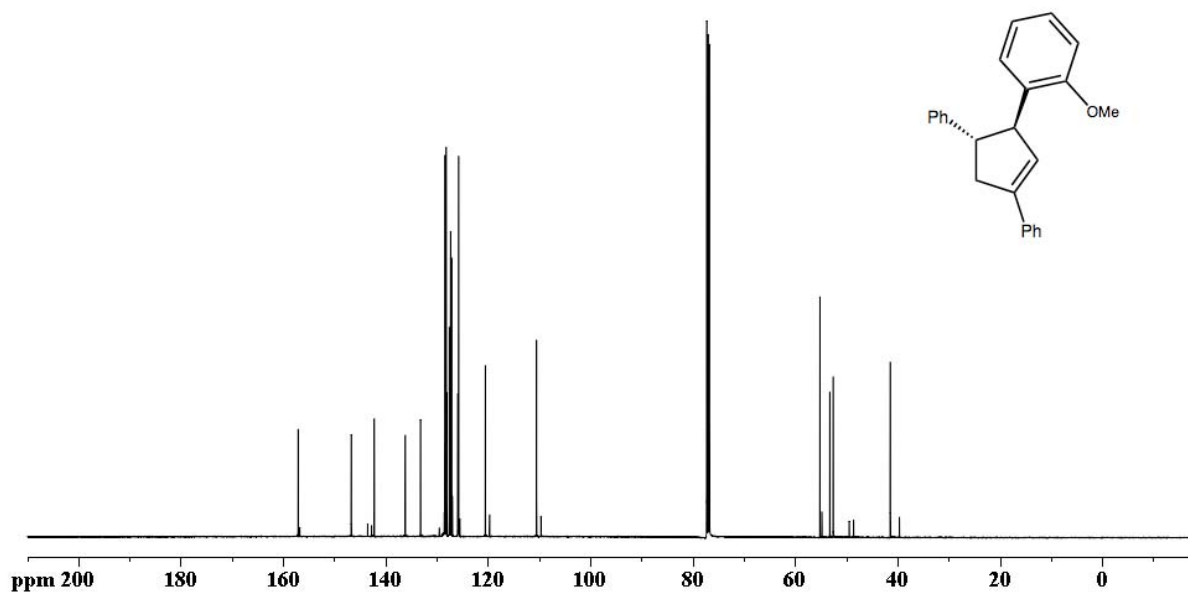

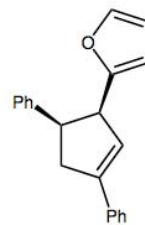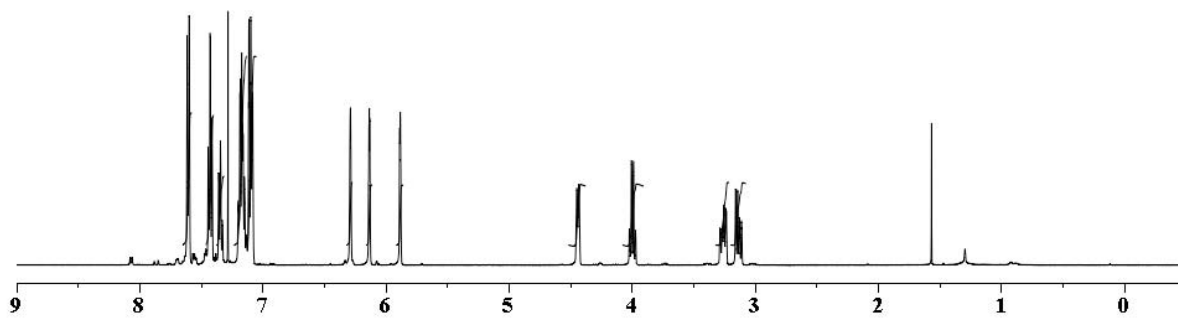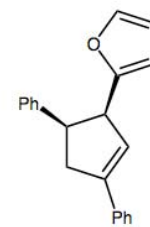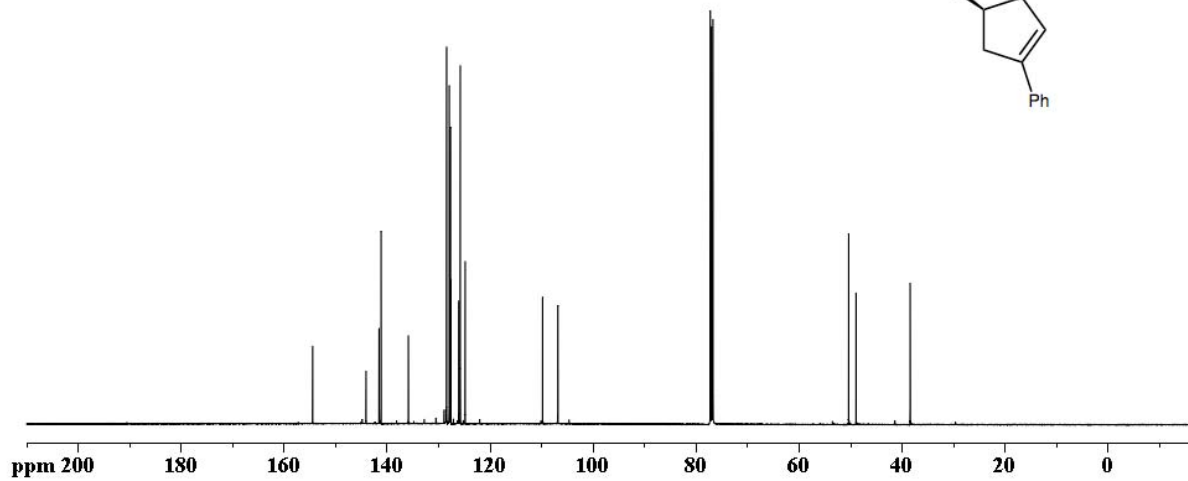

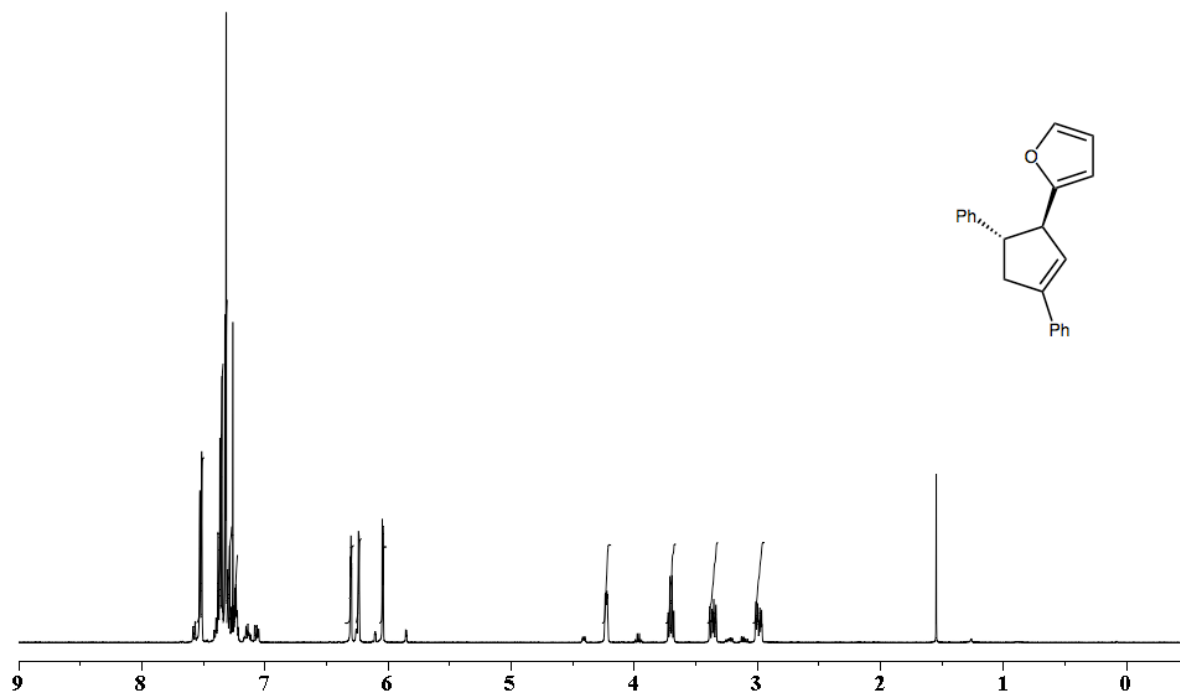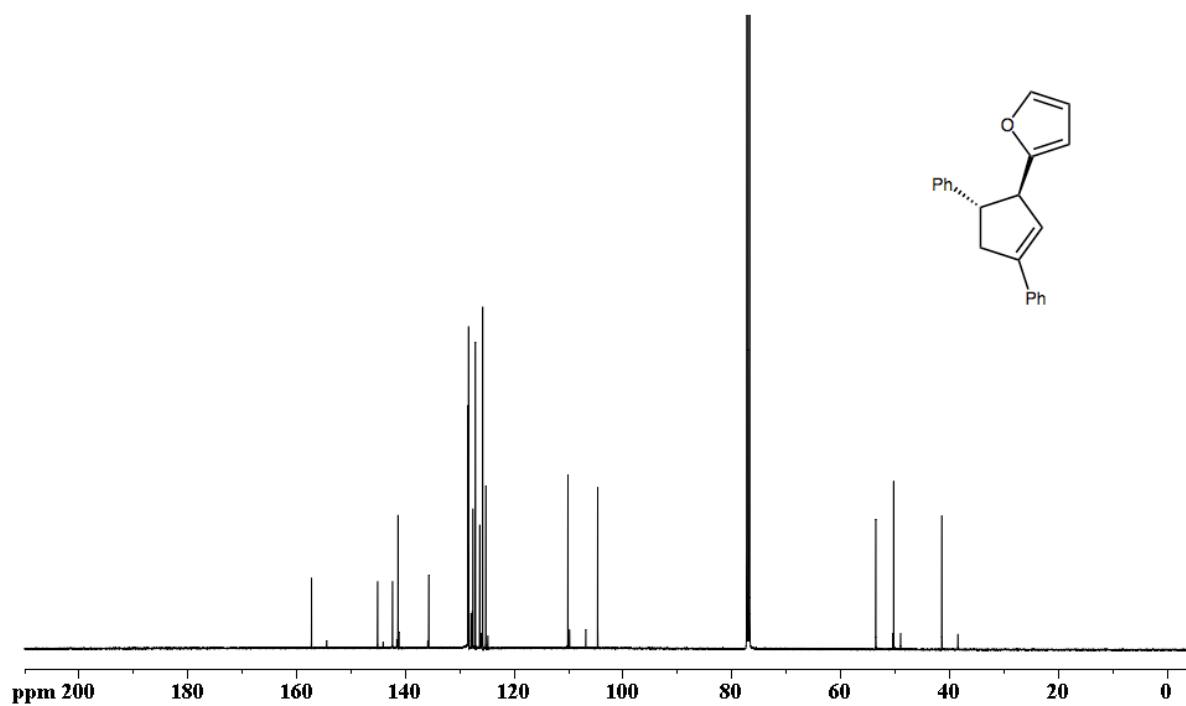

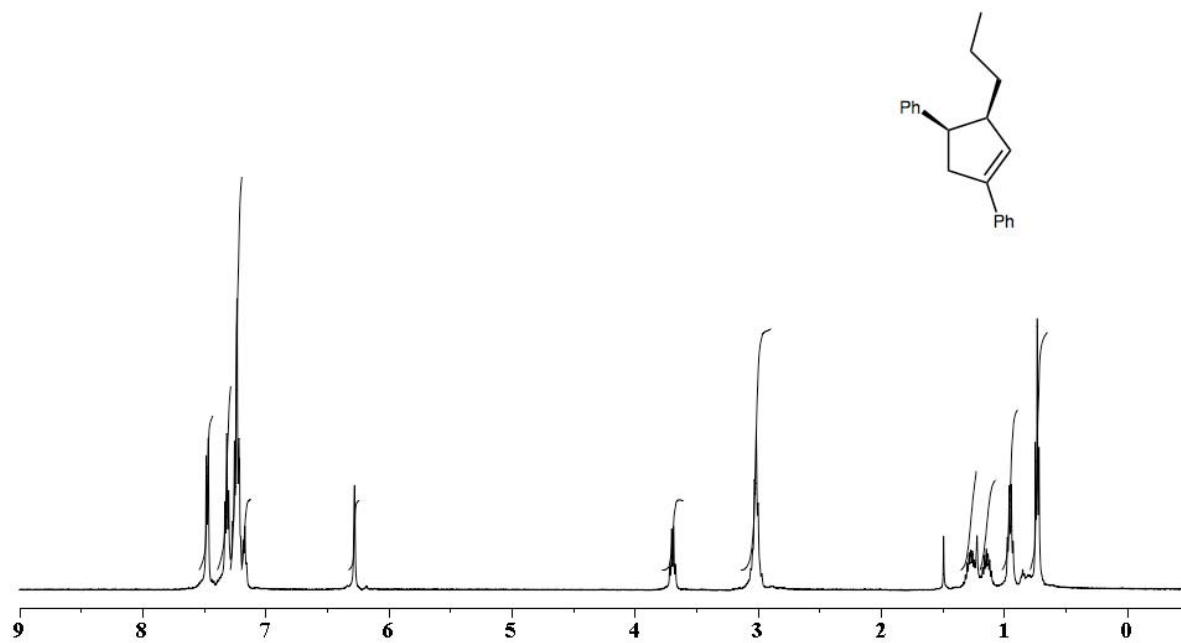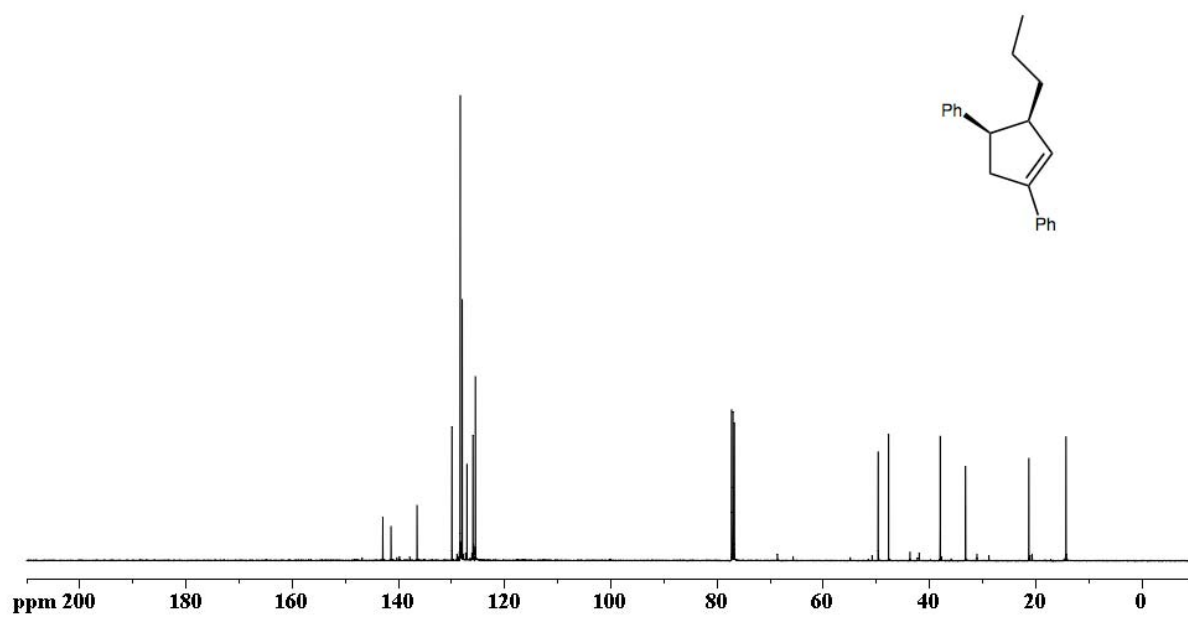

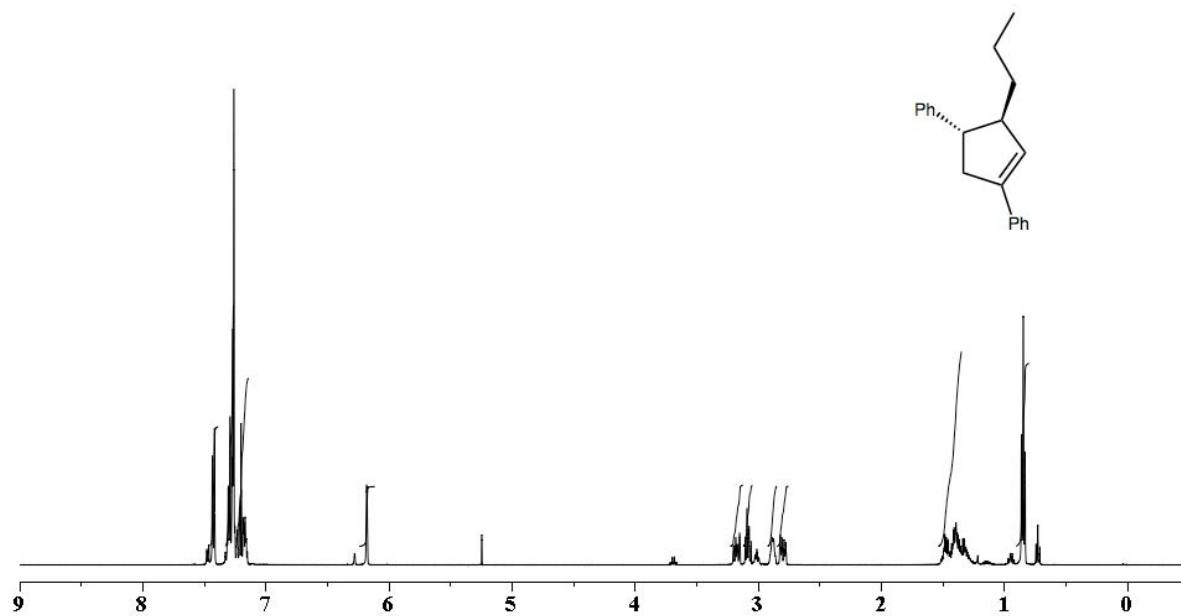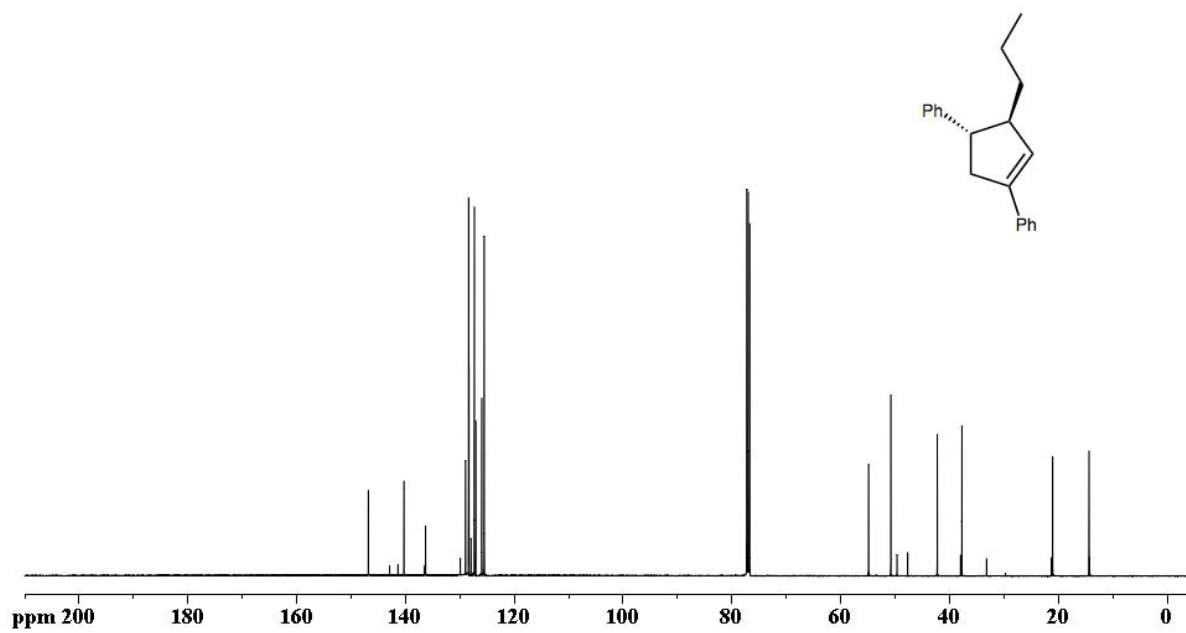

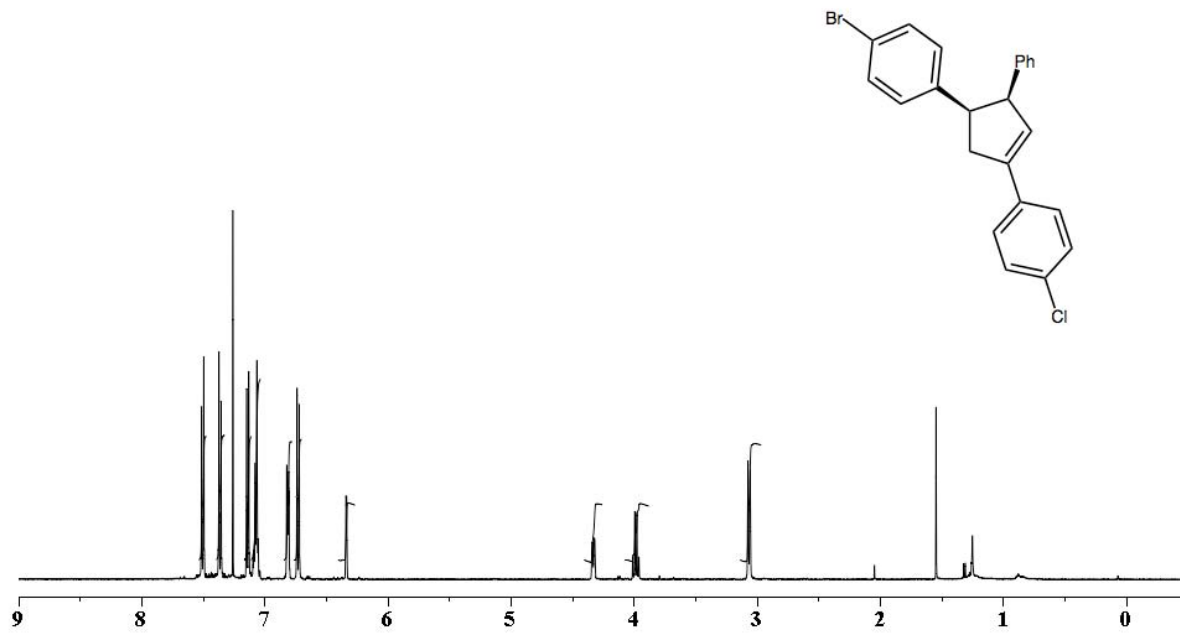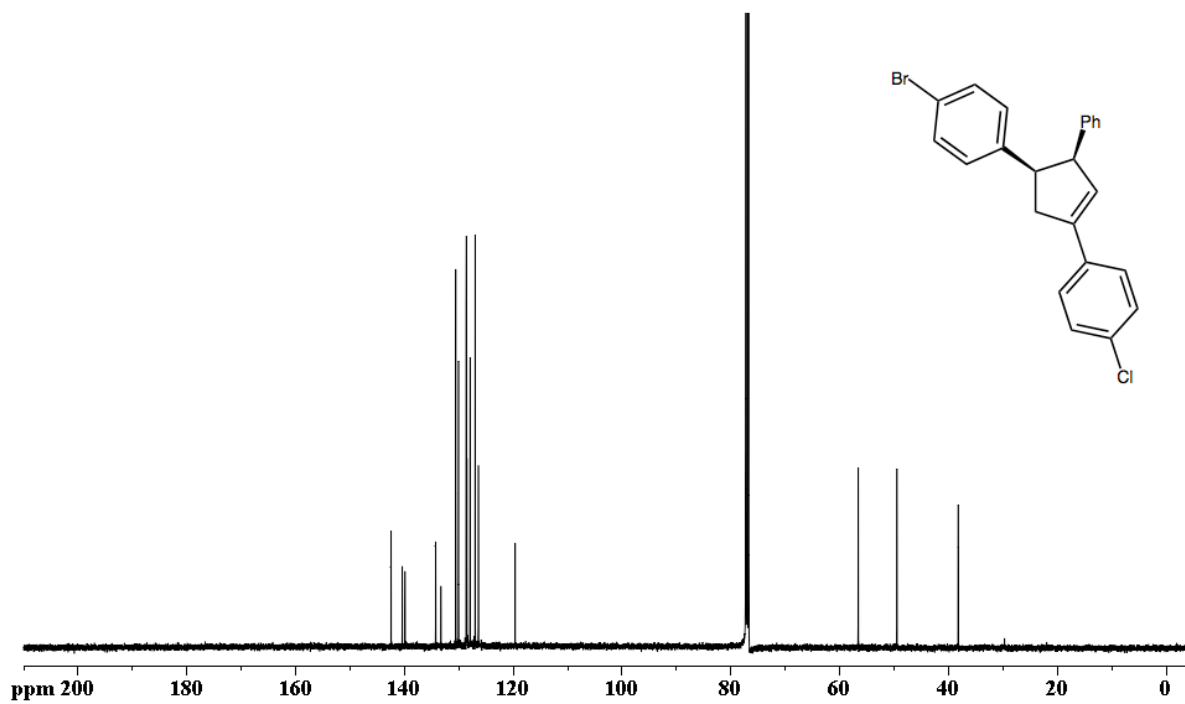



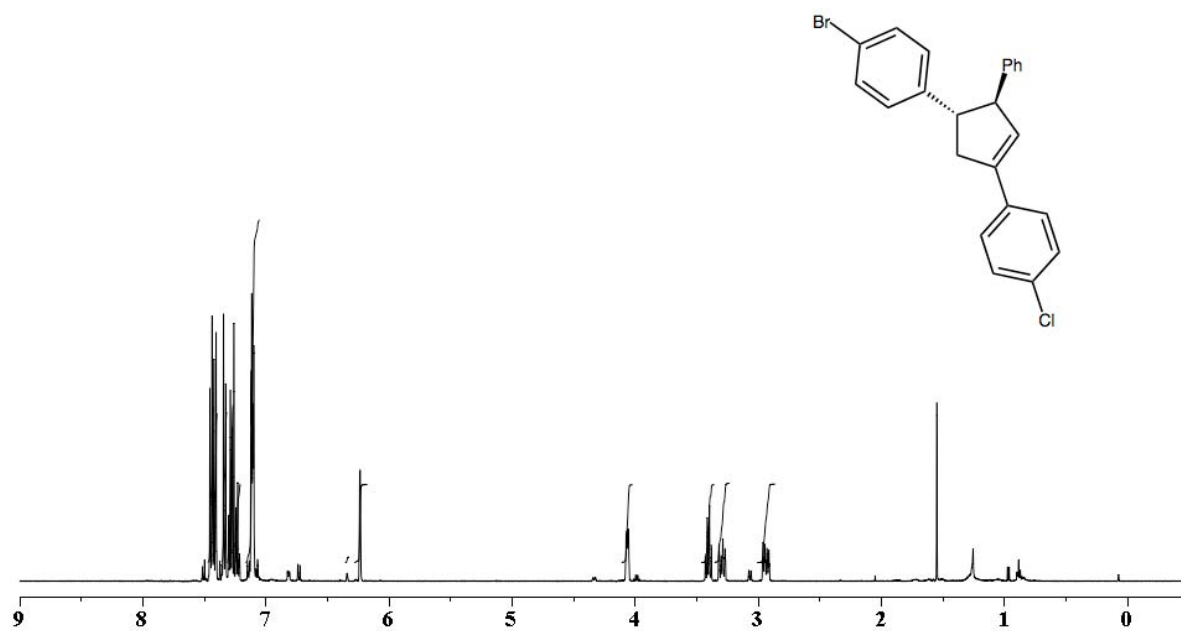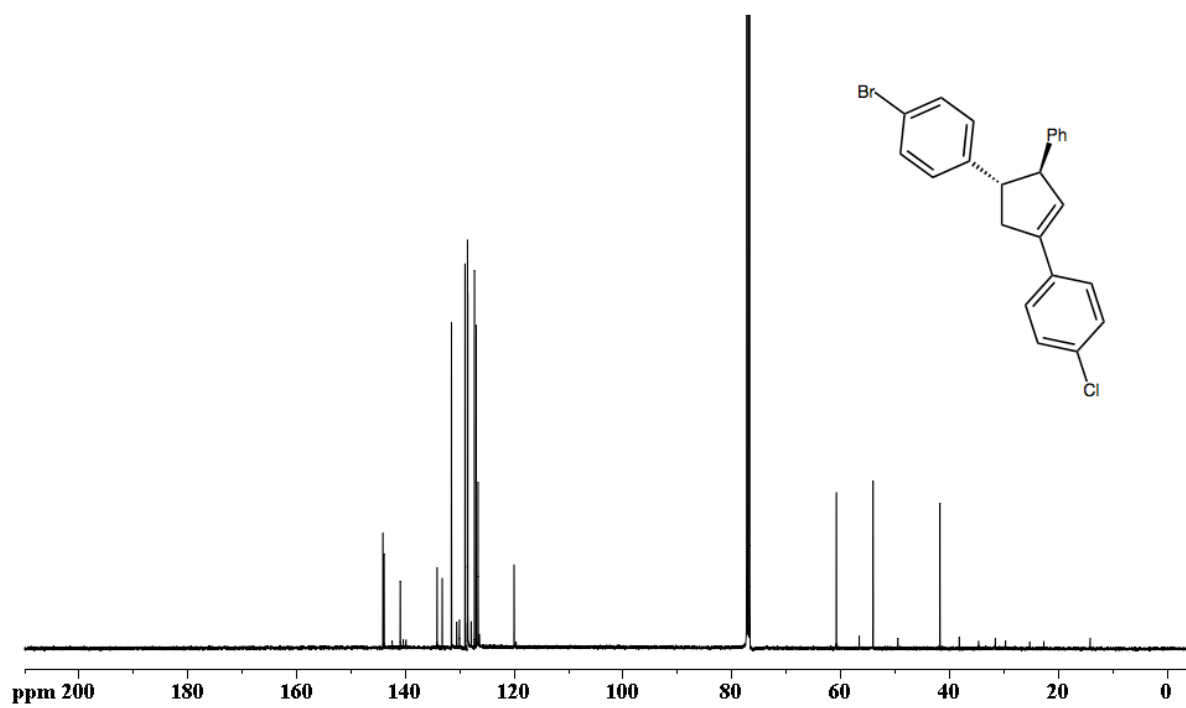

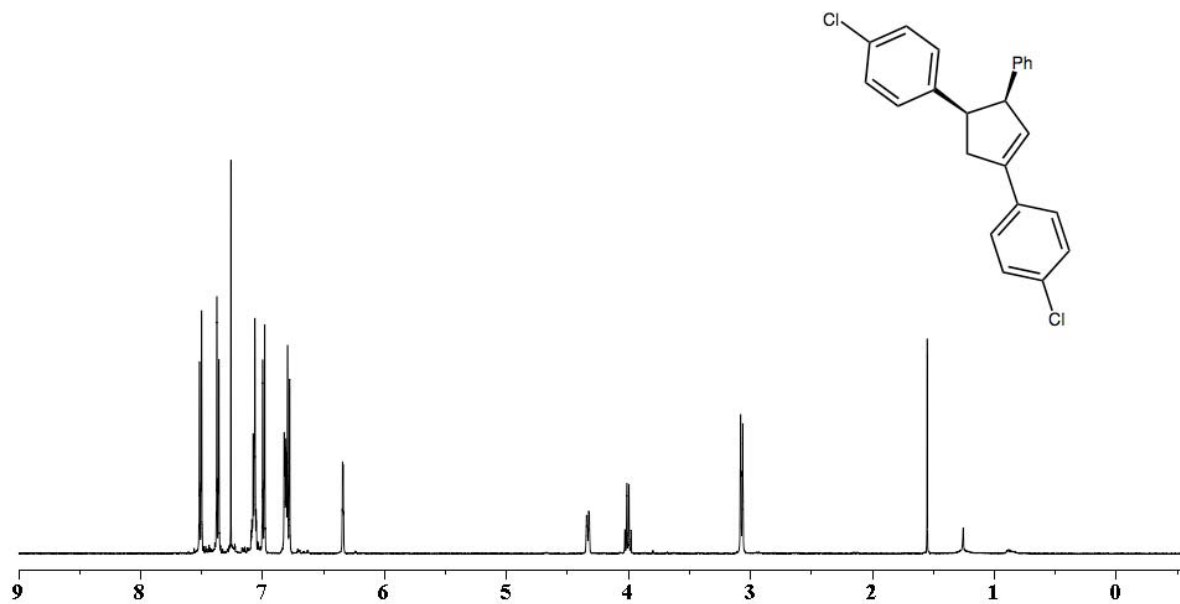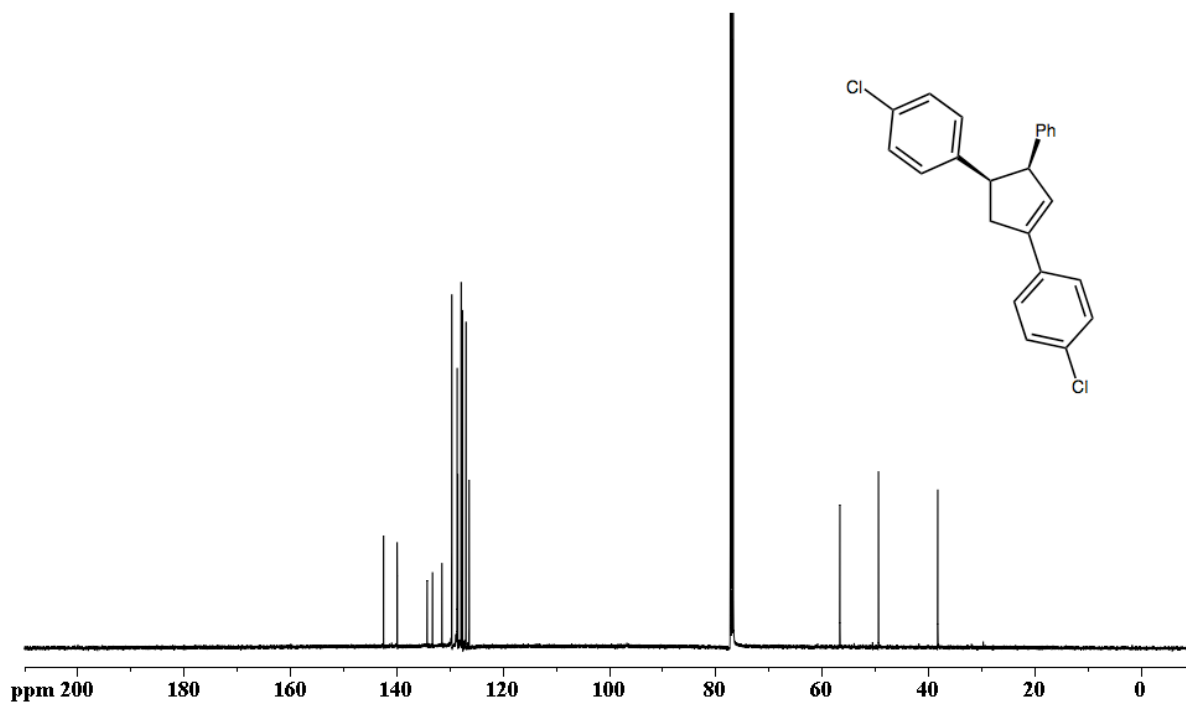

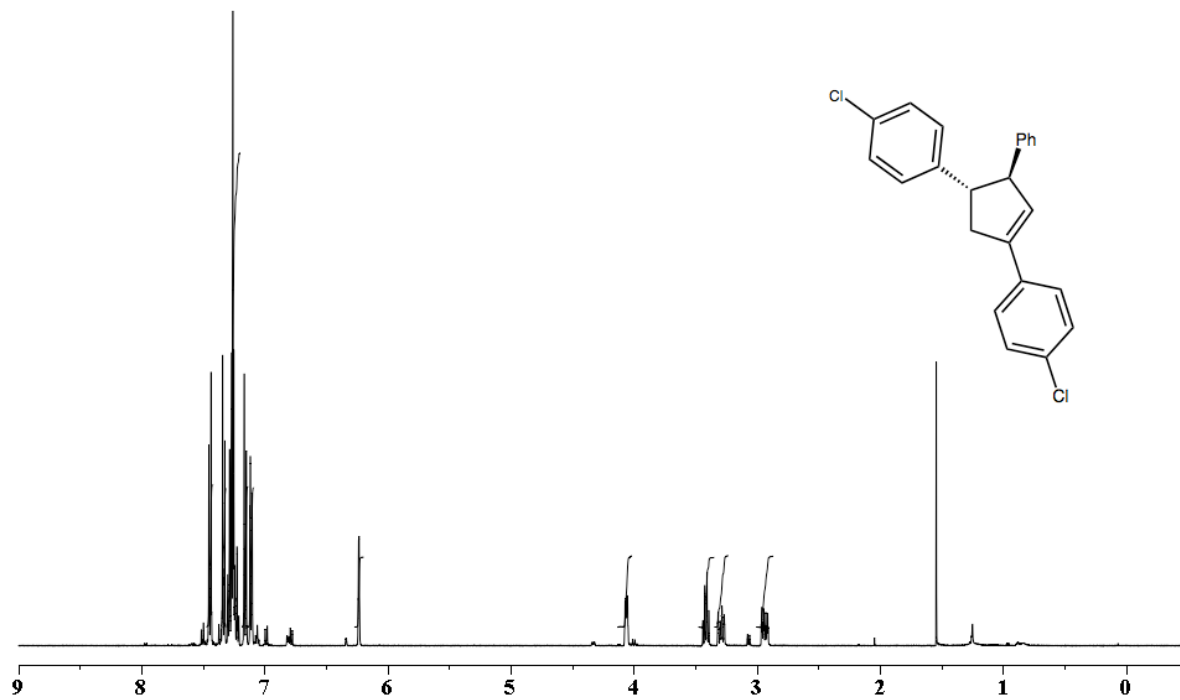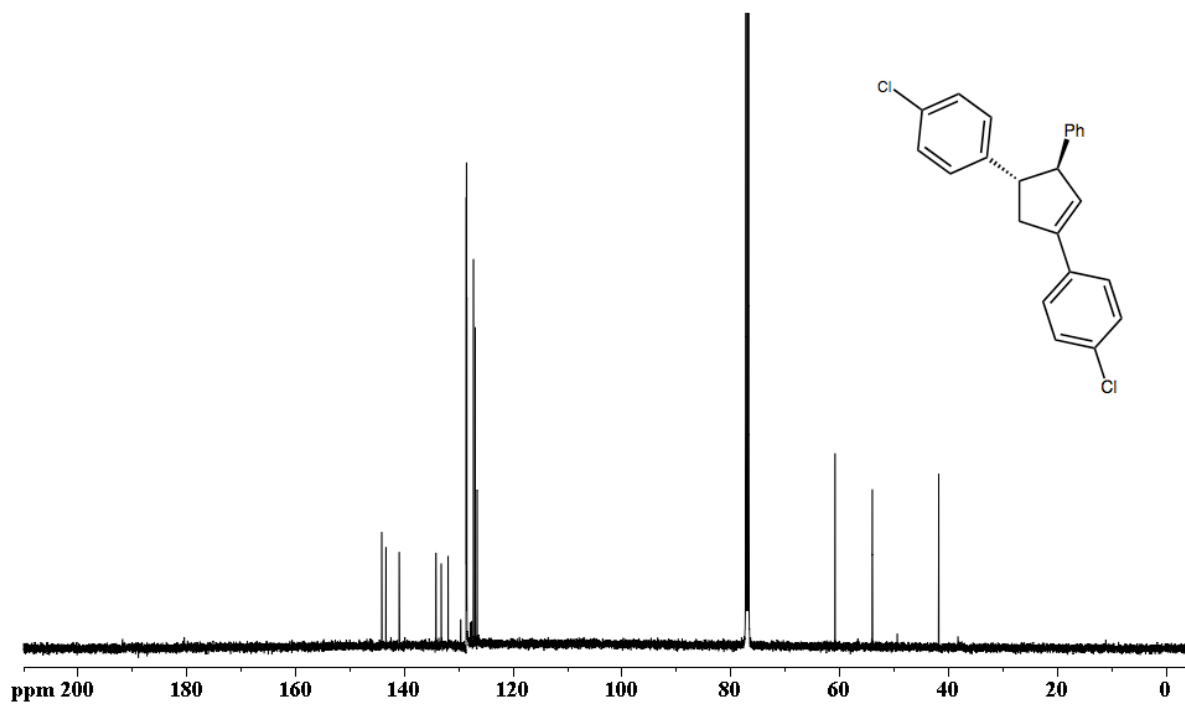

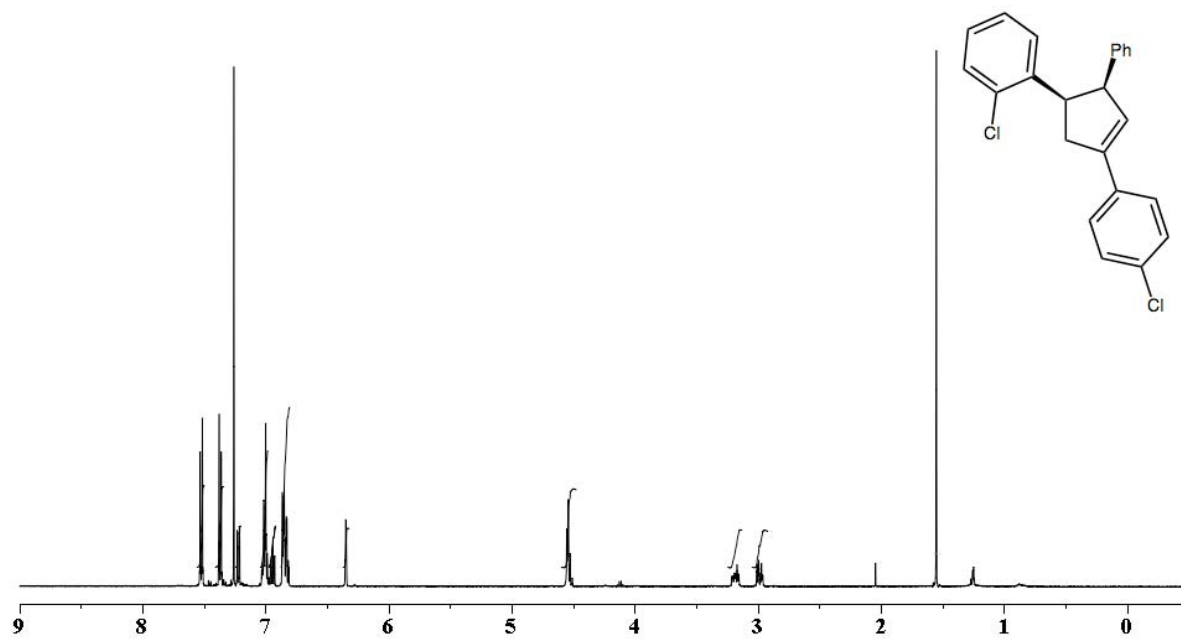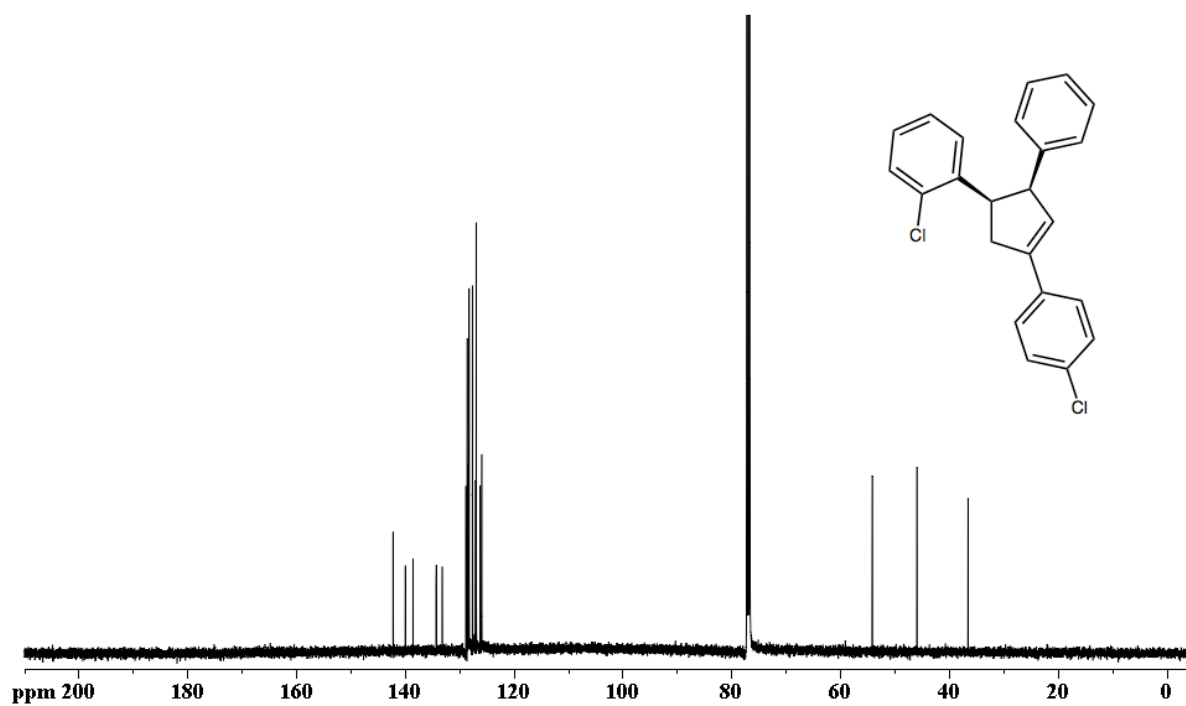

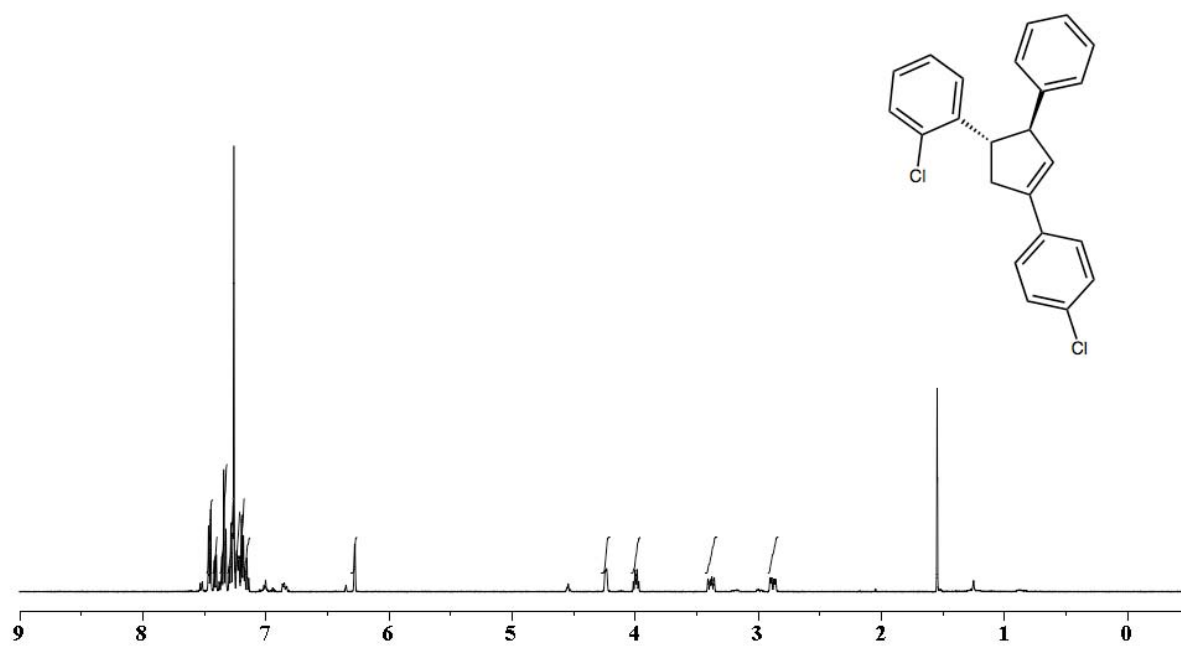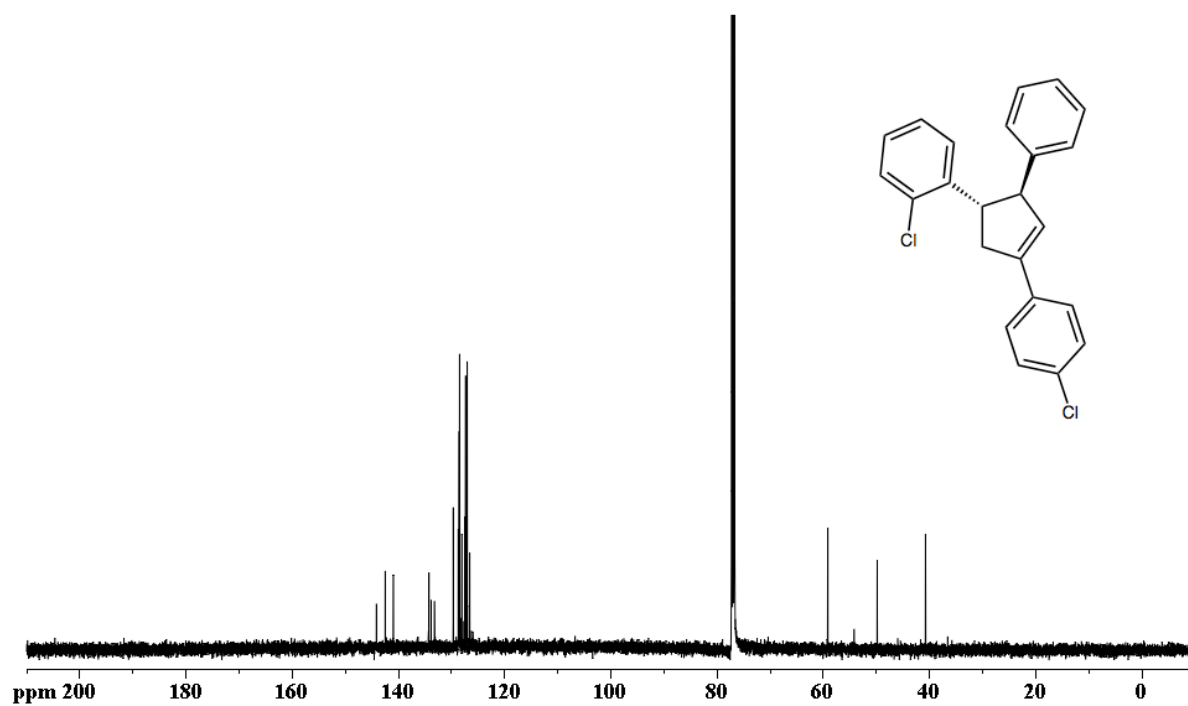

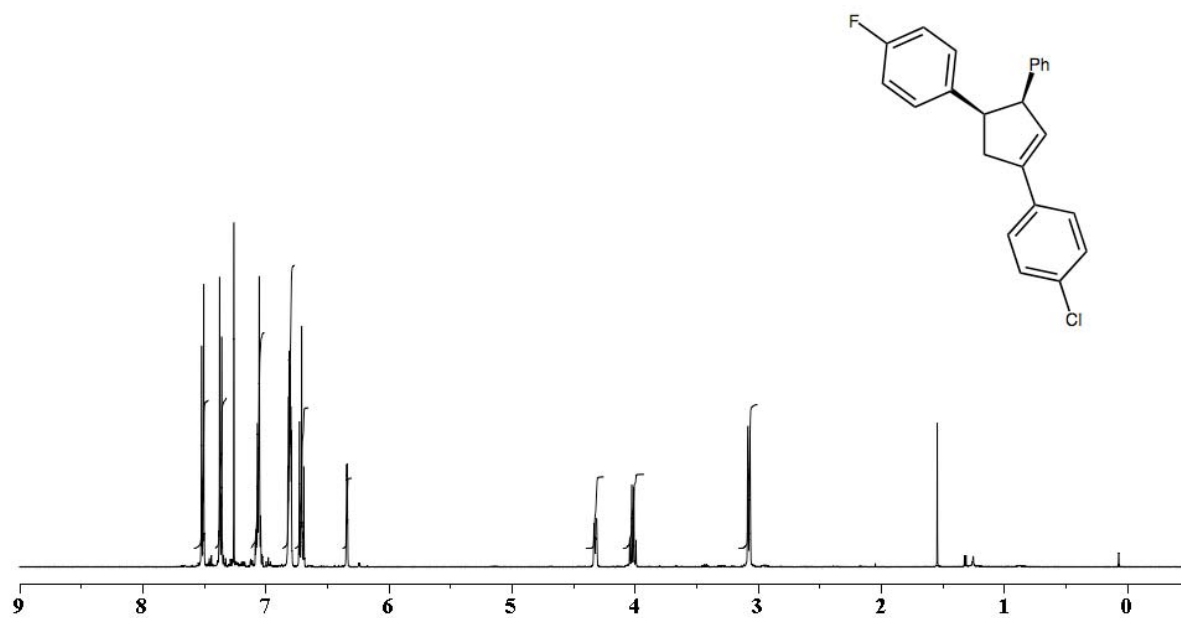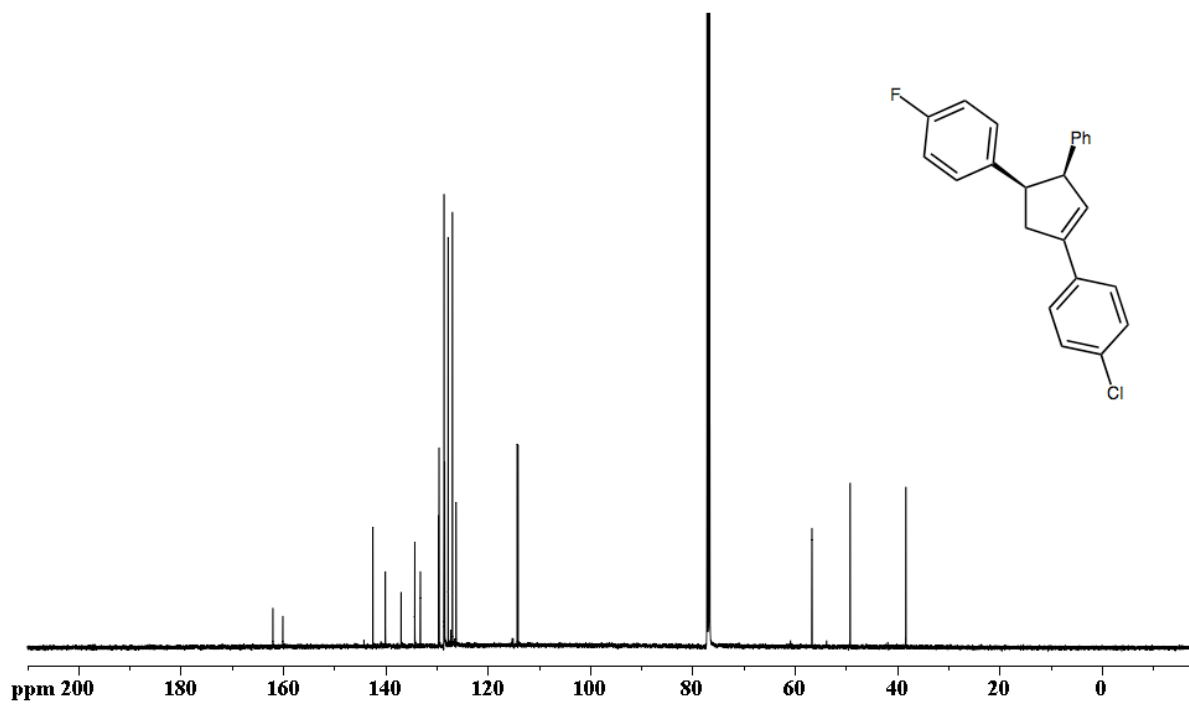

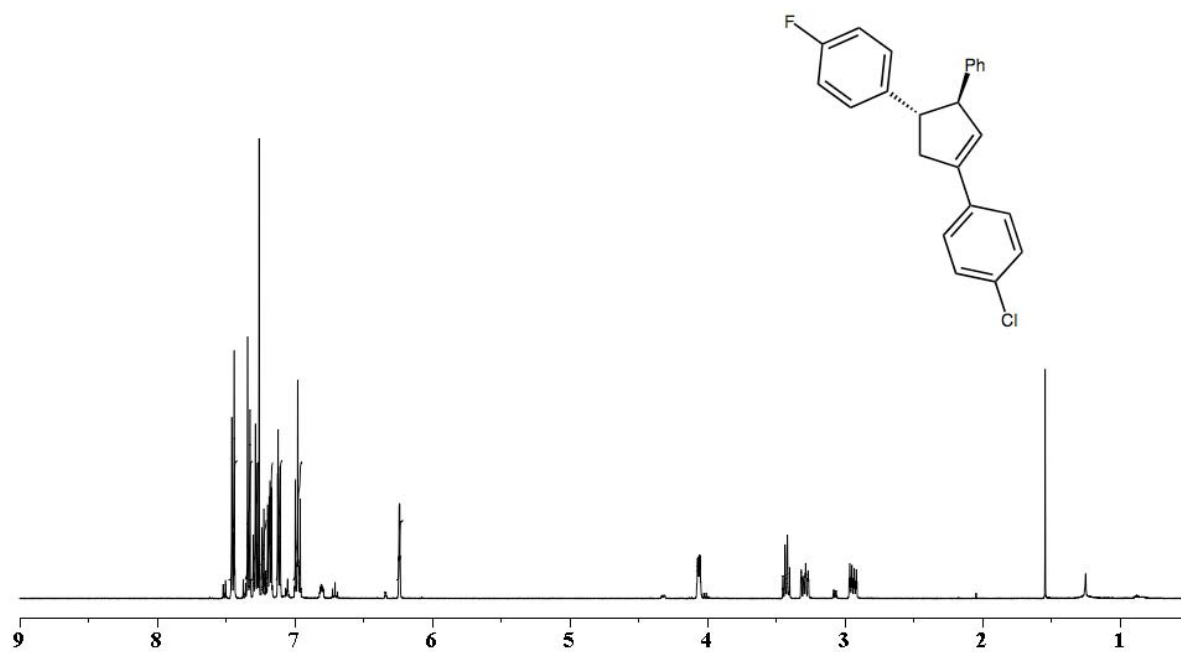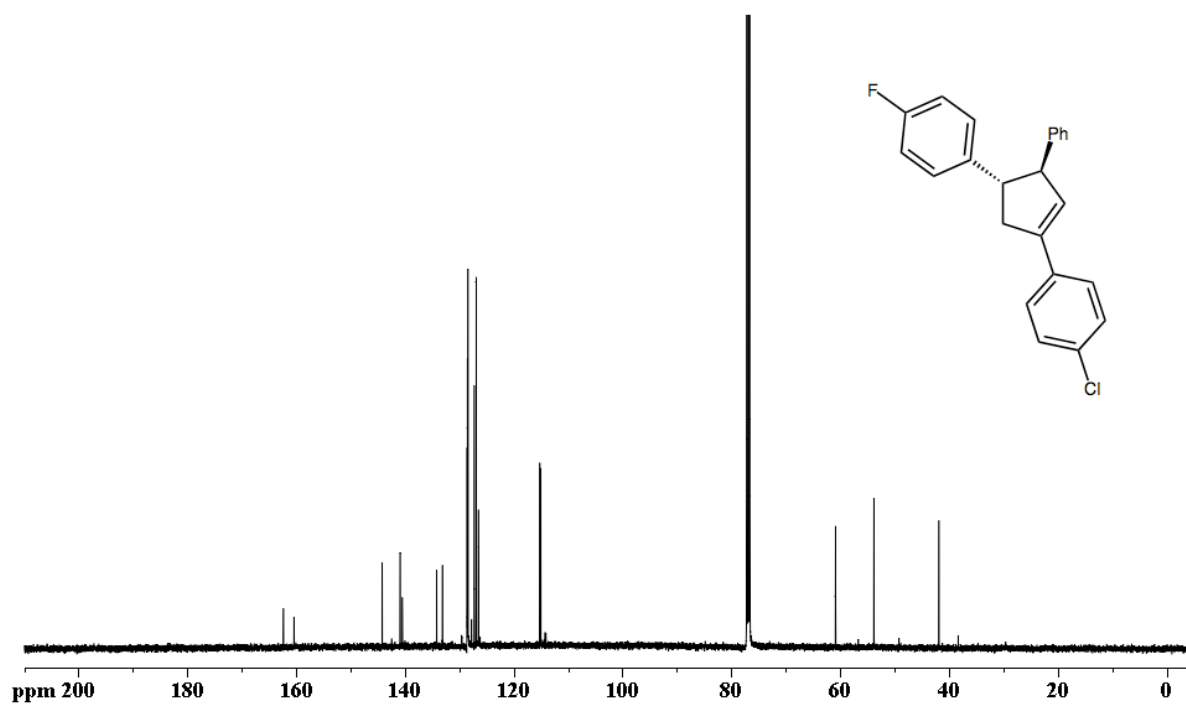

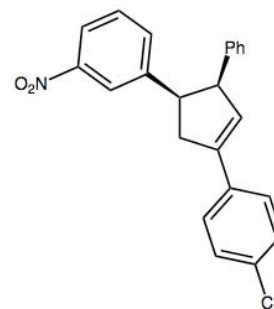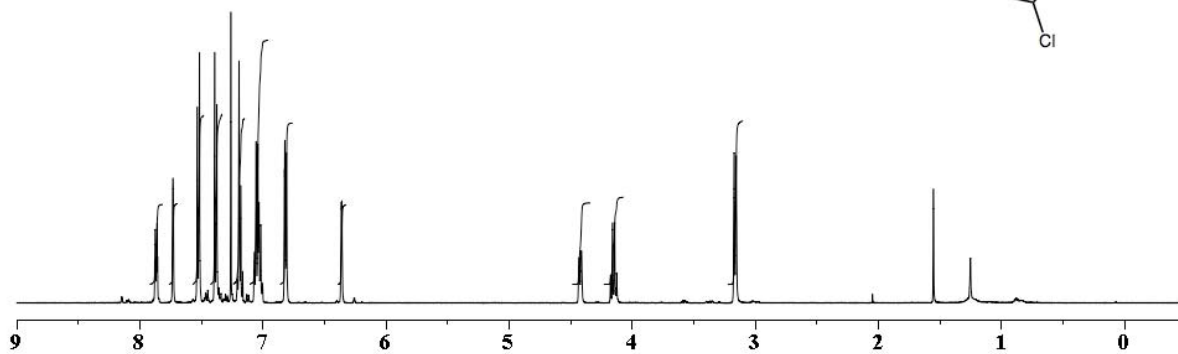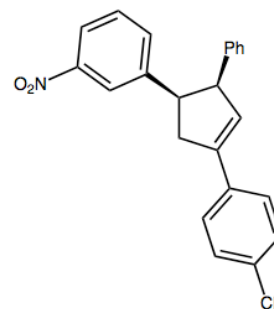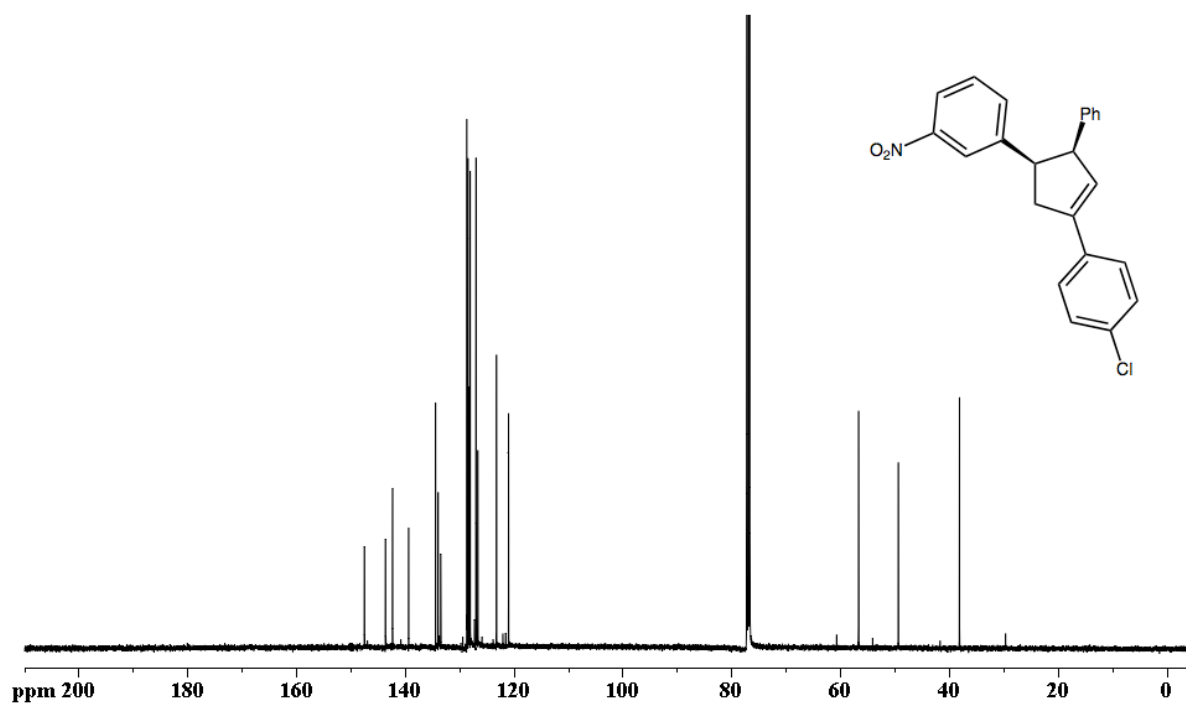



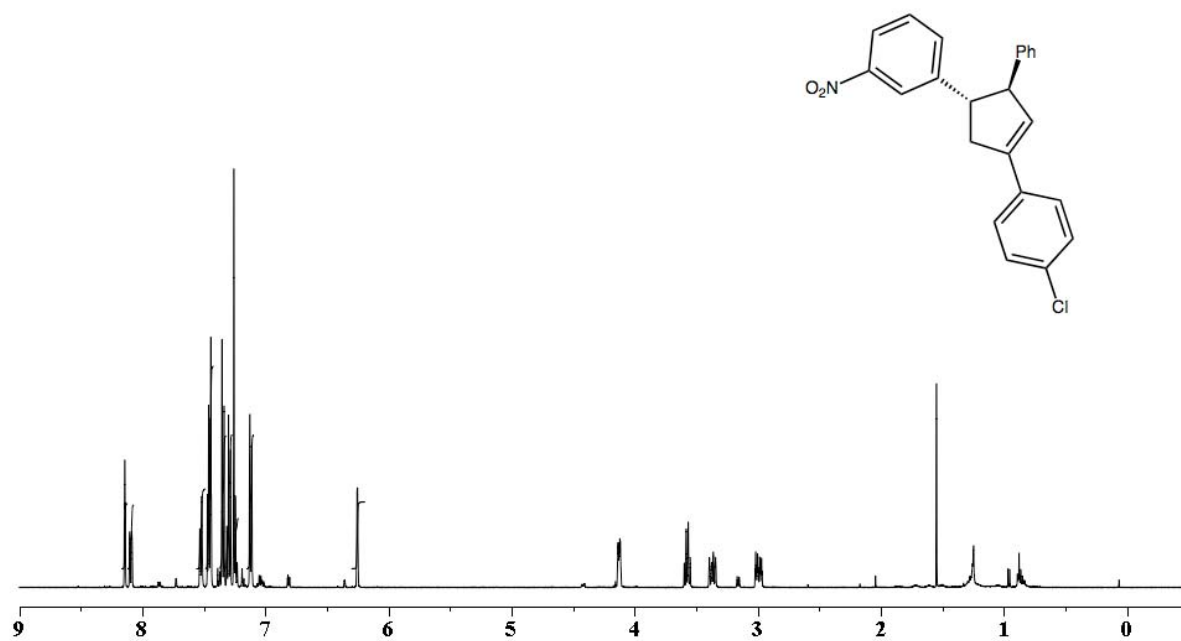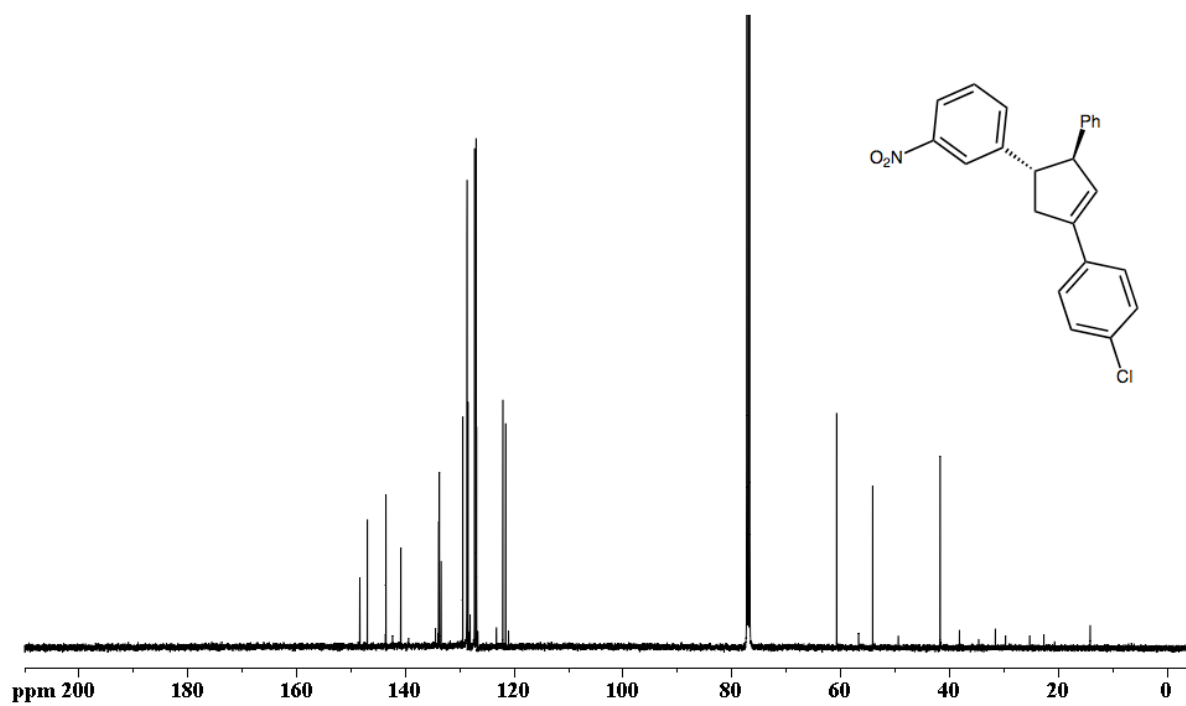

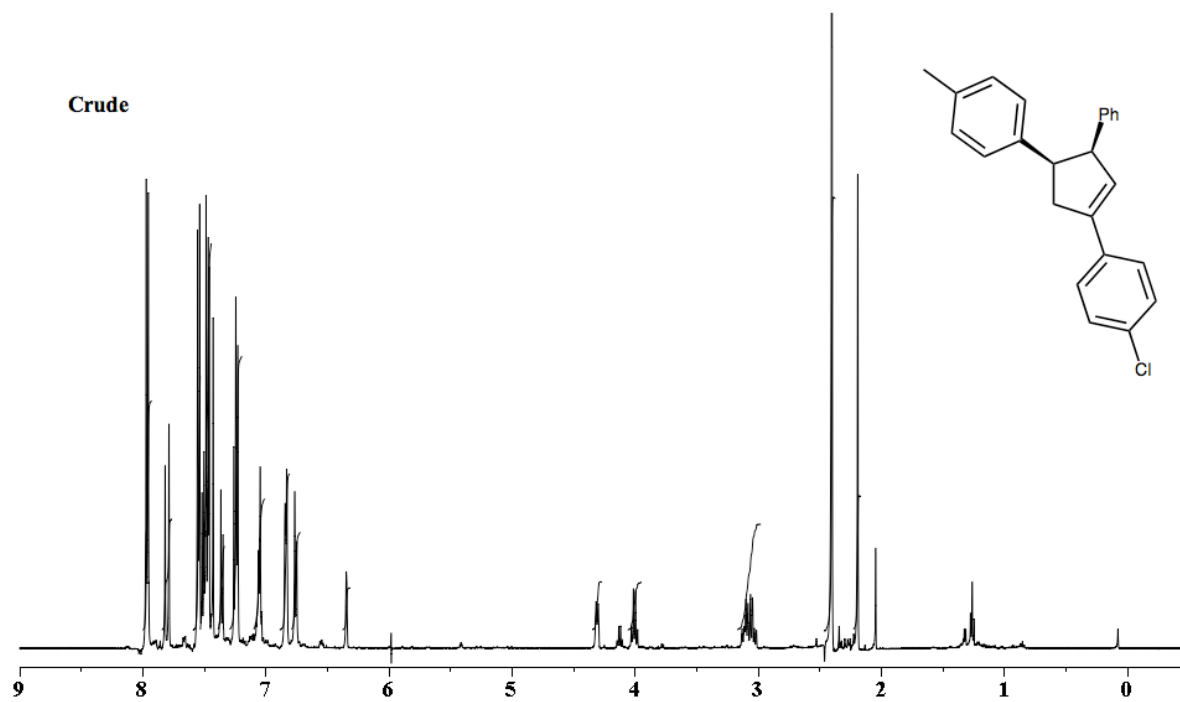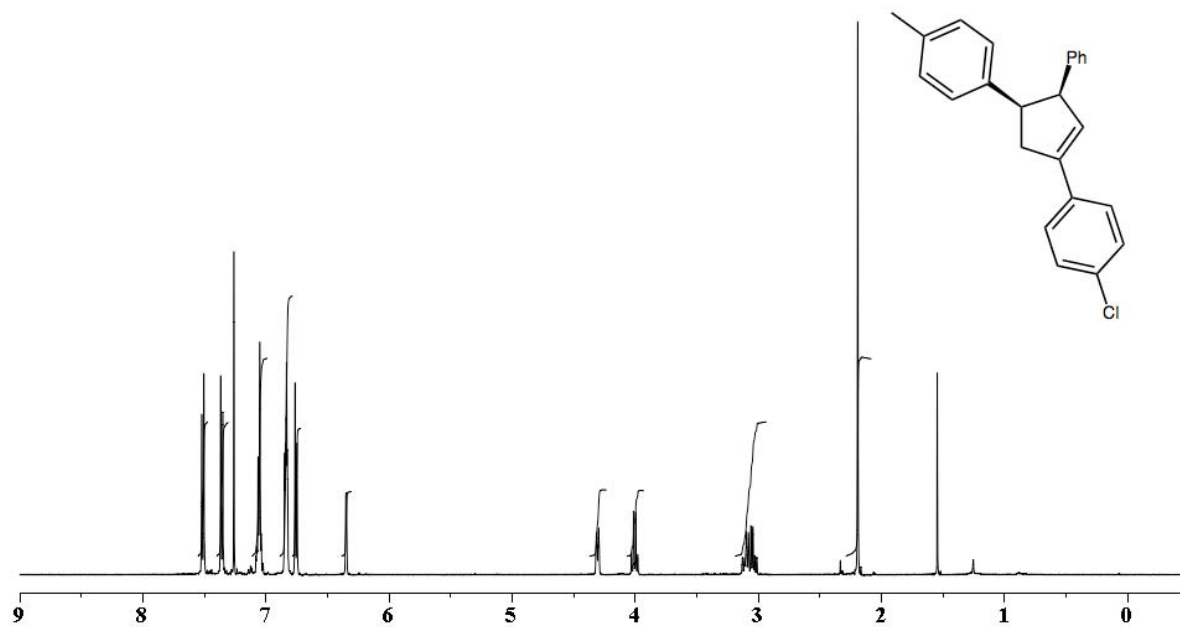

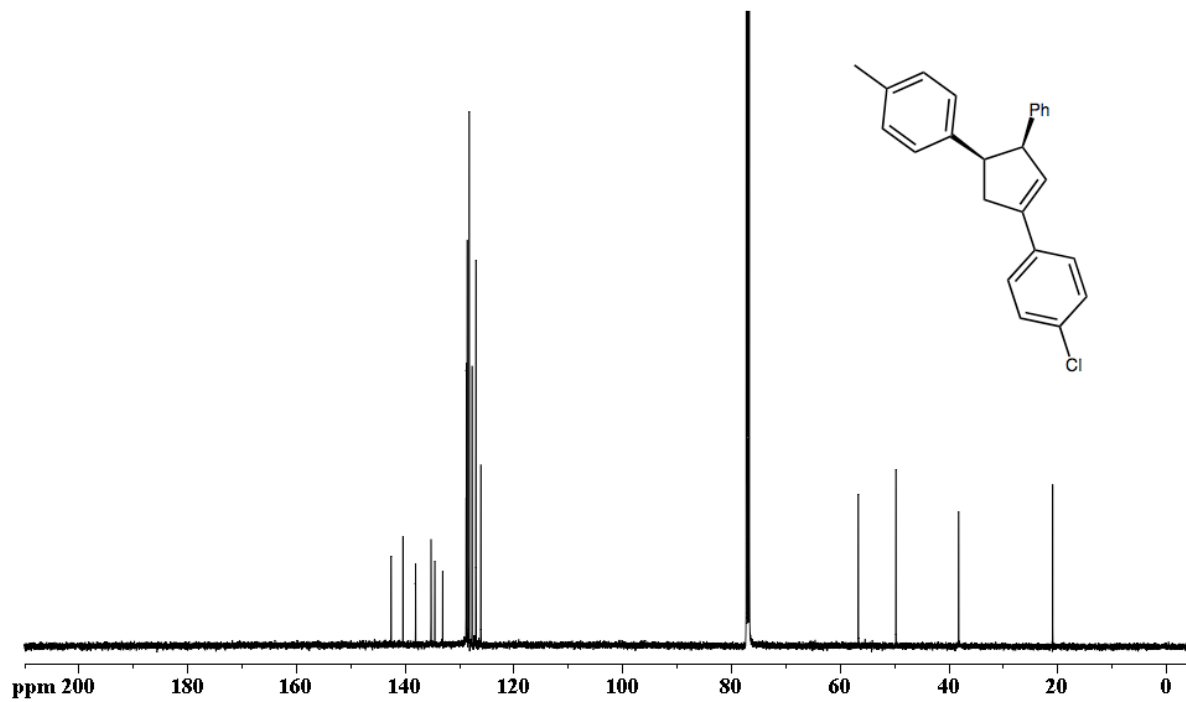

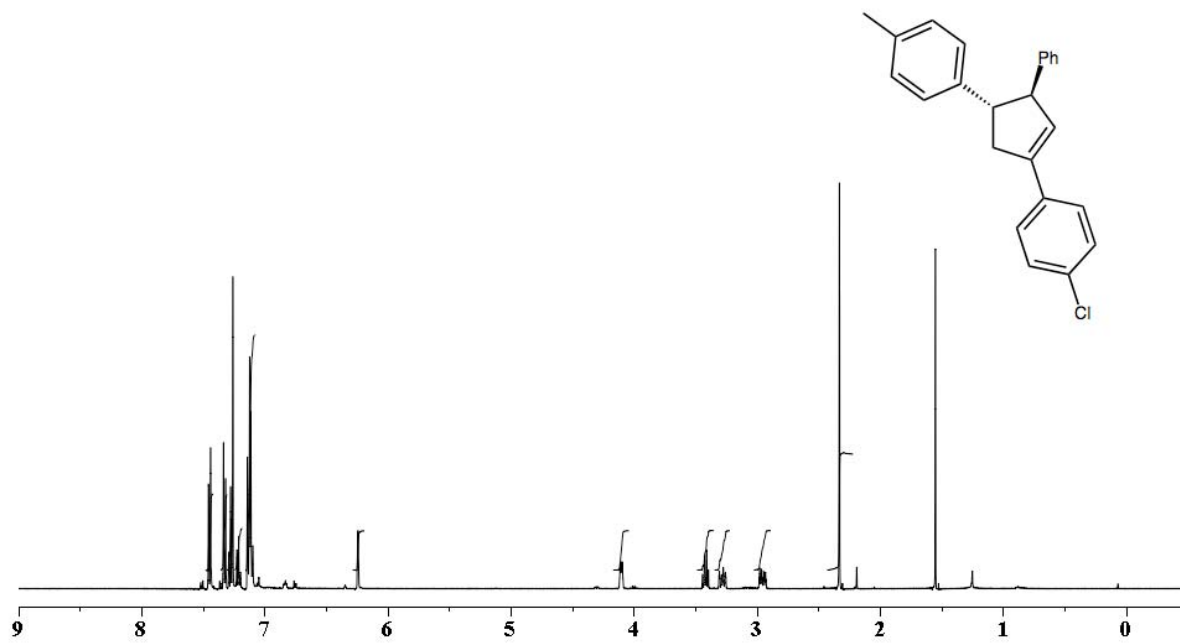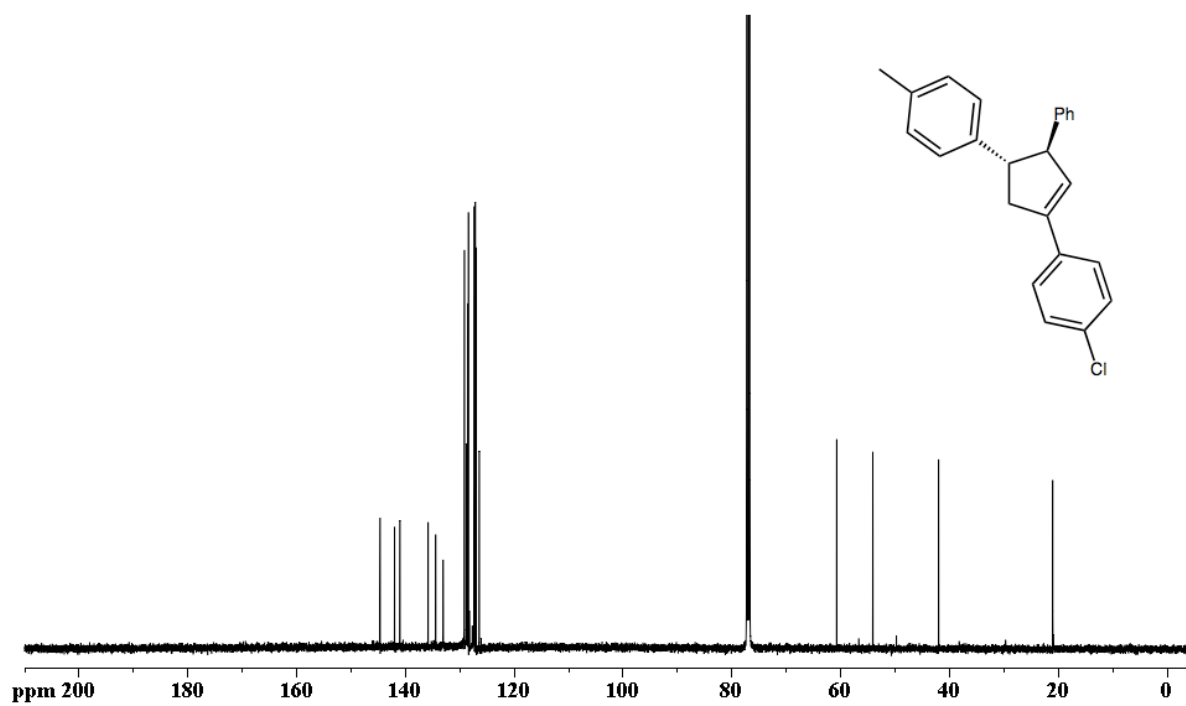

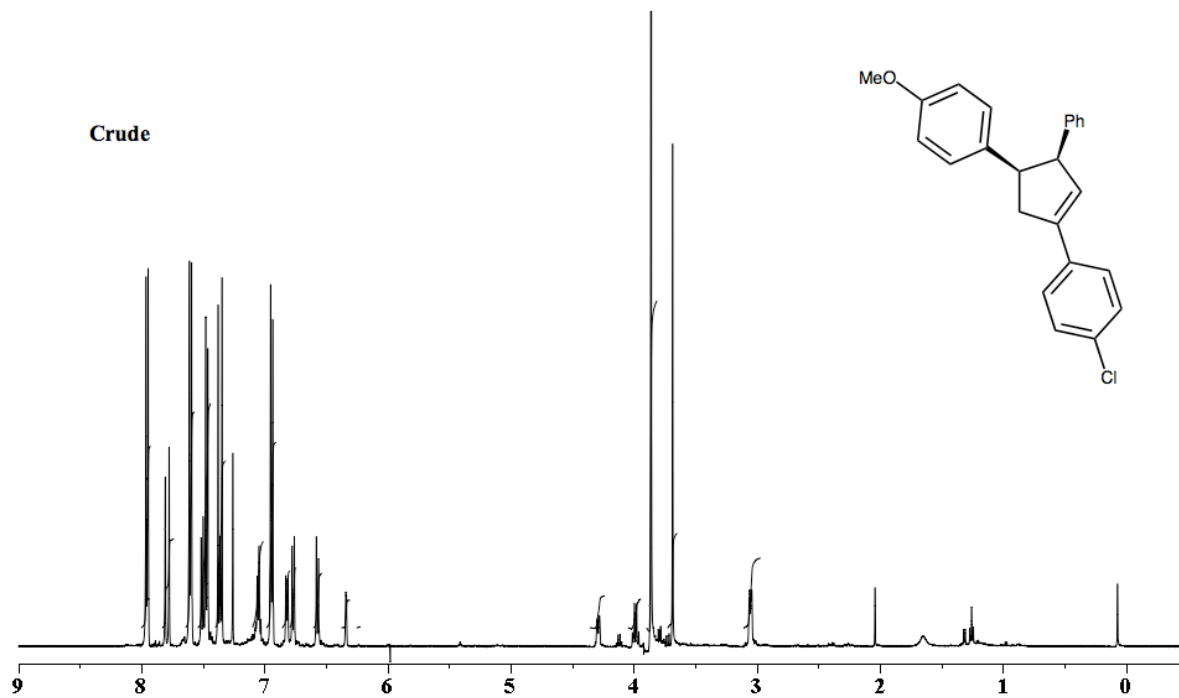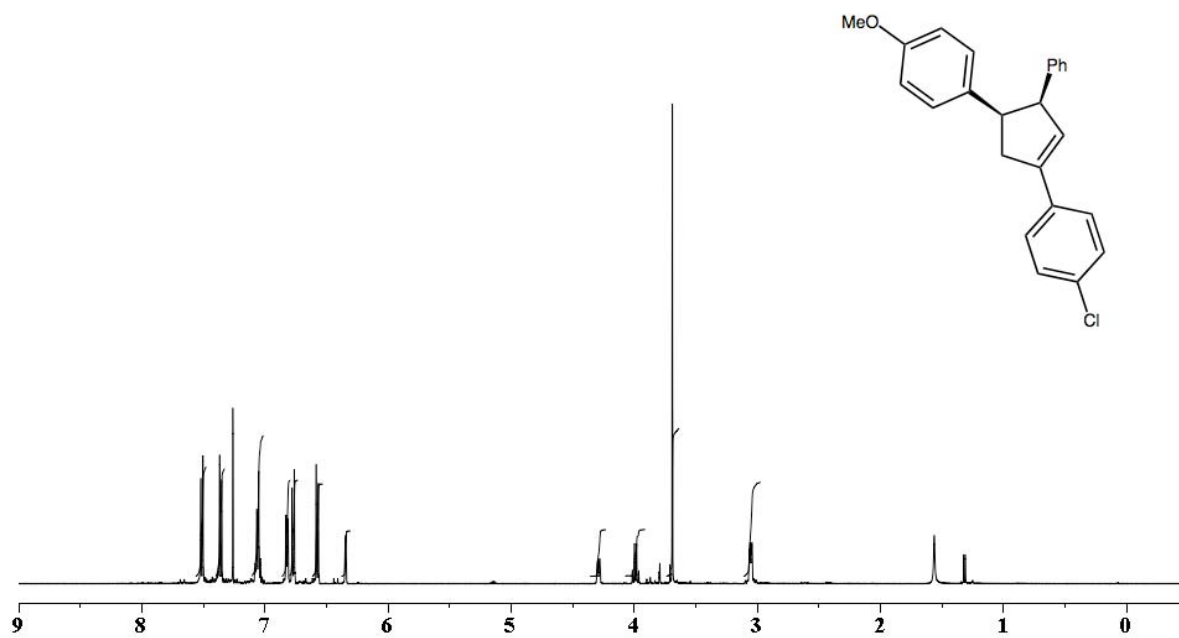

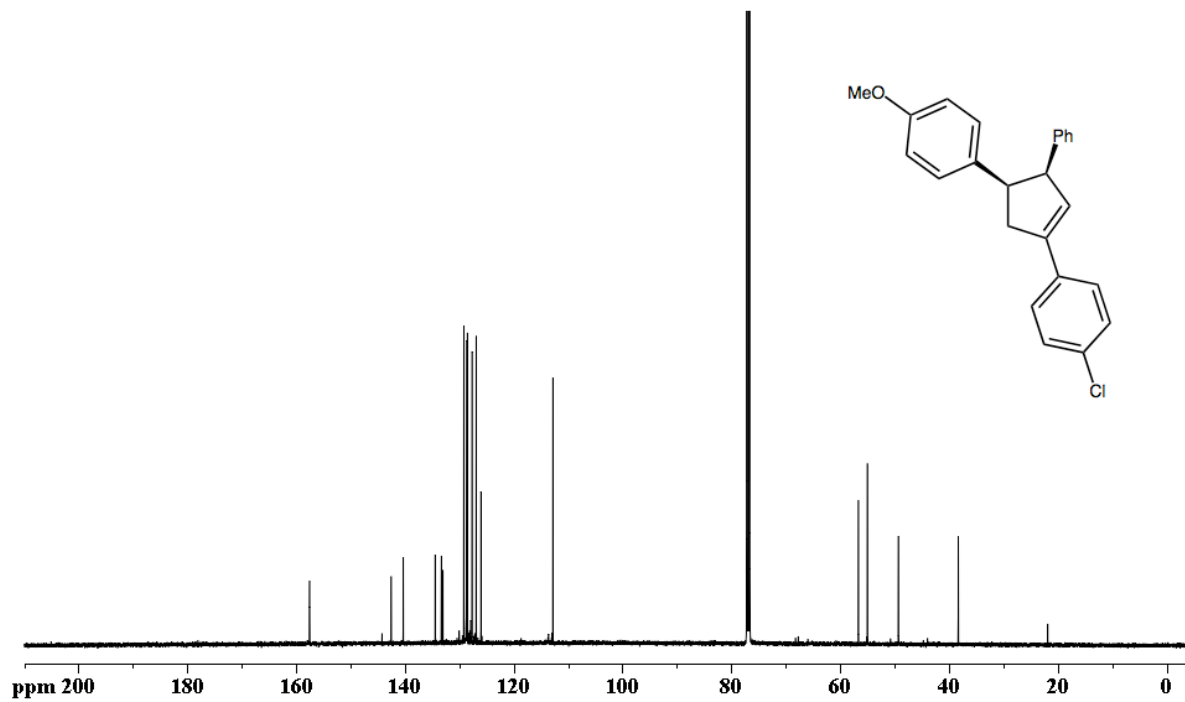

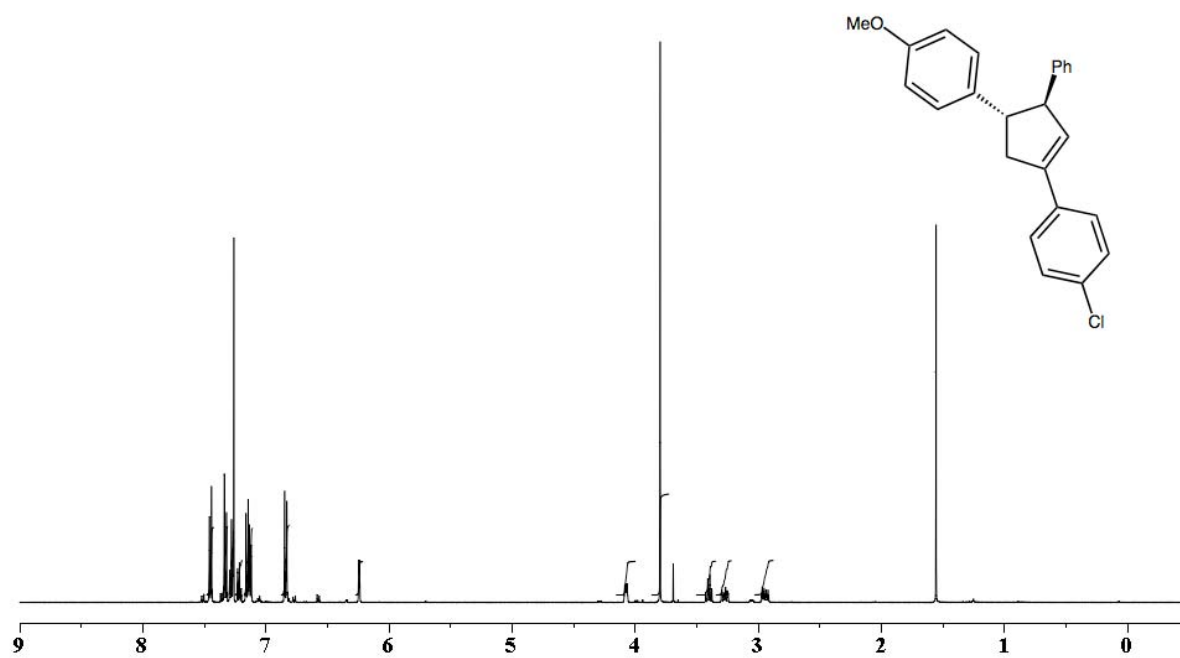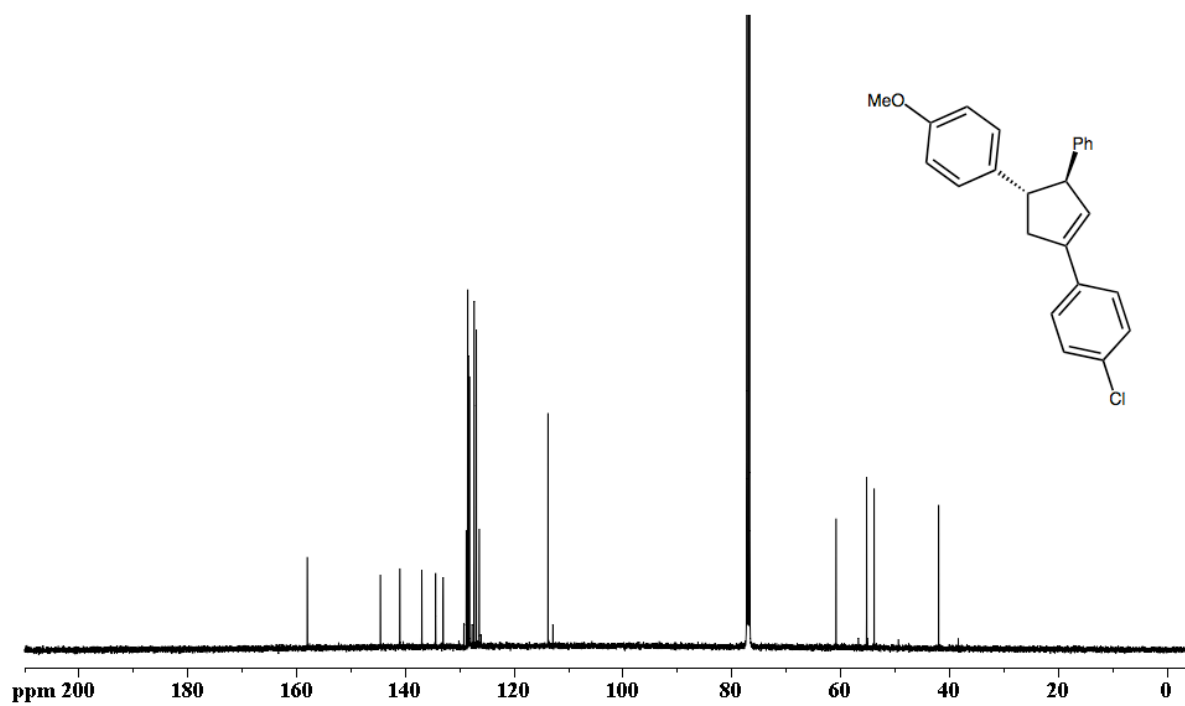

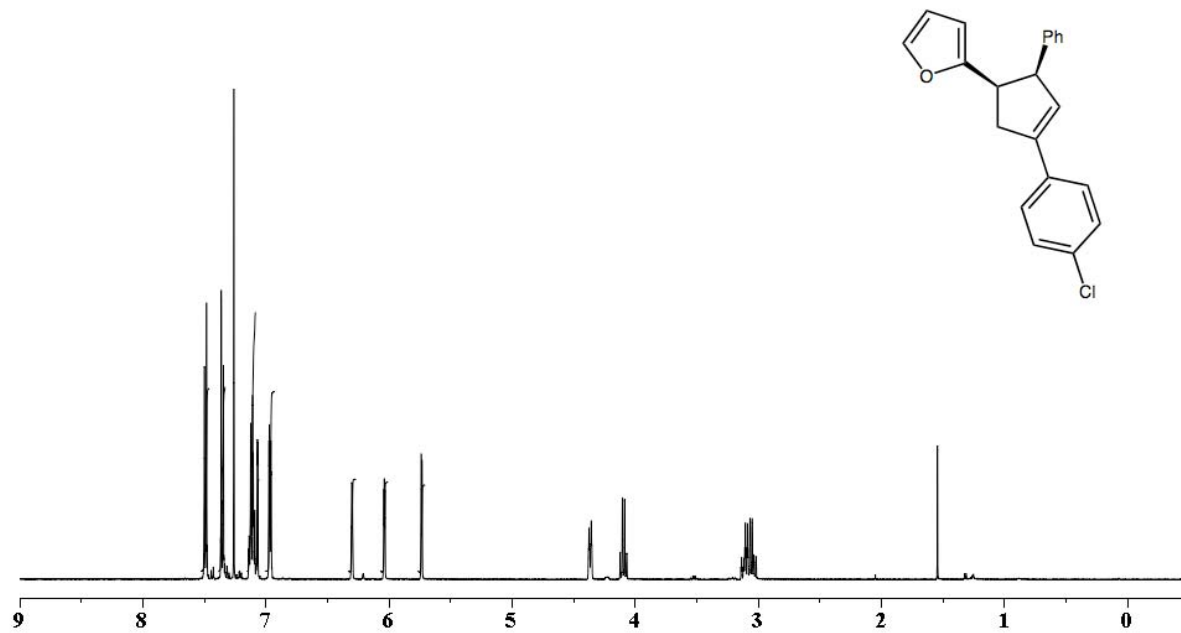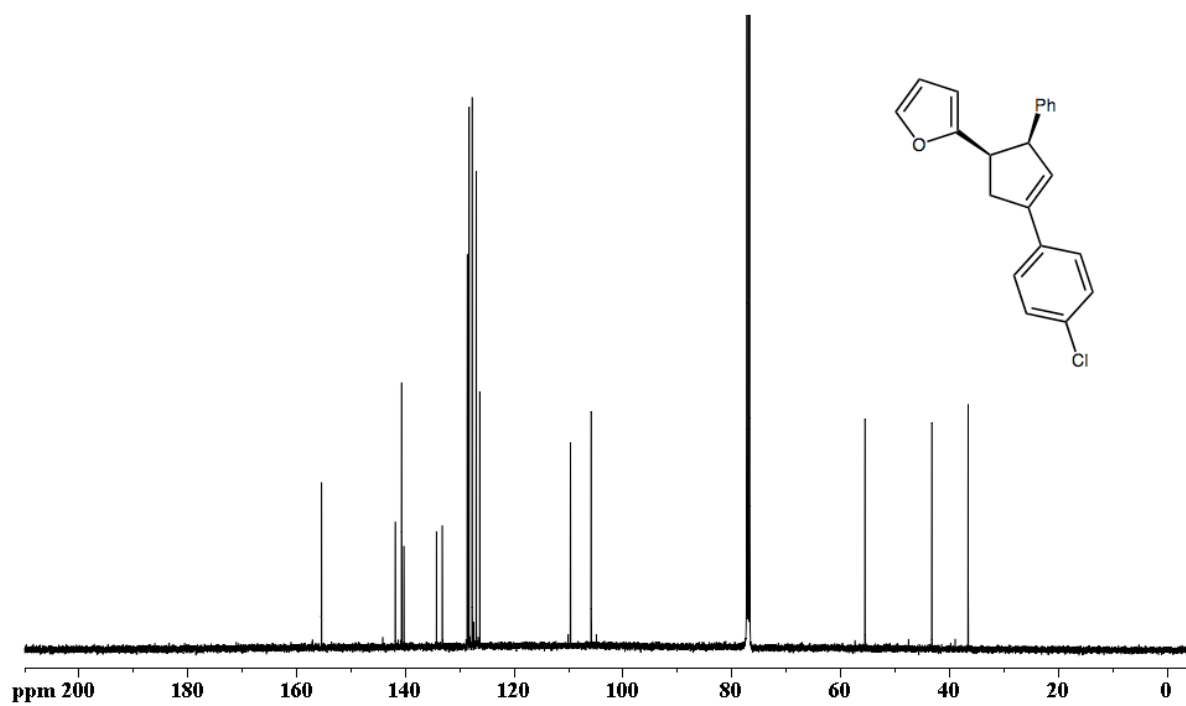



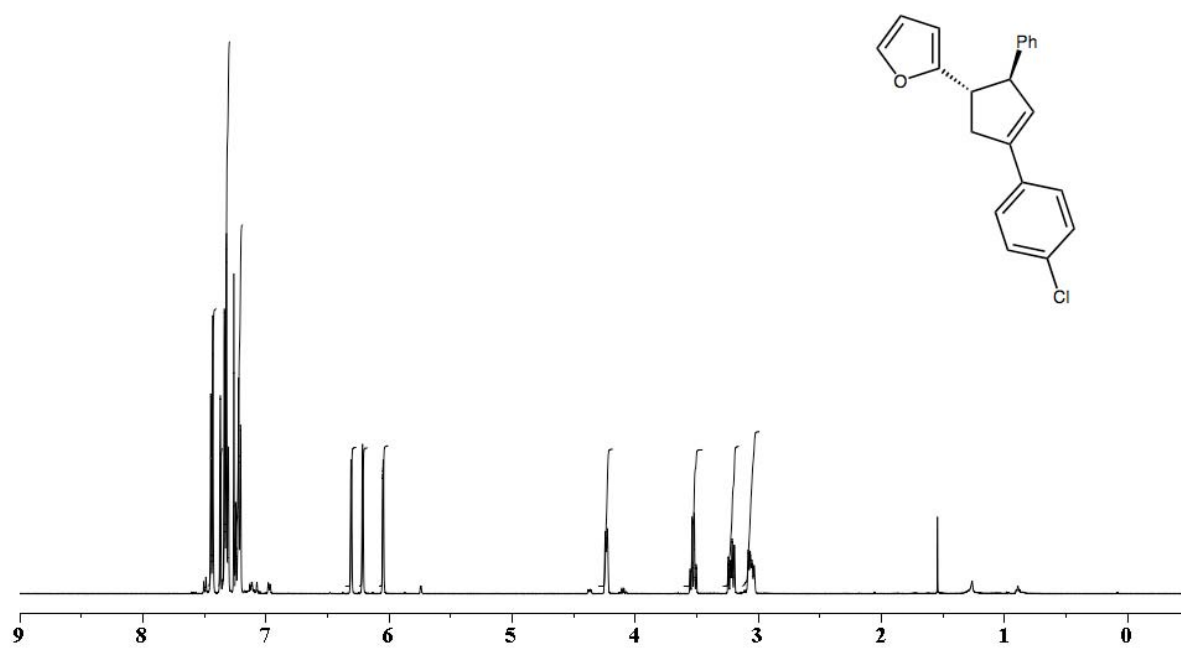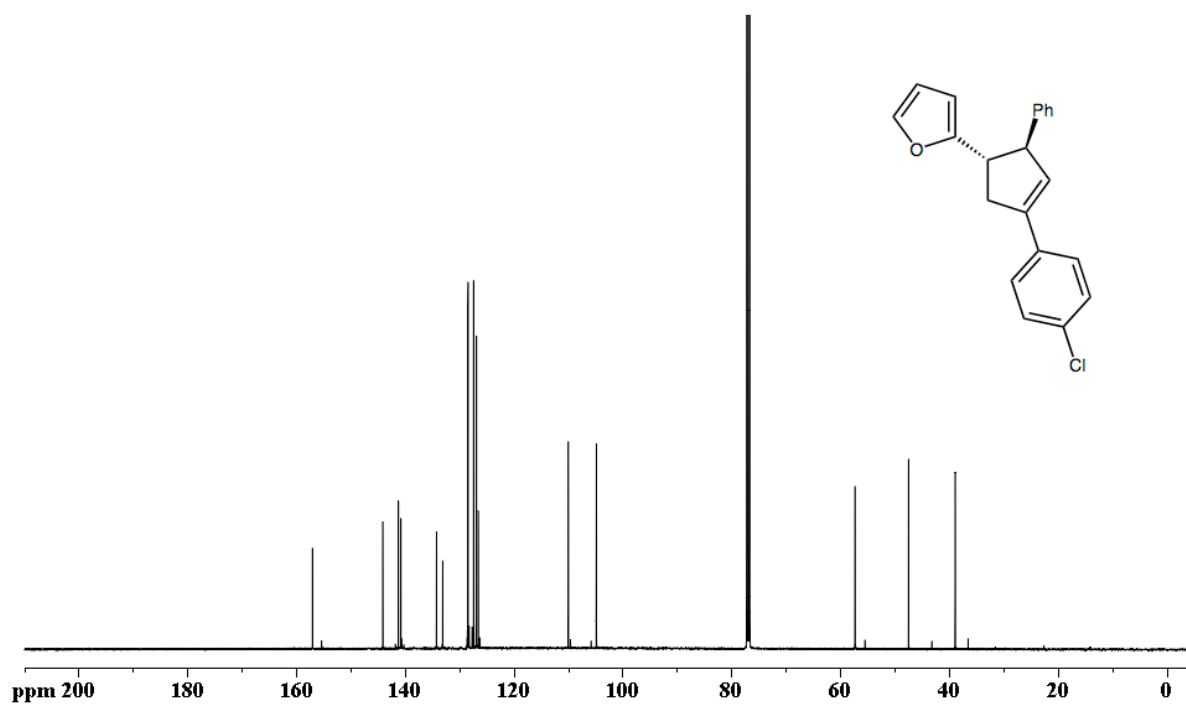

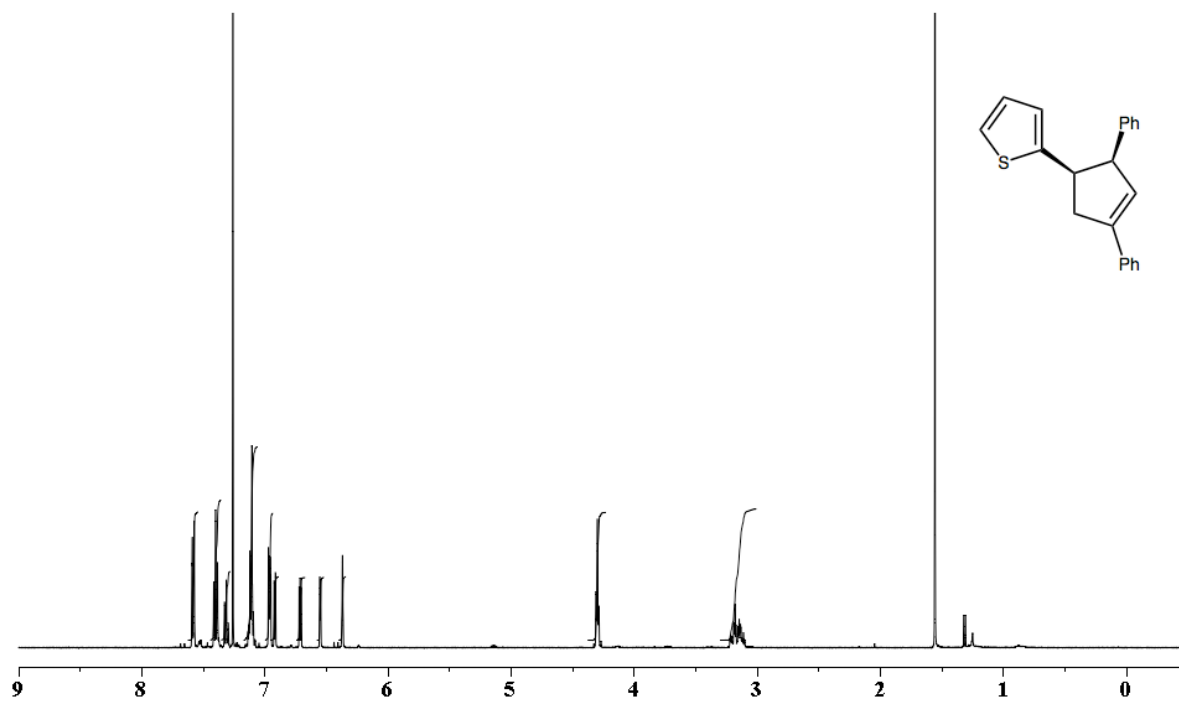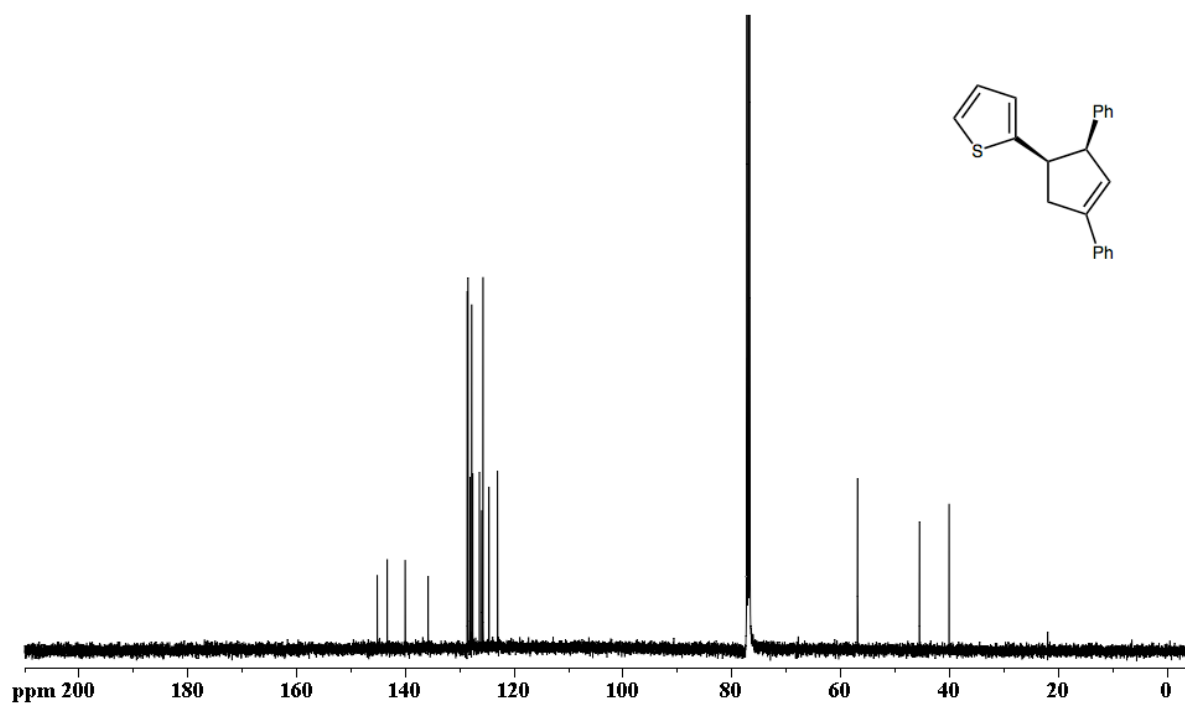

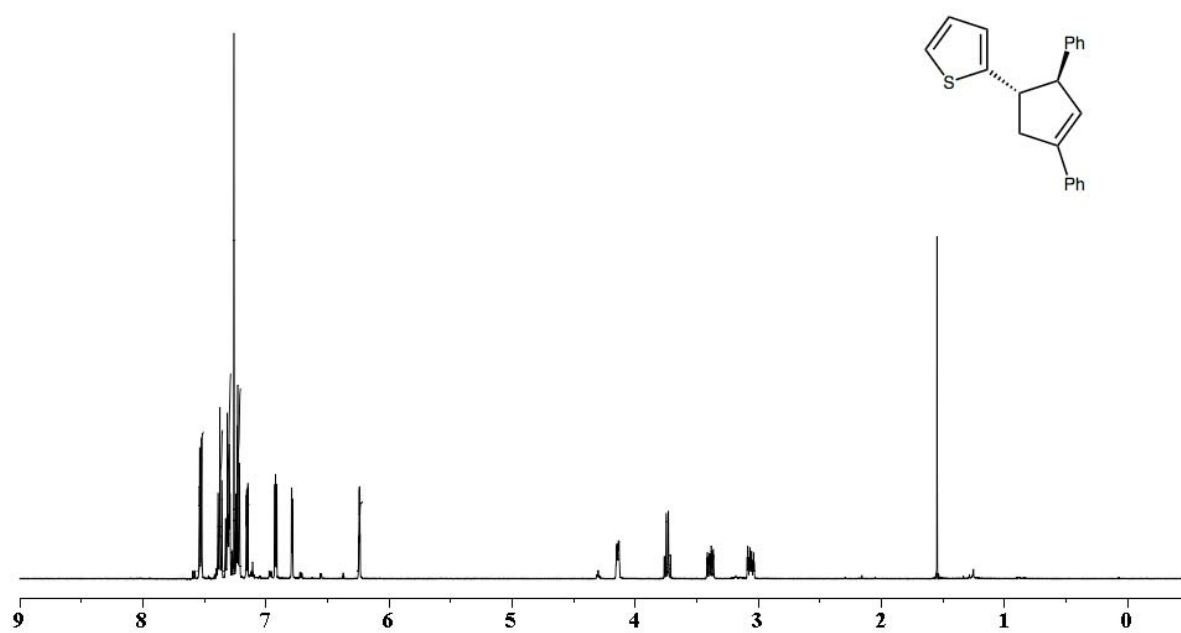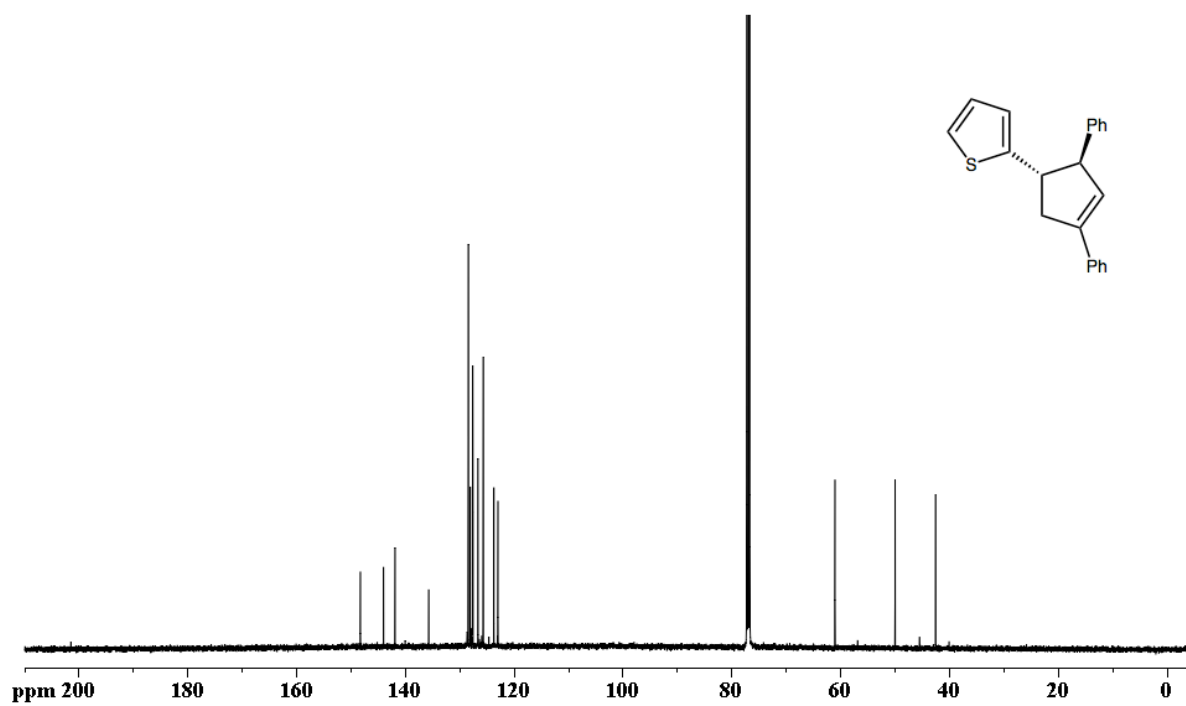

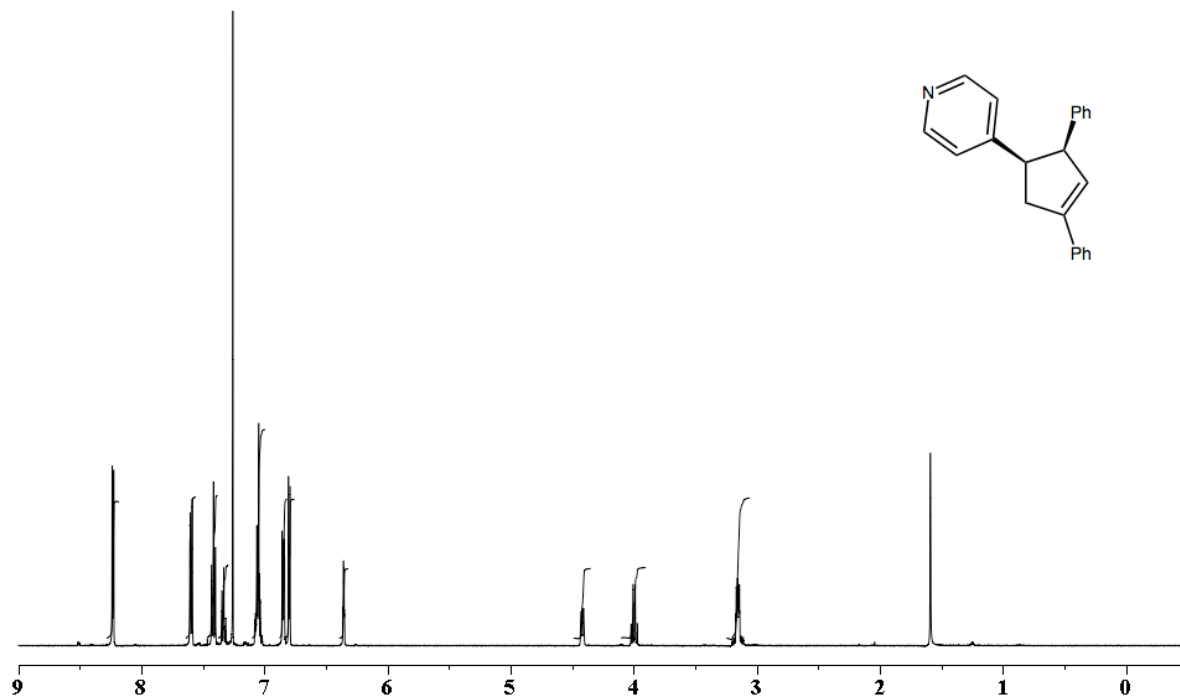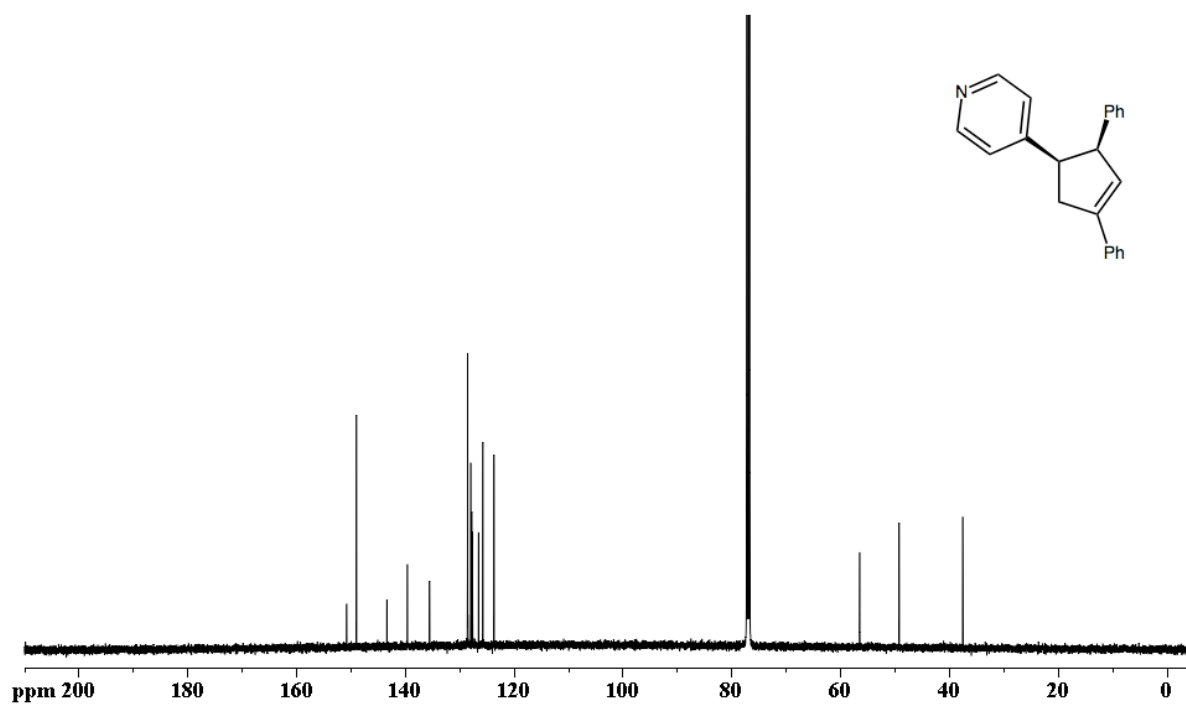

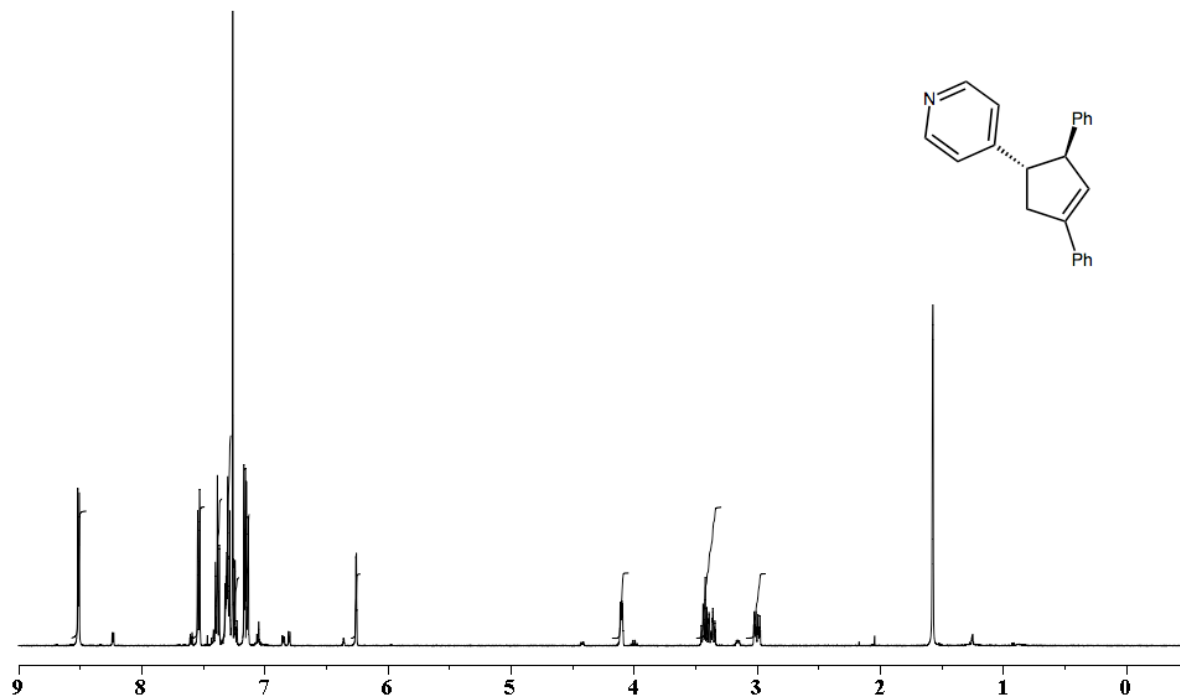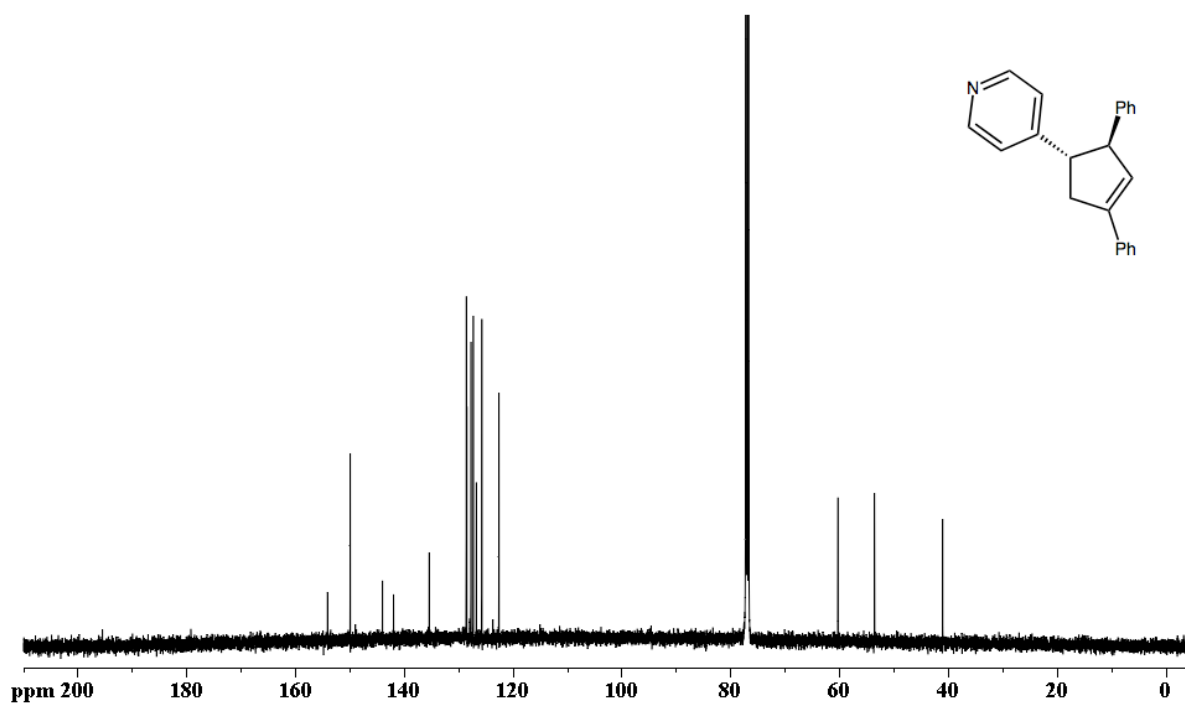

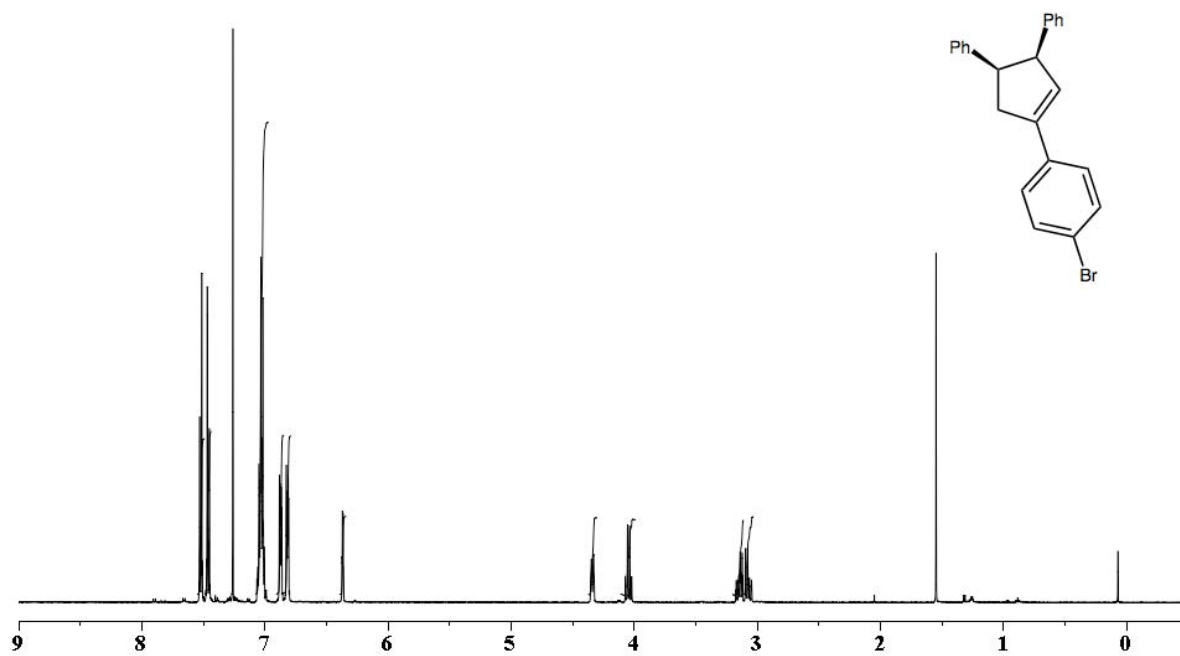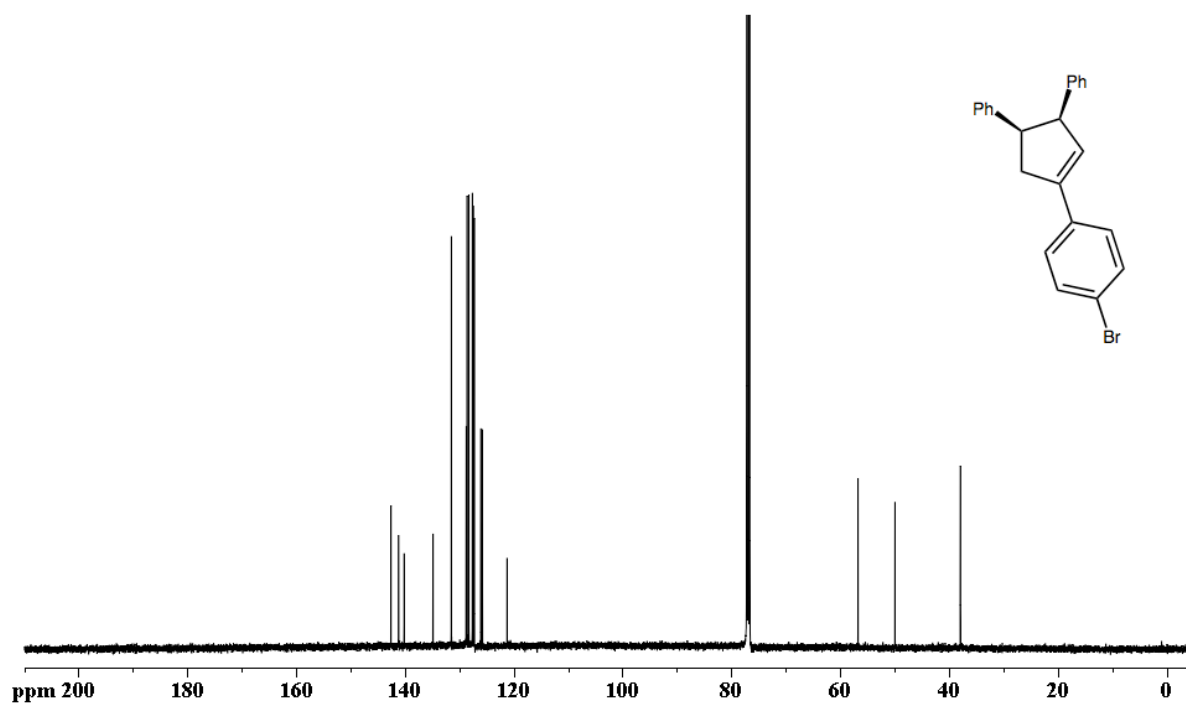

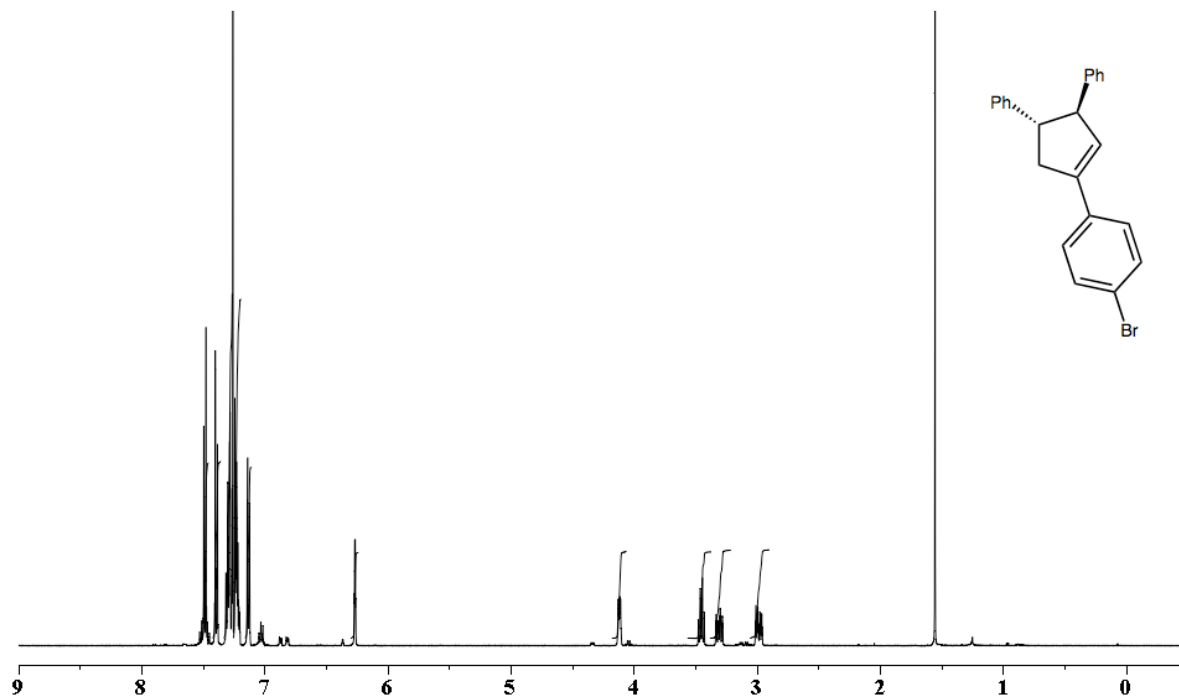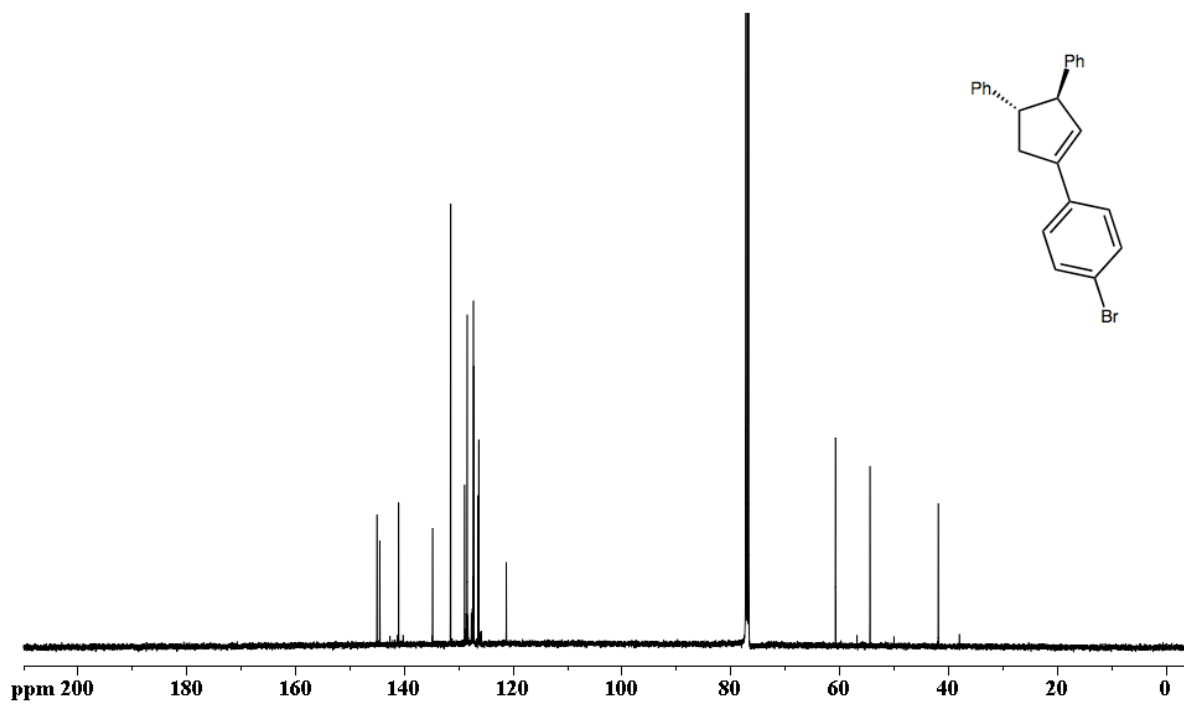

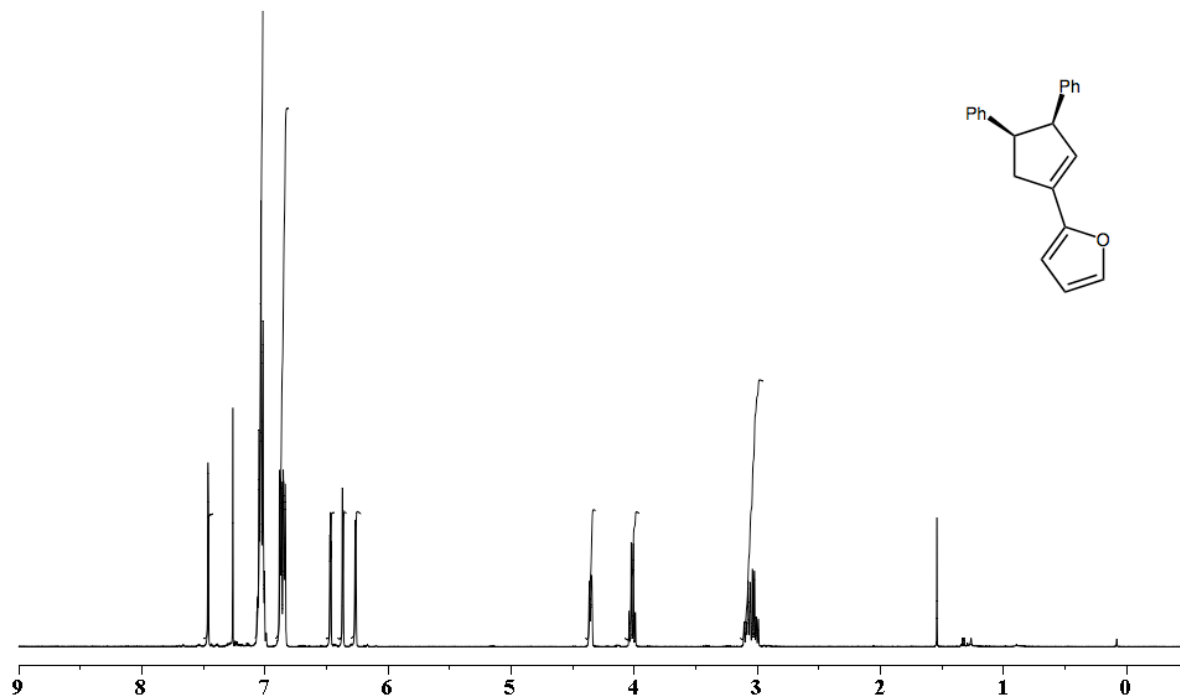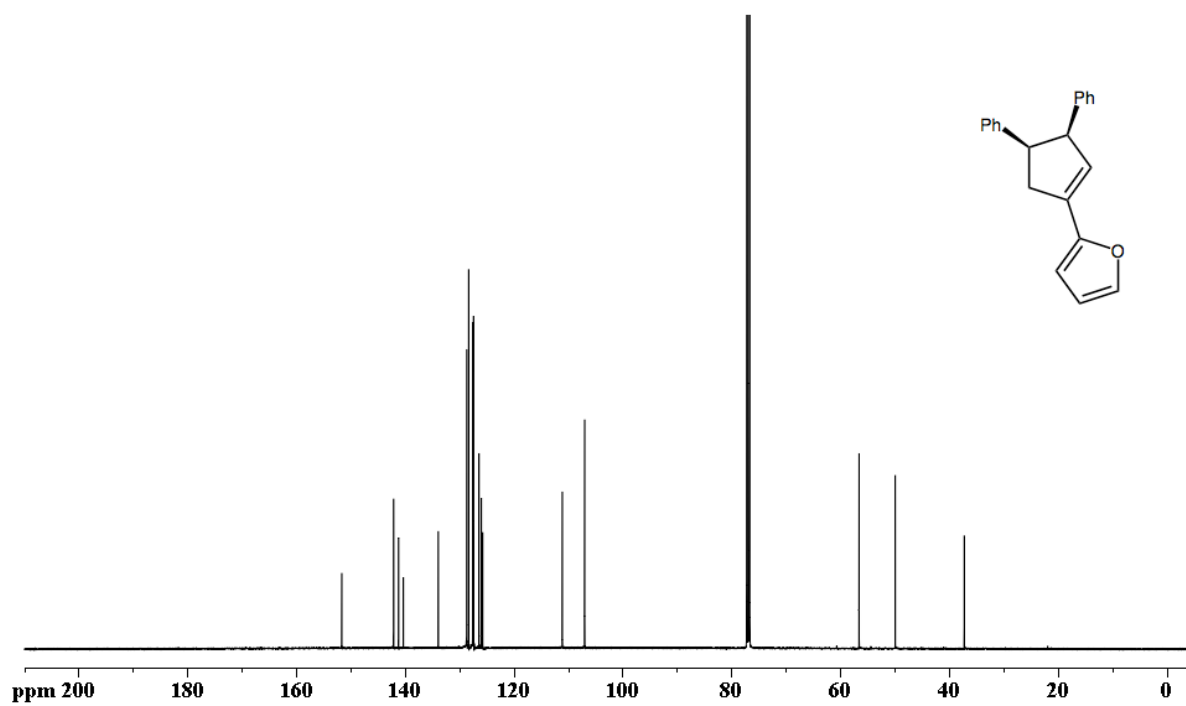



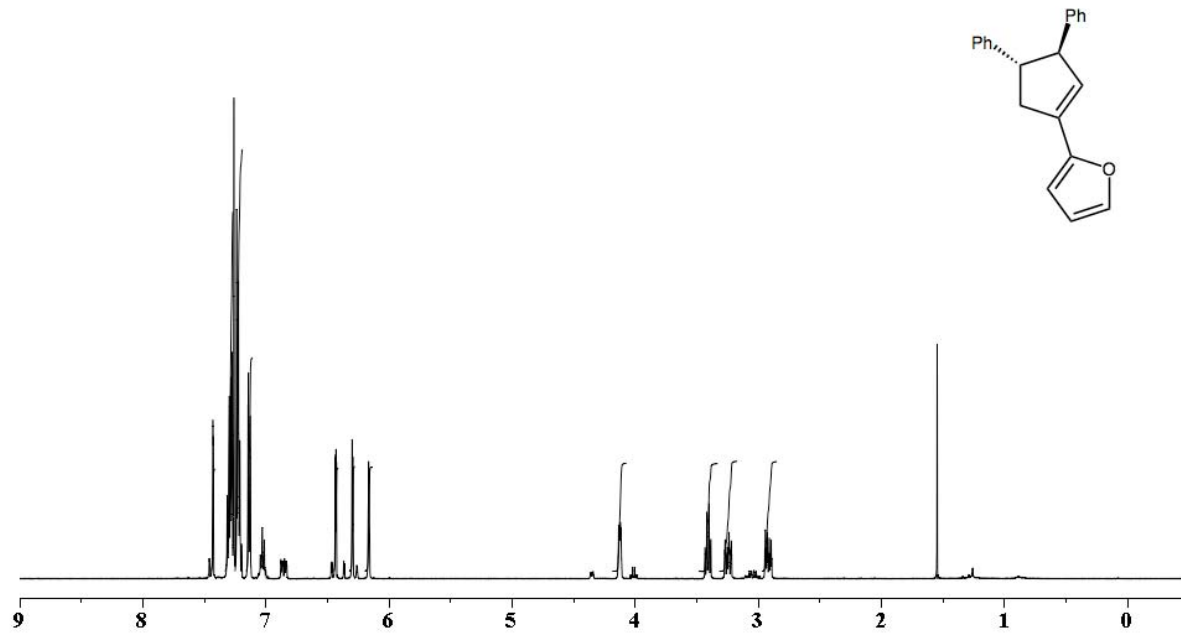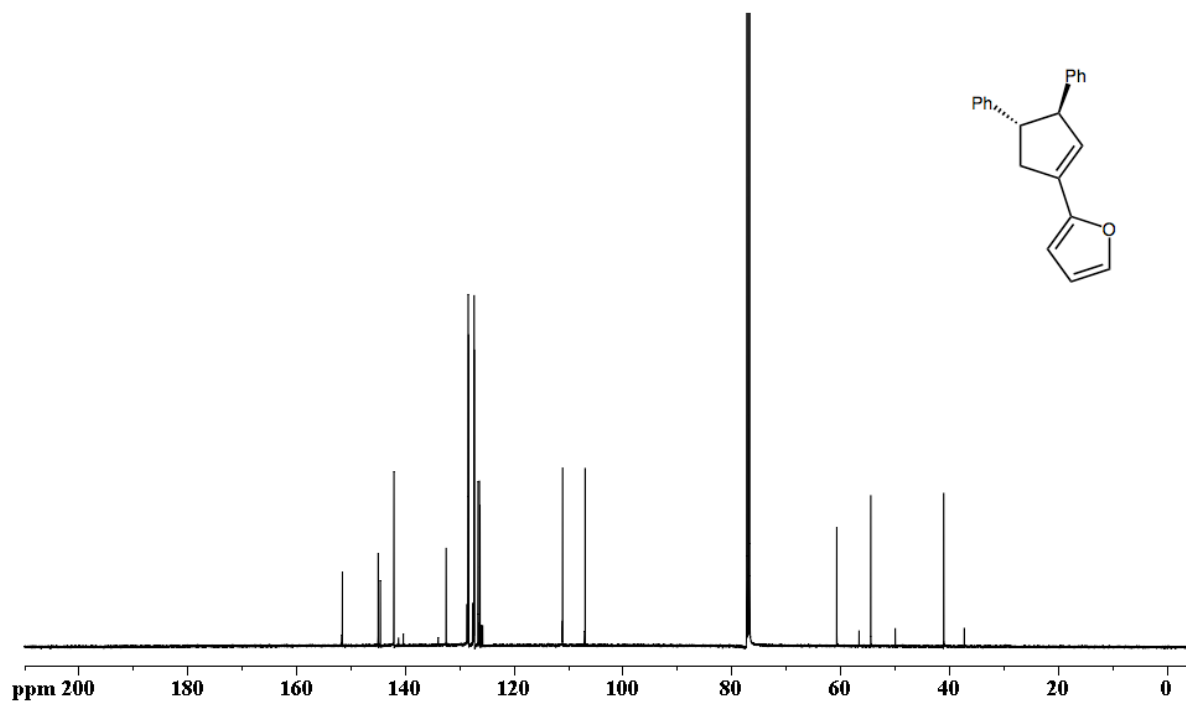

**X-Ray Crystallography of 20**

X-ray diffraction was performed at -120 °C and raw frame data were processed using SAINT. Molecular structure was solved using direct methods and refined by F2 by full-matrix least-squares techniques. The GOF = 1.12 for 217 variables refined to R1 = 0.031 for 4676 reflections with  $I > 2\sigma(I)$ . There was no absorption correction or Flack parameters. Further information is contained in the CIF file.

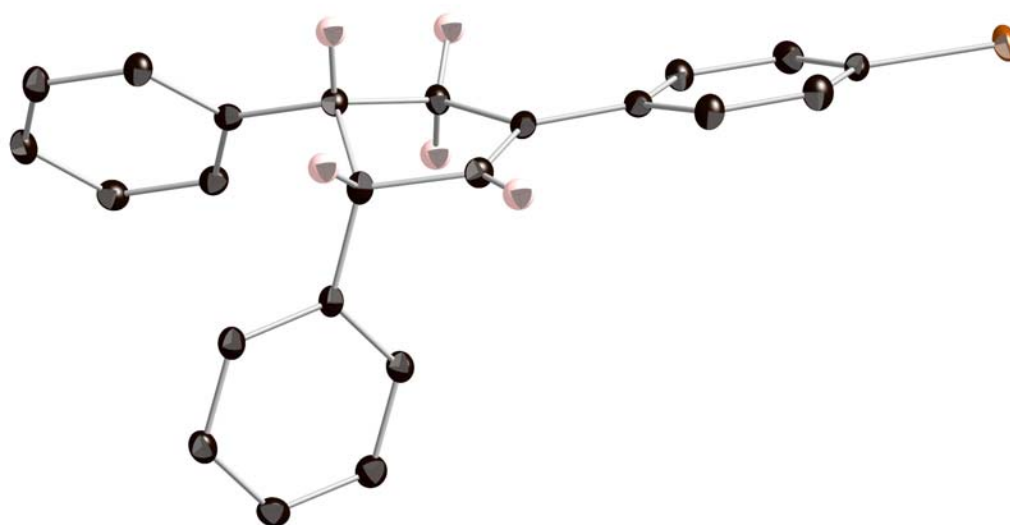

Supplement: NIHMS191941-supplement-2_si_002.pdf [file NIHMS191941-supplement-2_si_002.pdf]
